# Supplementary material for: Novel triterpenoid derivatives from Eucomis bicolor Bak. (Hyacinthaceae: Hyacinthoideae)
Source: Royal Society of Chemistry journal article supplement (doi:10.1039/c6ra28584h), 2017-01-01
Supplement: c6ra28584h1.pdf [file c6ra28584h1.pdf]

## SUPPORTING INFORMATION

### Novel triterpenoid derivatives from *Eucomis bicolor* Bak. (Hyacinthaceae: Hyacinthoideae)

Jaspreet K. Sihra,<sup>a</sup> Moses K. Langat,<sup>a,b</sup> Neil R. Crouch,<sup>b,c</sup> Jean-Marc Nuzillard,<sup>d</sup> Bertrand Plainchont<sup>d</sup> and Dulcie A. Mulholland,<sup>\*,a,b</sup>

<sup>a</sup>Department of Chemistry, Faculty of Engineering and Physical Sciences, University of Surrey, Guildford, GU2 7XH, Surrey, UK: [d.mulholland@surrey.ac.uk](mailto:d.mulholland@surrey.ac.uk). Tel +44 (0)1483 686751

<sup>b</sup>School of Chemistry and Physics, University of KwaZulu-Natal, Durban, 4041, South Africa

<sup>c</sup>Biodiversity Economy Unit, South African National Biodiversity Institute, PO Box 52099, Berea Road 4007, Durban, South Africa.

<sup>d</sup>Pharmacognosy Laboratory, University of Reims, Moulin de la House, BP 1039, 51687 Reims Cedex 2, France.

| CONTENTS:                                                                                                                                                                                                                                              | Page  |
|--------------------------------------------------------------------------------------------------------------------------------------------------------------------------------------------------------------------------------------------------------|-------|
| <b>S.1</b> Structures of all compounds isolated from <i>Eucomis bicolor</i>                                                                                                                                                                            | 2-5   |
| <b>S.2</b> Flow charts showing isolation of compounds                                                                                                                                                                                                  | 6-7   |
| <b>S.3</b> Details for the LSD input file                                                                                                                                                                                                              | 8-10  |
| <b>S.4</b> NMR spectra for compounds 1-5 and 6Ac-14Ac                                                                                                                                                                                                  | 11-75 |
| <b>S.5</b> NCI 59 cell line screening results for: 5,7-dihydroxy-8-methoxy-3-(4'-methoxybenzyl)-4-chromanone (EB1), eucosterol (EB4), (23 <i>S</i> )-17 $\alpha$ ,23-epoxy-3 $\beta$ ,28,29-trihydrox-27-norlanost-8-en-24-one (EB5), 2Ac, 3, 4 and 5. | 76-81 |

## S.1 Structures of all compounds isolated from *Eucomis bicolor*.

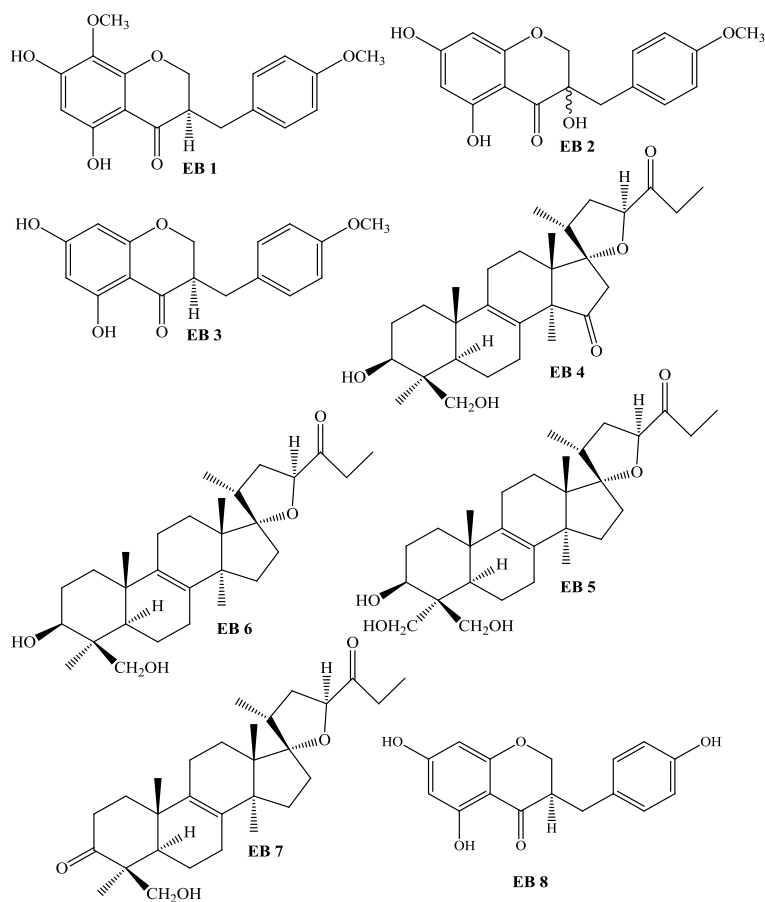

**Figure S1.1** Known compounds isolated from the dichloromethane extract (**EB 1-7**) and methanol extract (**EB 8**) of *Eucomis bicolor*

**EB 1** = (*R*)-5,7-dihydroxy-8-methoxy-3-(4'-methoxybenzyl)-4-chromanone; **EB 2** = 3,5,7-trihydroxy-3-(4'-methoxybenzyl)-4-chromanone; **EB 3** = (*R*)-5,7-dihydroxy-3-(4'-methoxybenzyl)-4-chromanone; **EB 4** = eucosterol; **EB 5** = (17*S*,23*S*)-23,17-epoxy-3 $\beta$ ,28,29-trihydroxy-27-norlanost-8-en-24-one; **EB 6** = 15-deoxoeucosterol; **EB 7** = 3-dehydro-15-deoxoeucosterol; **EB 8** = (*R*)-5,7-dihydroxy-3-(4'-hydroxybenzyl)-4-chromanone.

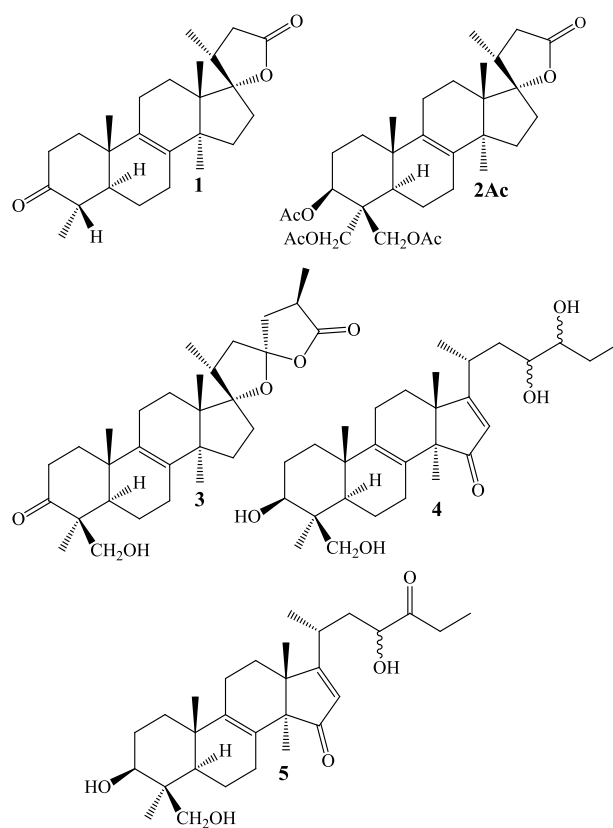

**Figure S 1.2: New compounds isolated from the dichloromethane extract of *Eucomis bicolor*.**

**1** = (17*S*)-24,25,26,27,29-pentanor-3-oxolanost-8-en-23,17-olide; **2Ac** = (17*S*)-24,25,26,27-tetranor-3 $\beta$ ,28,29-triacetoxy-23,17-olide; **3** = (17*S*,23*S*)-23,17-epoxy-29-hydroxy-3-oxolanost-8-en-27,23-olide; **4** = 3 $\beta$ ,23*S*,24 $\epsilon$ ,29-tetrahydroxy-27-norlanosta-8,16-dien-15-one; **5** = 3 $\beta$ ,23*S*,29-trihydroxy-27-norlanosta-8,16-diene-15,24-dione.

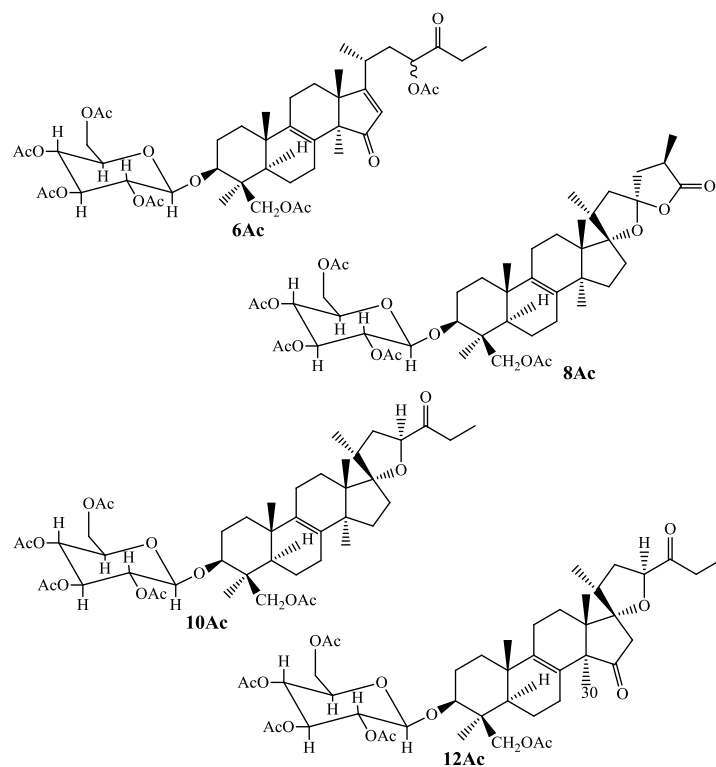

**Figure S 1.3: Monosaccharide triterpenoid derivaives isolated from the methanol extract of *Eucomis bicolor* (after acetylation of a complex mixture)**

**6Ac** = 23*S*,29-diacetoxy-3 $\beta$ -[2',3',4',6'-tetra-*O*-acetyl-*O*- $\beta$ -D-glucopyranoside]-27-norlanosta-8,16-diene-15,24-dione; **8Ac** = (17*S*,23*S*)-29-acetoxy-23,17-epoxy-3 $\beta$ -[2',3',4',6'-tetra-*O*-acetyl-*O*- $\beta$ -D-glucopyranoside]-lanost-8-en-27,23-olide; **10Ac** = (17*S*,23*S*)-29-acetoxy-23,17-epoxy-3 $\beta$ -[2',3',4',6'-tetra-*O*-acetyl-*O*- $\beta$ -D-glucopyranoside]-27-norlanost-8-en-24-one; **12Ac** = (17*S*,23*S*)-29-acetoxy-23,17-epoxy-3 $\beta$ -[2',3',4',6'-tetra-*O*-acetyl-*O*- $\beta$ -D-glucopyranoside]-27-norlanost-8-ene-15,24-dione.

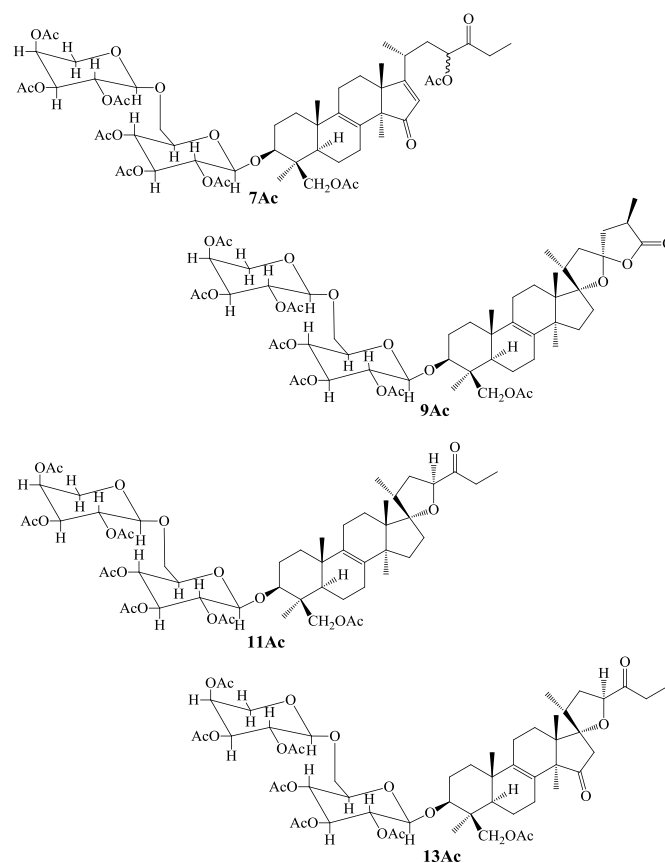

**Figure S 1.3: Disaccharide triterpenoid derivatives isolated from the methanol extract of *Eucomis bicolor* (after acetylation of a complex mixture).**

**7Ac** = 23*S*,29-diacetoxy-3 $\beta$ -[2',3',4'-tri-*O*-acetyl-*O*- $\beta$ -D-glucopyranoside-(1'' $\rightarrow$ 6')-2'',3'',4''-tri-*O*-acetyl- $\beta$ -D-arabinopyranosyl]-27-norlanosta-8,16-diene-15,24-dione); **9Ac** = (17*S*,23*S*)-29-acetoxy-23,17-epoxy-3 $\beta$ -[2',3',4'-tri-*O*-acetyl-*O*- $\beta$ -D-glucopyranoside-(1'' $\rightarrow$ 6')-2'',3'',4''-tri-*O*-acetyl-*O*- $\beta$ -D-arabinopyranosyl]-lanost-8-en-27,23-olide); **11Ac** = (17*S*,23*S*)-29-acetoxy-23,17-epoxy-3 $\beta$ -[2',3',4'-tri-*O*-acetyl-*O*- $\beta$ -D-glucopyranoside-(1'' $\rightarrow$ 6')-2'',3'',4''-tri-*O*-acetyl-*O*- $\beta$ -D-arabinopyranosyl]-27-norlanost-8-en-24-one); **13Ac** = (17*S*,23*S*)-29-acetoxy-23,17-epoxy-3 $\beta$ -[2',3',4'-tri-*O*-acetyl-*O*- $\beta$ -D-glucopyranoside-(1'' $\rightarrow$ 6')-2'',3'',4''-tri-*O*-acetyl-*O*- $\beta$ -D-arabinopyranosyl]-27-norlanost-8-ene-15,24-dione.

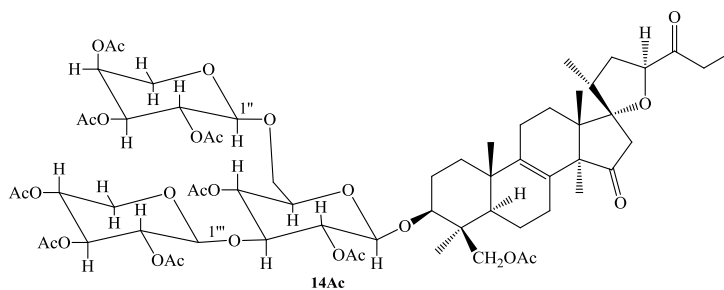

**Figure S 1.4: Trisaccharide triterpenoid derivative isolated from the methanol extract of *Eucomis bicolor* after acetylation.**

**14Ac** = (17*S*,23*S*)-29-acetoxy-23,17-epoxy-3 $\beta$ -[2',3',4'-tri-*O*-acetyl-*O*- $\beta$ -D-glucopyranoside-(6' $\rightarrow$ 1'')-2'',3'',4''-tri-*O*-acetyl-*O*- $\beta$ -D-arabinopyranosyl--(3'' $\rightarrow$ 1''')-2''',3''',4'''-tri-*O*-acetyl-*O*- $\beta$ -D-xylopyranosyl]-27-norlanost-8-ene-15,24-dione.

SC - small column-silica, 1 cm diameter, 2 ml fractions collected  
 SC-Sephedex – small column-sephedex, 1cm diameter, 2 ml fractions collected  
 LC - large column-silica, 5 cm diameter, 75 ml fractions collected  
 PTLC - Preparative TLC  
 D - DCM  
 M - MeOH  
 Et - Ethyl acetate  
 E - Diethyl ether

**S.2.1: Flow chart of the compounds isolated from the dichloromethane extract of *Eucomis bicolor* Bak.**

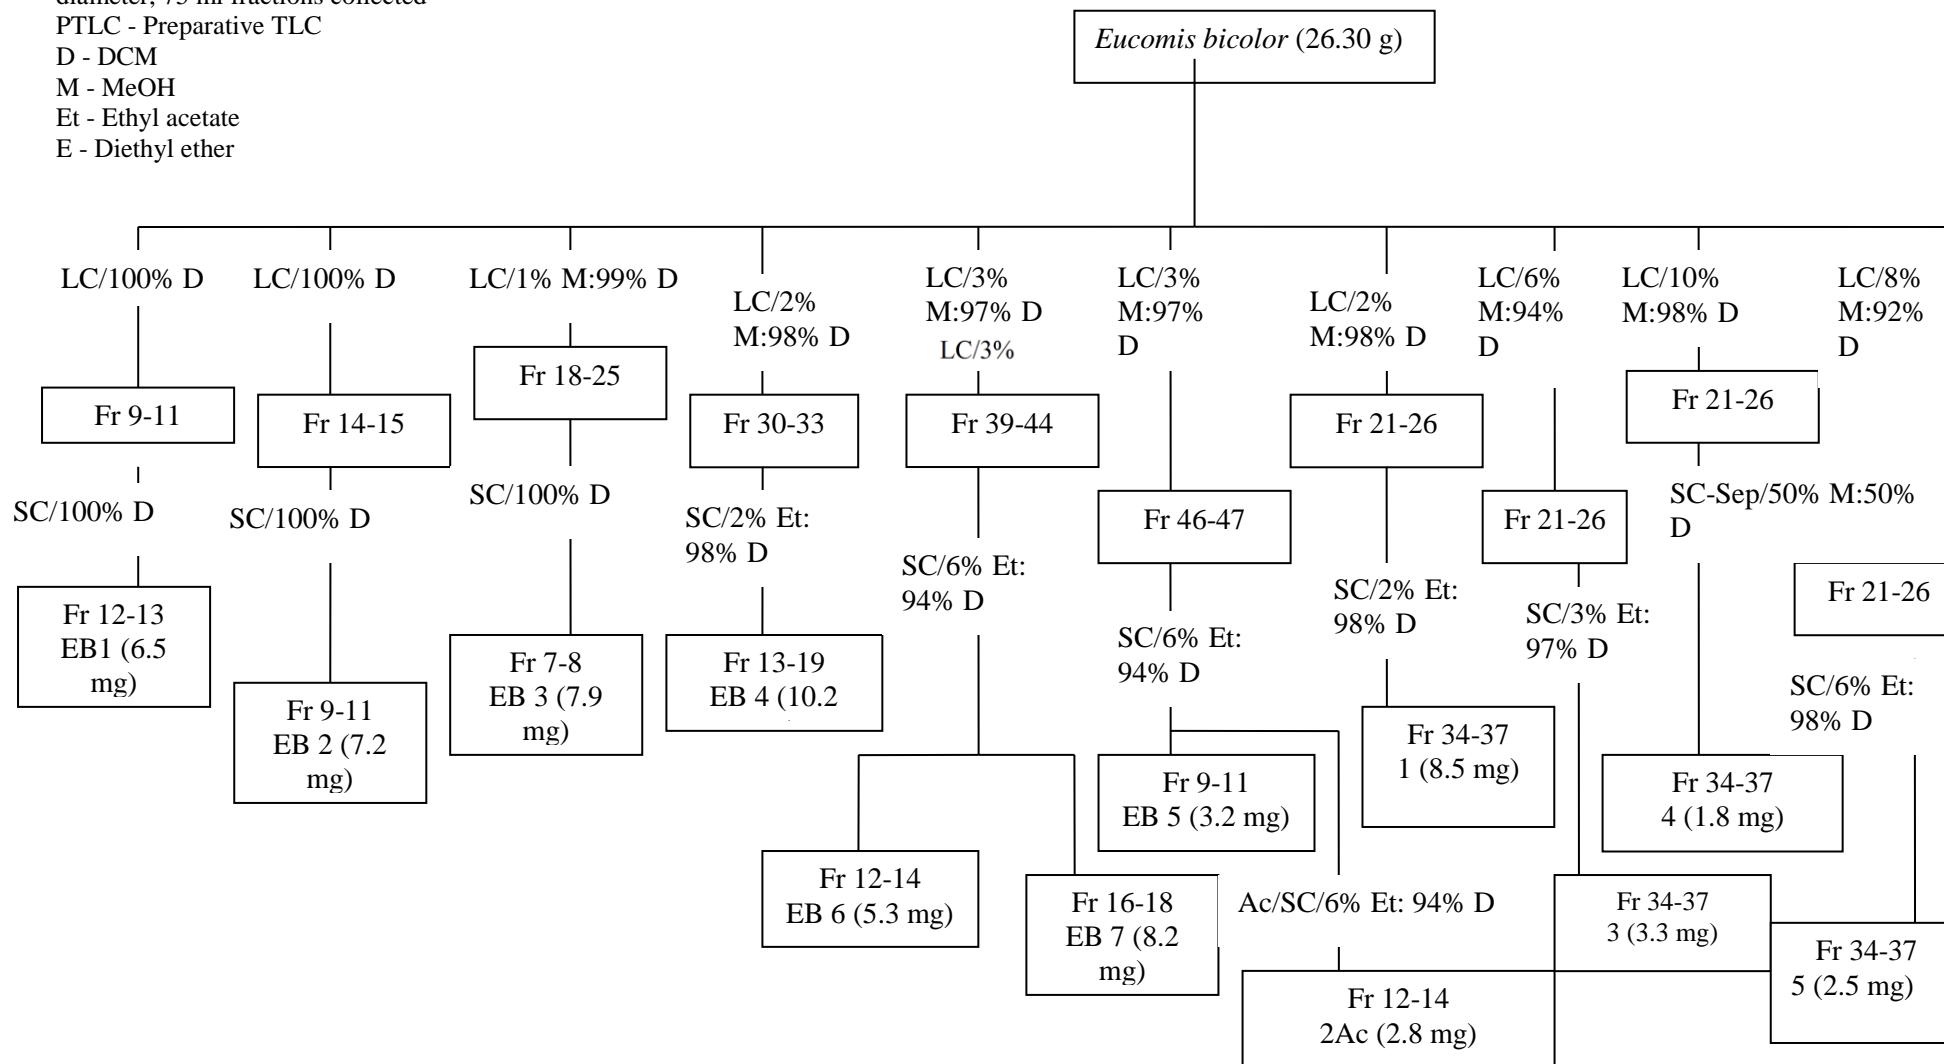

S. 2.2 Flow chart of the compounds isolated from the methanol extract of *Eucomis bicolor* Bak.

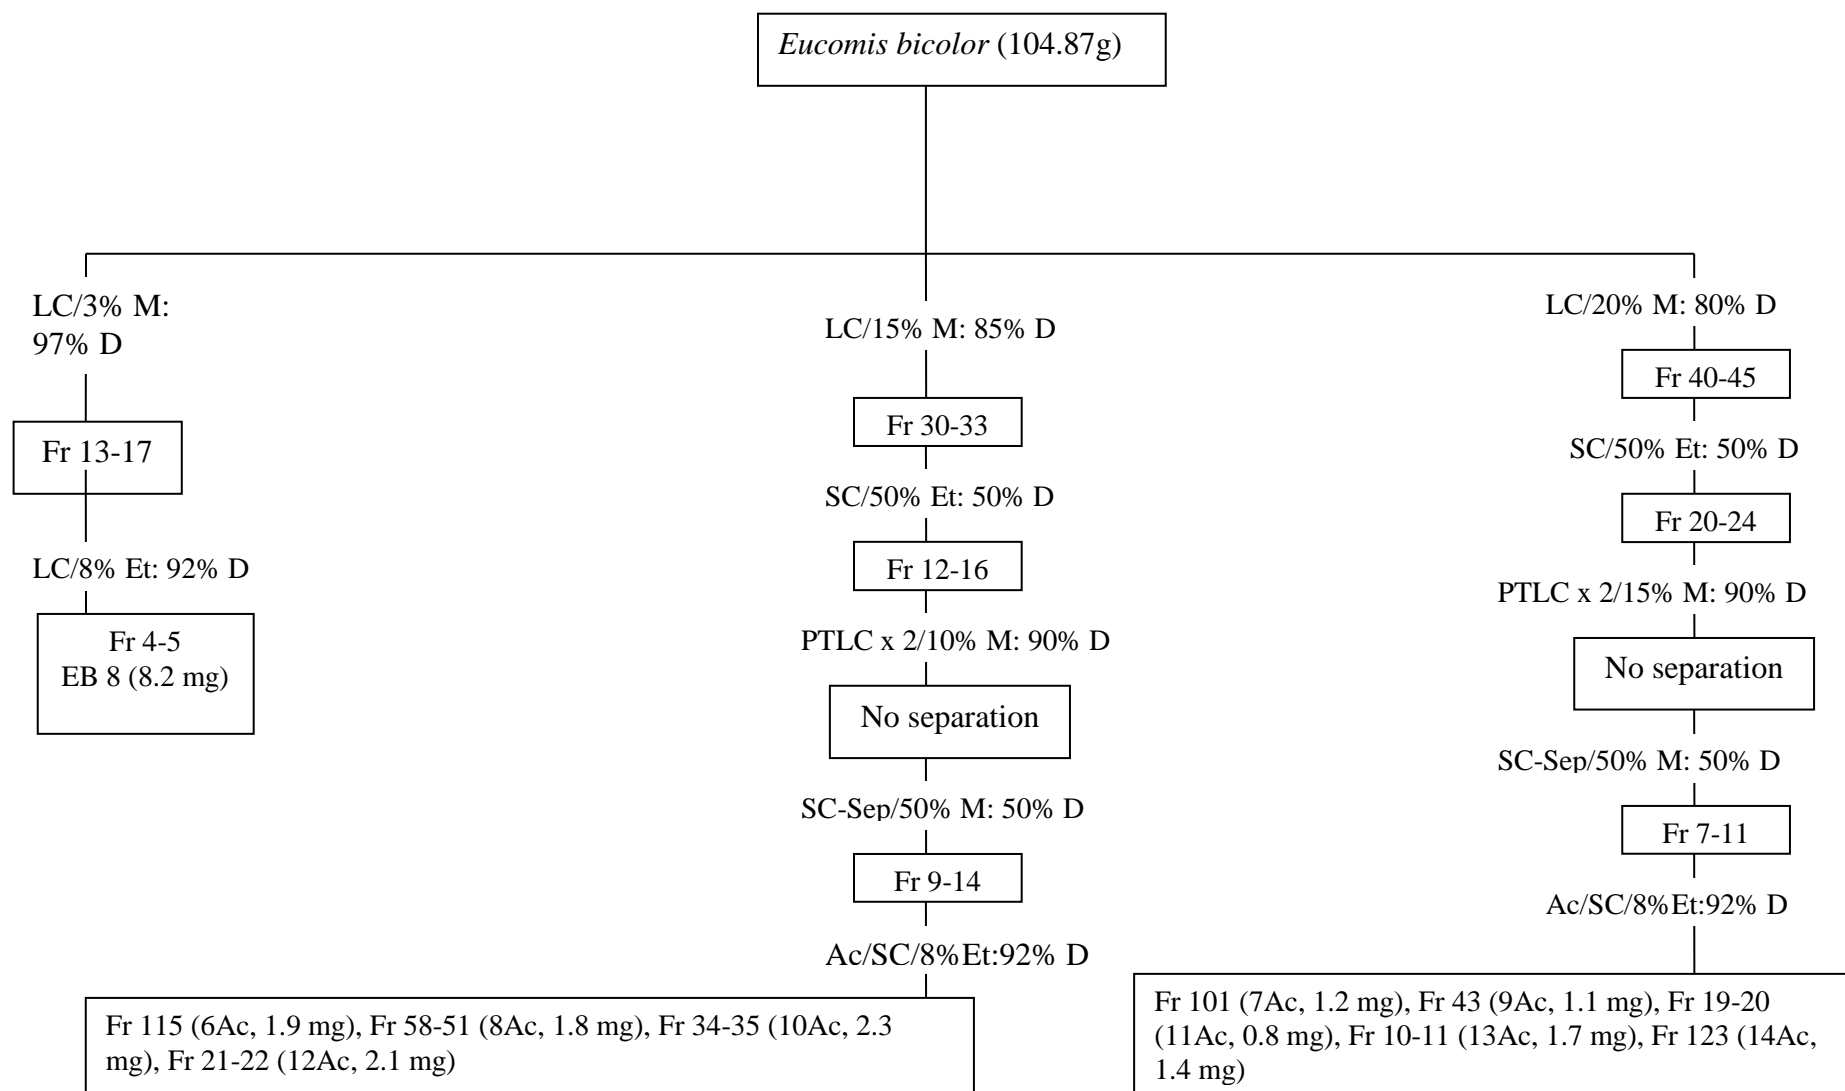

### S.3 Details for the LSD input file

; The LSD input file starts below the row of stars.  
; The lines must be copied in a text editor  
; such as textedit (Mac), gedit (Linux) or notepad++ (Windows)  
; and saved as simple text.

; \*\*\*\*\*

; Compound 1  
ELIM 1 4 ; 1 HMBC correlation can be 4J

; LSD atom numbering (Hs excepted)

MULT 1 C 2 0 ; Atom 1 is a C, is hybridized sp<sup>2</sup>, and has 0 H atom attached

MULT 2 C 2 0 SHIX 6 50.9

MULT 3 C 2 0 SHIX 7 49.7

MULT 4 C 2 0 SHIX 8 49.0

MULT 5 C 3 0 SHIX 9 45.2

MULT 6 C 3 0 SHIX 10 41.9

MULT 7 C 3 1 SHIX 11 39.3

MULT 8 C 3 0 SHIX 12 39.2

MULT 9 C 3 1 SHIX 13 38.0

MULT 10 C 3 1 SHIX 14 37.1

MULT 11 C 3 2 SHIX 15 36.8

MULT 12 C 3 2 SHIX 16 31.5

MULT 13 C 3 2 SHIX 17 25.9

MULT 14 C 3 2 SHIX 18 25.4

MULT 15 C 3 0 SHIX 19 24.7

MULT 16 C 3 2 SHIX 20 22.1

MULT 17 C 3 3 SHIX 21 21.5

MULT 18 C 3 2 SHIX 22 18.2

MULT 19 C 3 2 SHIX 23 17.9

MULT 20 C 3 2 SHIX 24 17.7

MULT 21 C 3 2 SHIX 25 11.7

MULT 22 C 3 3

MULT 23 C 3 3

MULT 24 C 3 3

MULT 25 C 3 3

MULT 26 O 2 0

MULT 27 O 2 0

MULT 28 O 3 0

; H atom numbering

HSQC 1 1 ; see below about HMBC (11  
18 21) 5

HSQC 2 2 ; idem

HSQC 3 3 ; idem

HSQC 4 4 ; idem

HSQC 5 5 ; idem

HSQC 6 6 ; idem

HSQC 7 7

HSQC 8 8 ; idem

HSQC 9 9

HSQC 10 10

HSQC 11 11

HSQC 12 12

HSQC 13 13

; the SHIX commands are ignored by LSD

; and were added as documentation

SHIX 1 213.1 ; The chemical shift of C-1  
is 213.1 ppm

SHIX 2 177.1

SHIX 3 135.8

SHIX 4 133.1

SHIX 5 98.4



|                                                                                 |                                                         |
|---------------------------------------------------------------------------------|---------------------------------------------------------|
| HSQC 14 14                                                                      | ; The LSD syntax does not allow it, sorry.              |
| HSQC 15 15 ; idem                                                               | ; This is equivalent to HMBC (11 18 21) 5               |
| HSQC 16 16                                                                      | ; because of the numbering of Hs                        |
| HSQC 17 17                                                                      | according to Cs using HSQC data.                        |
| HSQC 18 18 ; C-18 is bound to H-18<br>(even though there are two of them)       | ; this forces to "invent" an H-5 that does<br>not exist |
| HSQC 19 19                                                                      | ; and explains why a few quaternary Cs                  |
| HSQC 20 20                                                                      | (among which C-5)                                       |
| HSQC 21 21                                                                      | ; are declared in the HSQC section.                     |
| HSQC 22 22                                                                      | Therefore:                                              |
| HSQC 23 23                                                                      | HMBC (11 18 21) 5                                       |
| HSQC 24 24                                                                      | HMBC 5 12                                               |
| HSQC 25 25                                                                      | HMBC 5 16                                               |
|                                                                                 | HMBC 5 23                                               |
|                                                                                 | HMBC 5 22                                               |
|                                                                                 |                                                         |
| COSY 7 9 ; H-7 and H-9 correlate in the<br>COSY spectrum (strong intensity, 3J) | HMBC (11 18 21) 6                                       |
| COSY 7 20                                                                       | HMBC 6 16                                               |
| COSY 10 12                                                                      | HMBC 6 19                                               |
| COSY 13 14                                                                      | HMBC 6 17                                               |
| COSY 23 10                                                                      | HMBC 6 22                                               |
| COSY 25 9                                                                       |                                                         |
|                                                                                 | HMBC 7 9                                                |
| BOND 1 26 ; C=O ketone                                                          | HMBC (14 18) 7                                          |
| BOND 2 27 ; C=O lactone                                                         | HMBC 7 20                                               |
| BOND 2 28 ; C-O lactone                                                         | HMBC 7 24                                               |
| BOND 5 28 ; O-C lactone                                                         | HMBC 7 25                                               |
| BOND 3 4 ; C=C                                                                  |                                                         |
|                                                                                 | HMBC 8 19                                               |
| HMBC 1 13 ; C-1 correlates with H-13 in<br>the HMBC spectrum                    | HMBC (11 18 21) 8                                       |
| HMBC 1 9                                                                        | HMBC 8 19                                               |
| HMBC 1 14                                                                       | HMBC (16 20) 8                                          |
| HMBC 1 25                                                                       | HMBC 8 17                                               |
|                                                                                 | HMBC 8 22                                               |
|                                                                                 |                                                         |
| HMBC 2 12                                                                       | HMBC 9 13                                               |
| HMBC 2 10                                                                       | HMBC (16 20) 9                                          |
| HMBC 2 12                                                                       | HMBC 9 7                                                |
|                                                                                 | HMBC 9 25                                               |
|                                                                                 |                                                         |
| HMBC 3 20 ; low intensity                                                       |                                                         |
| HMBC 3 16 ; idem                                                                | HMBC 10 12                                              |
| HMBC 3 17                                                                       | HMBC (11 18 21) 10                                      |
|                                                                                 | HMBC 10 12                                              |
|                                                                                 | HMBC 10 23                                              |
|                                                                                 |                                                         |
| HMBC 4 14 ; idem                                                                |                                                         |
| HMBC 4 19 ; idem                                                                |                                                         |
| HMBC 4 24                                                                       | HMBC 11 16                                              |
|                                                                                 |                                                         |
| ; C-5 correlates with H-11 or H-18 or H-21                                      | HMBC 12 10                                              |
| ; This should be written HMBC 5 (11 18<br>21).                                  | HMBC 12 23                                              |

HMBC 13 14

HMBC 19 22

HMBC 14 13

HMBC 20 9

HMBC 14 24

HMBC (14 18) 20

HMBC 20 7

HMBC 15 13

HMBC 15 14

HMBC 21 19

HMBC 15 20

HMBC 15 7

HMBC 22 19

HMBC 15 24

HMBC 23 12

HMBC (11 18 21) 16

HMBC 23 10

HMBC 16 17

HMBC 24 14

HMBC 17 16

HMBC 24 7

HMBC 18 20

HMBC 25 13

HMBC 25 9

QUAT L1 ; L1 is the list of quaternary carbons

LIST L2 17 22 24 ; L2 is the list of the indexes of methyl singlets

PROP L2 1 L1 ; each singlet methyl has exactly one quaternary carbon as neighbor

CH L3 ; L3 is the list of methine carbons

LIST L4 23 25 ; L4 is the list of the indexes of methyl doublets

PROP L4 1 L3 ; each doublet methyl has exactly one methine carbon as neighbor

**S.4 NMR spectra for compounds 1-5 and 6Ac-14Ac. (See Figures S1.1, S 1.2, S 1.3 and S 1.4 for names and structures).**

**Elemental Composition Report**

**Single Mass Analysis**

Tolerance = 5.0 PPM / DBE: min = -1.5, max = 150.0

Isotope cluster parameters: Separation = 1.0 Abundance = 1.0%

Monoisotopic Mass, Odd and Even Electron Ions

260 formula(e) evaluated with 1 results within limits (all results (up to 1000) for each mass)

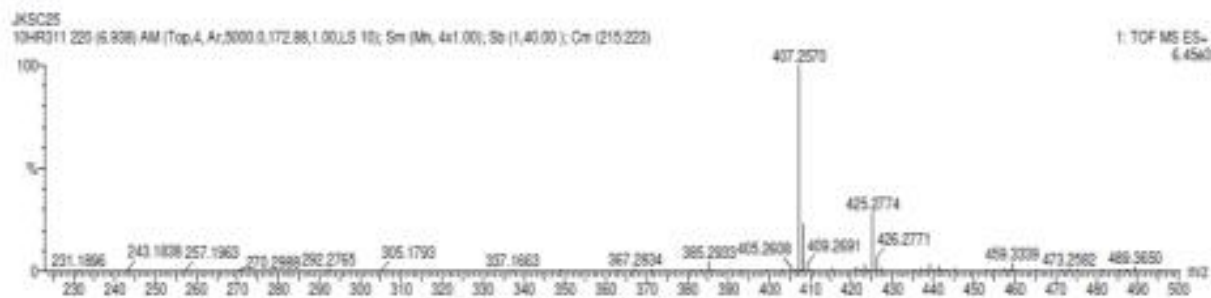

| Minimum | Maximum | Calc. Mass | Obs. Mass | PPM | DBE | Score | Formula       |
|---------|---------|------------|-----------|-----|-----|-------|---------------|
| -1.5    | 150.0   | 407.2562   | 407.2570  | 2.1 | 7.5 | 1     | C25 H34 O2 Na |

**Spectrum S.3.1.1: Mass spectrum for compound 1**

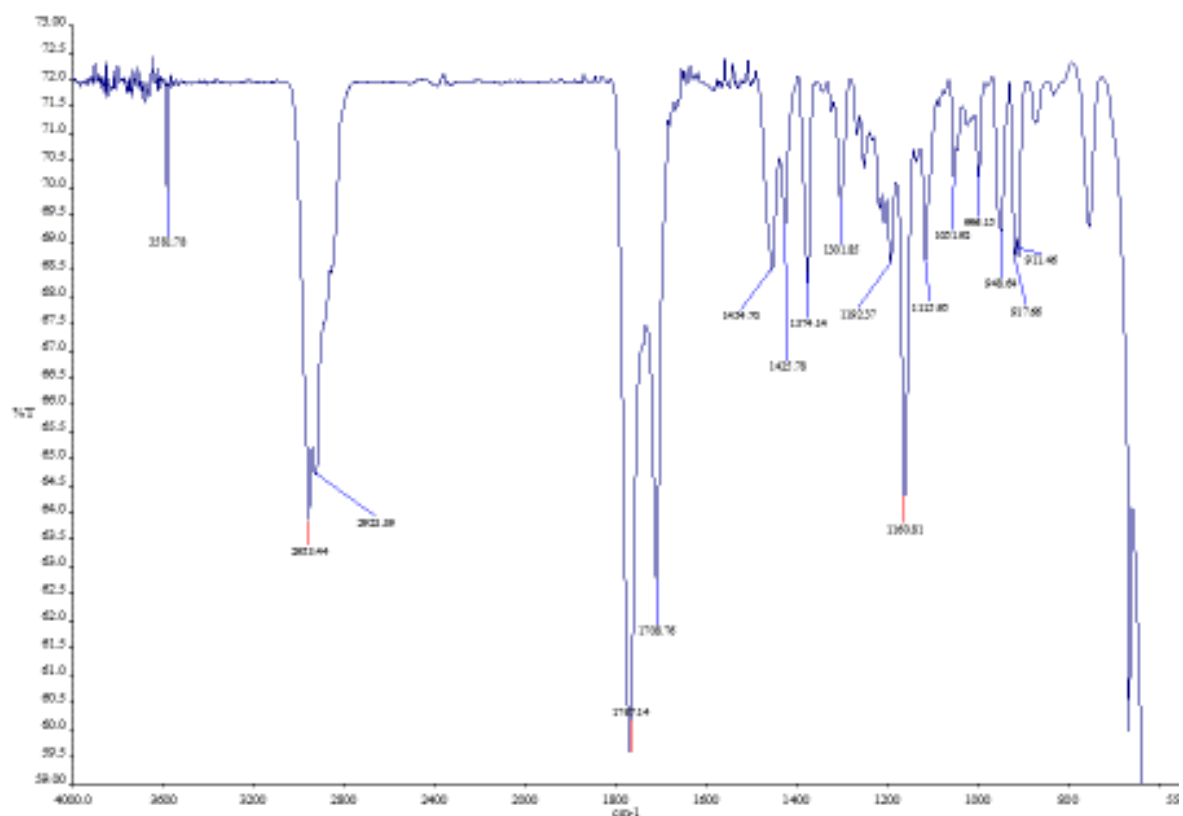

Spectrum S.3.1.2: FTIR spectrum for compound 1

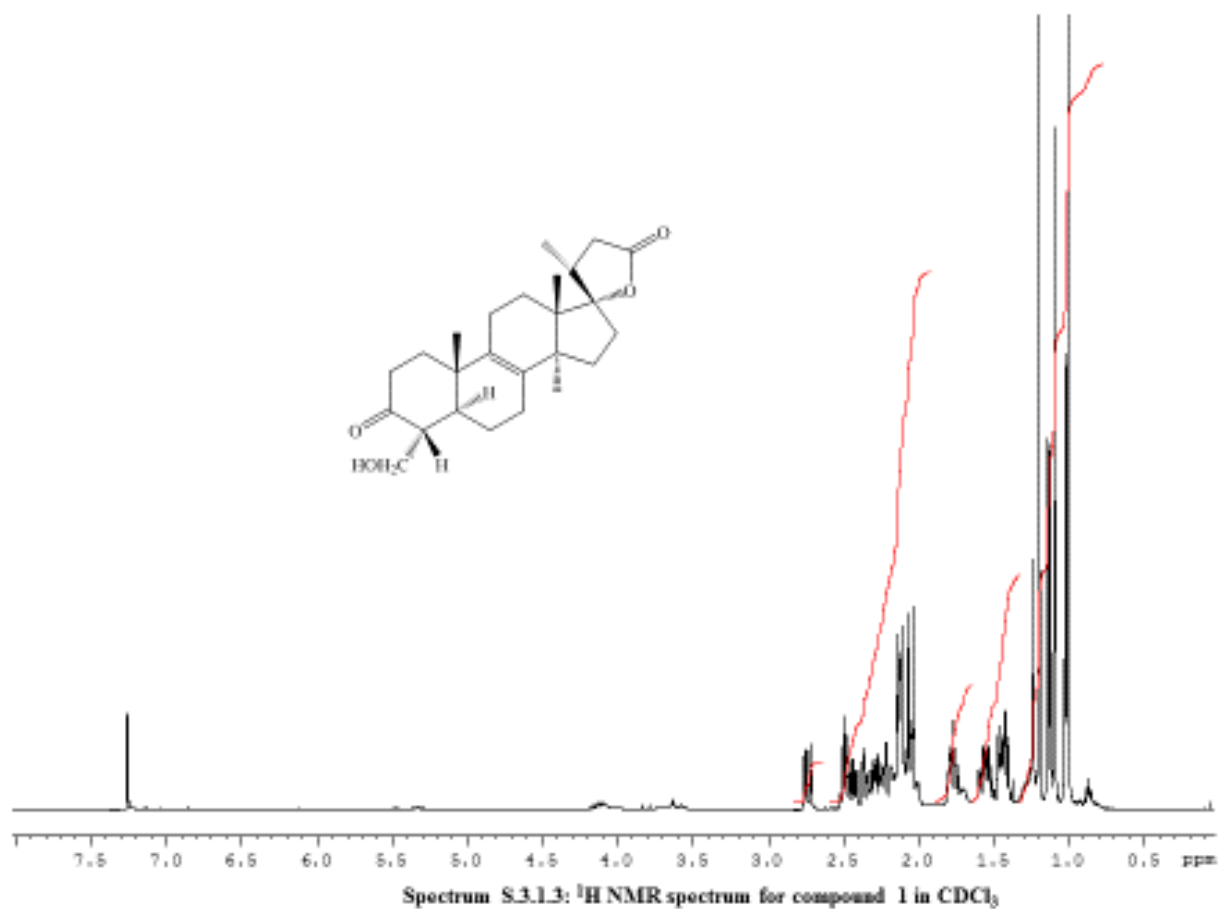

Spectrum S.3.1.3: <sup>1</sup>H NMR spectrum for compound 1 in CDCl<sub>3</sub>

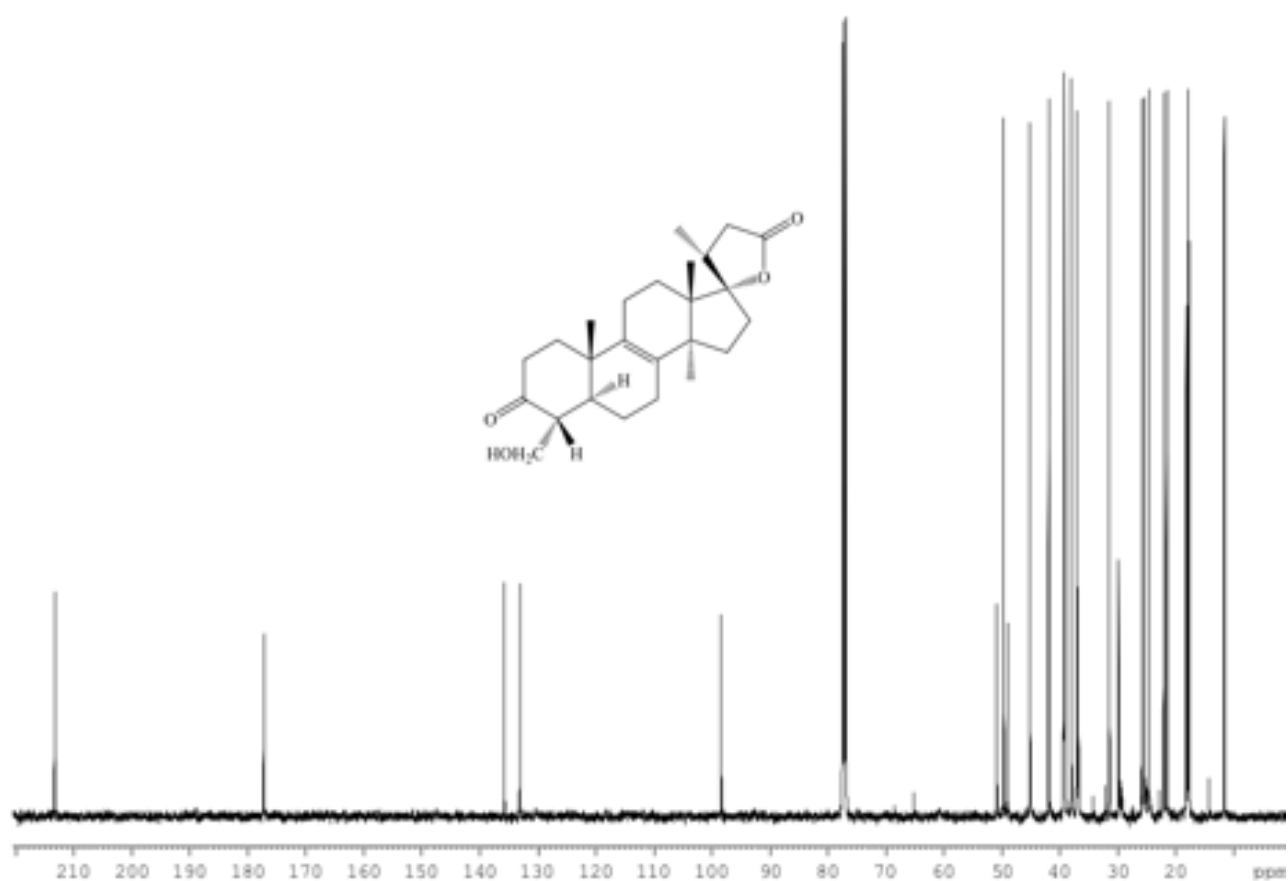

Spectrum S.3.1.4: <sup>13</sup>C NMR spectrum for compound 1 in CDCl<sub>3</sub>

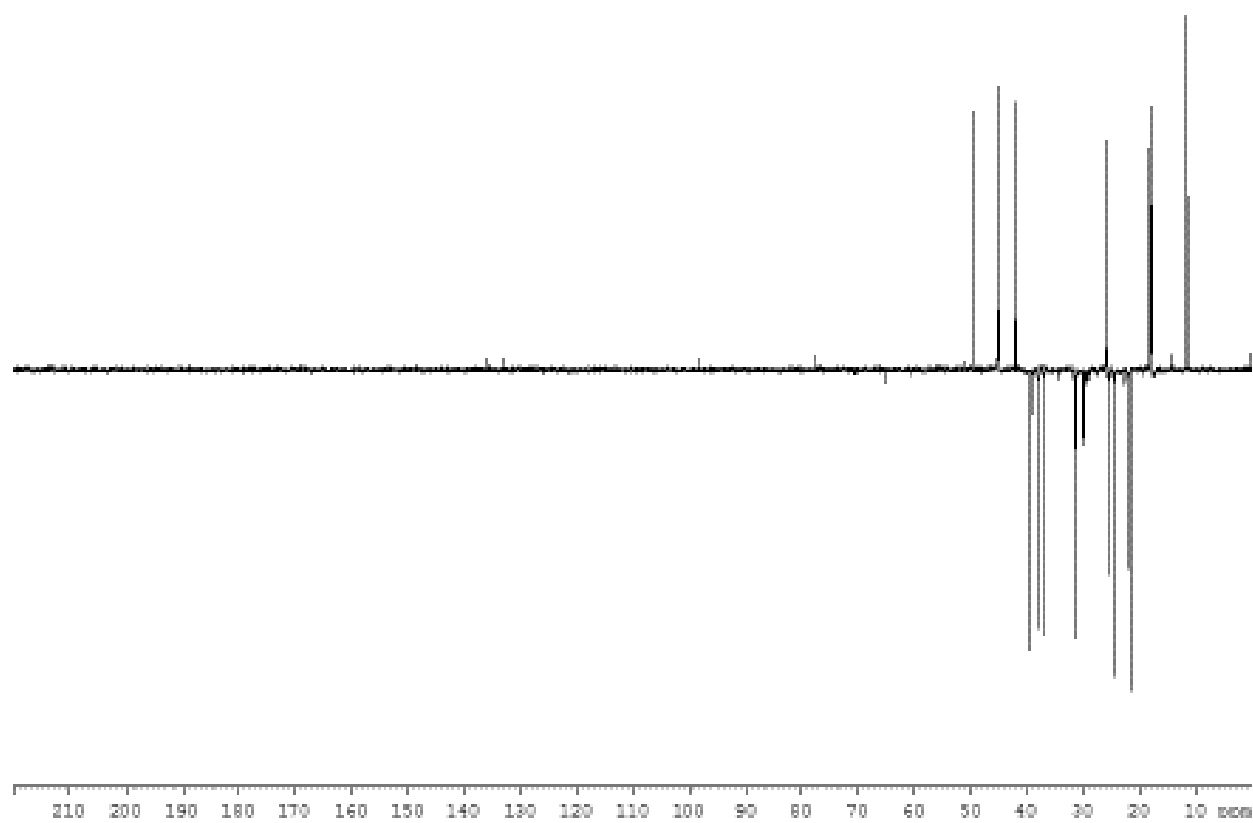

Spectrum S.3.1.5: DEPT spectrum for compound 1 in CDCl<sub>3</sub>

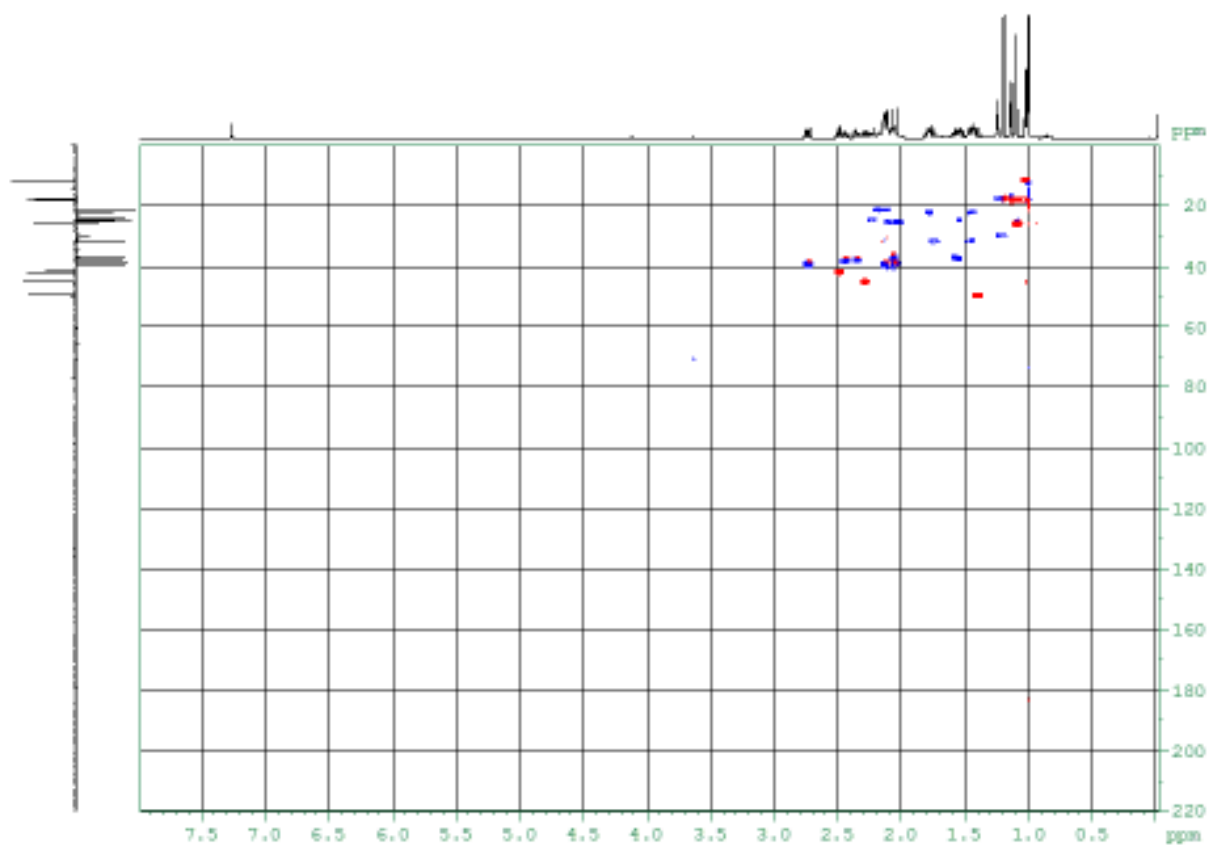

Spectrum S.3.1.6: HSQCDEPT spectrum for compound 1 in  $\text{CDCl}_3$

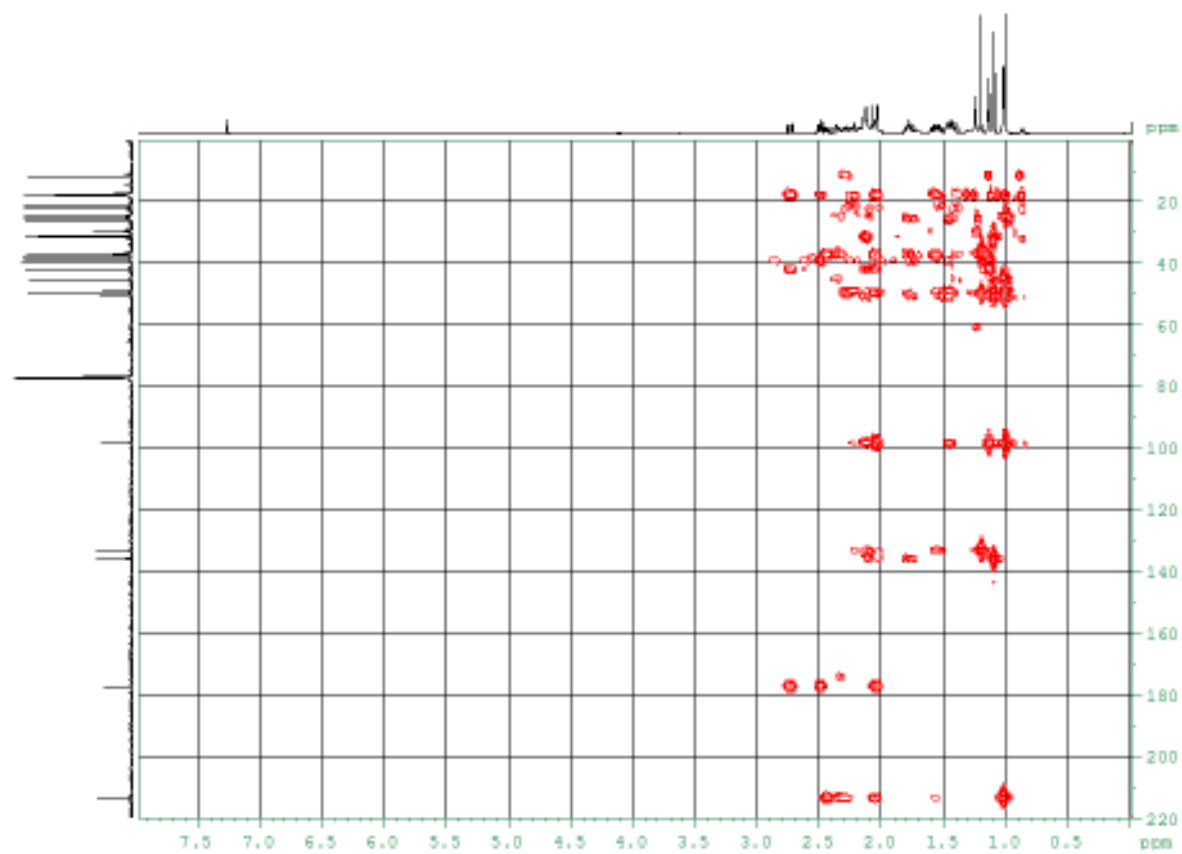

Spectrum S.3.1.7: HMBC spectrum for compound 1 in  $\text{CDCl}_3$

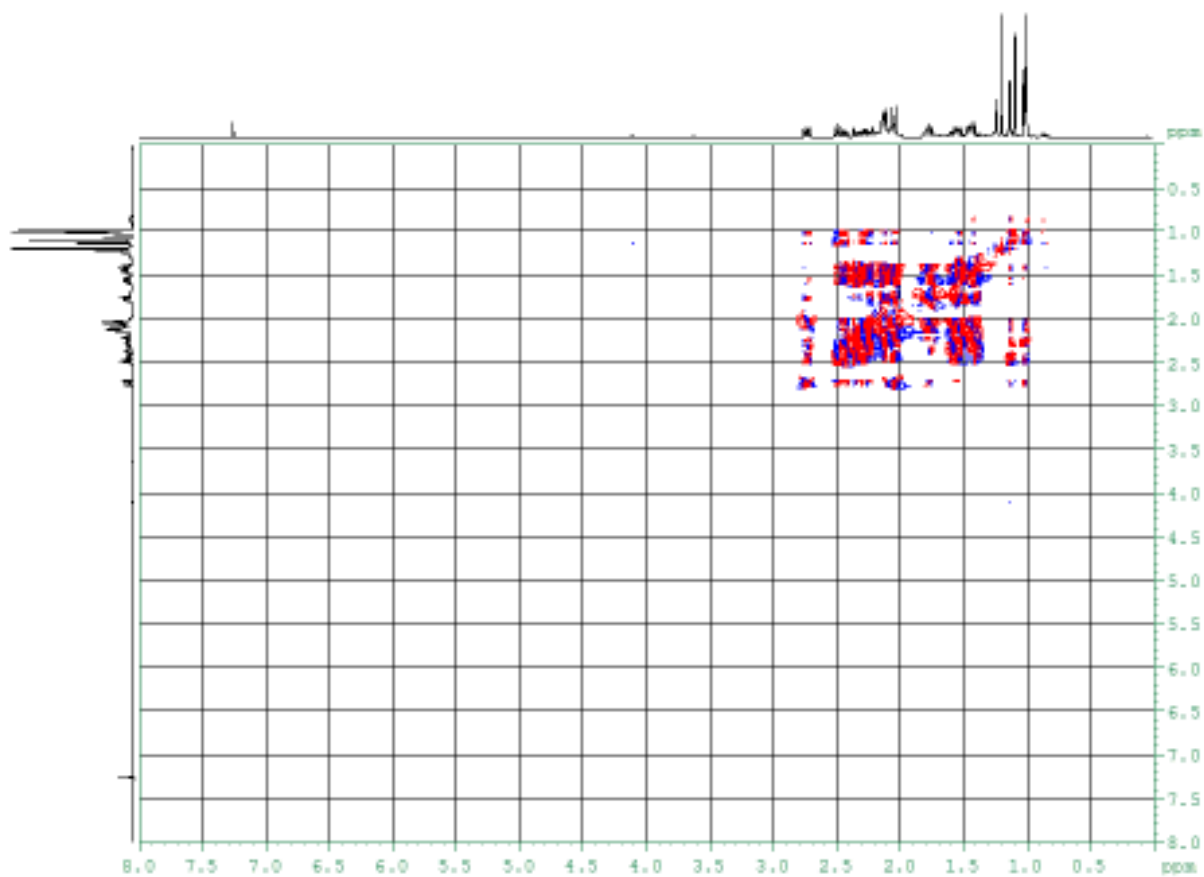

Spectrum S.3.1.8: COSY spectrum for compound 1 in CDCl<sub>3</sub>

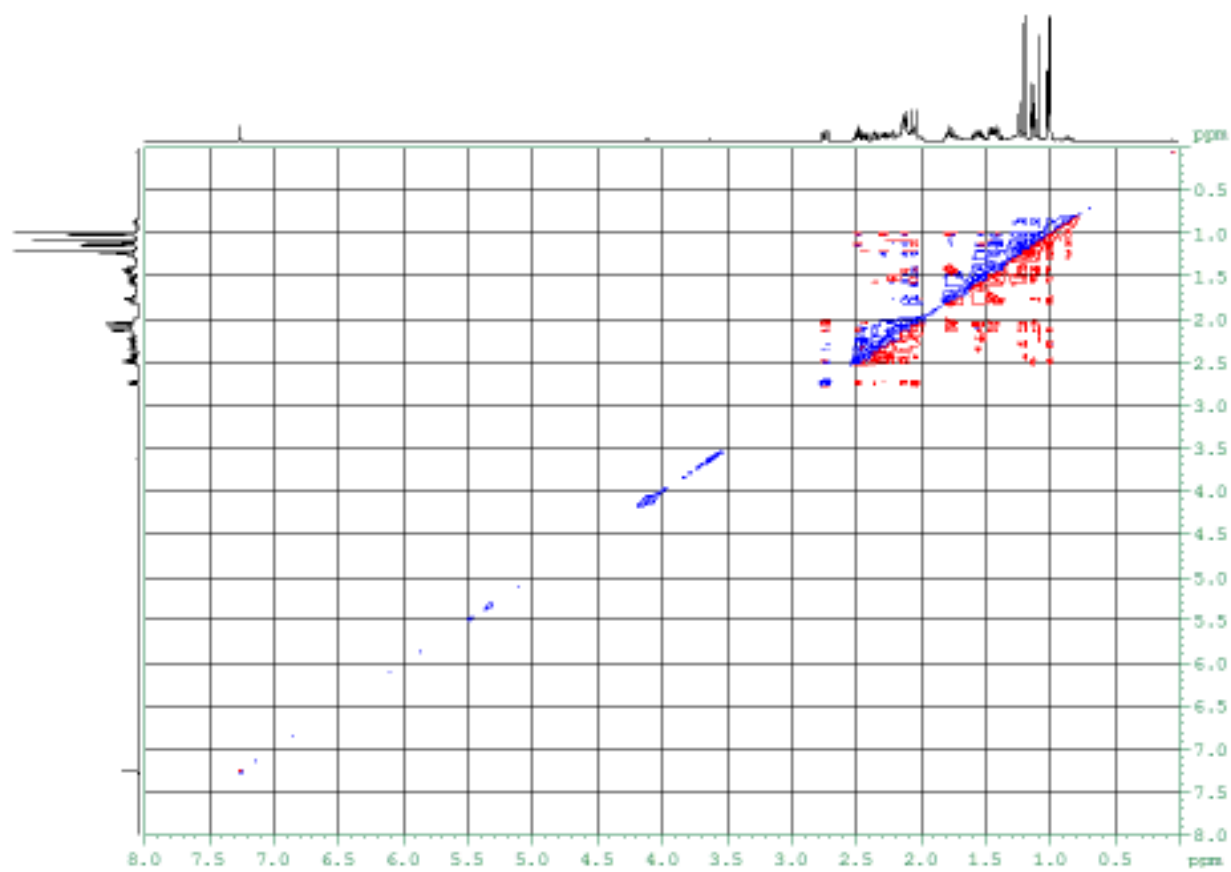

Spectrum S.3.1.9: NOESY spectrum for compound 1 in CDCl<sub>3</sub>

## Mass Spectrum SmartFormula Report

### Analysis Info

Analysis Name: Z:\Sep 11\MSS09099\_15\_01\_32454.d  
 Method: 2.5min\_cal\_sample\_pos\_Naf\_11-10-10.m  
 Sample Name: MSS09099  
 Comment:

Acquisition Date: 16/09/2011 10:34 am

Operator: Mass Spec  
 Instrument / Ser#: micrOTOF 92

### Acquisition Parameter

|             |            |                      |          |                  |            |
|-------------|------------|----------------------|----------|------------------|------------|
| Source Type | ESI        | Ion Polarity         | Positive | Set Nebulizer    | 2.0 Bar    |
| Focus       | Not active |                      |          | Set Dry Heater   | 180 °C     |
| Scan Begin  | 100 m/z    | Set Capillary        | 4500 V   | Set Dry Gas      | 10.0 l/min |
| Scan End    | 1500 m/z   | Set End Plate Offset | -500 V   | Set Divert Valve | Source     |

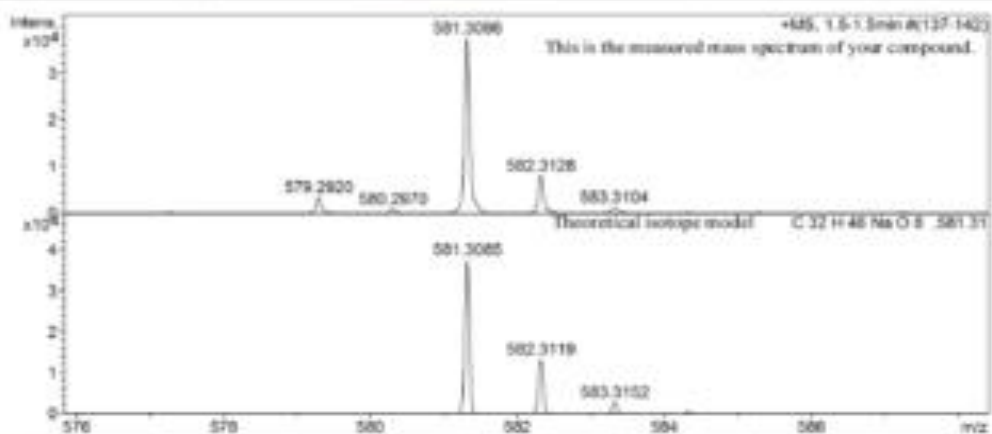

| Meas m/z | # | Formula                                          | m/z      | err [ppm] | Mean err [ppm] | rtb | e <sup>-</sup> | Conf  | mSigma |
|----------|---|--------------------------------------------------|----------|-----------|----------------|-----|----------------|-------|--------|
| 581.3086 | 1 | C <sub>32</sub> H <sub>46</sub> NaO <sub>8</sub> | 581.3085 | -1.0      | -1.6           | 9.9 | even           | 71.48 |        |

**Spectrum S.3.2.1: Mass spectrum for compound 2Ac**

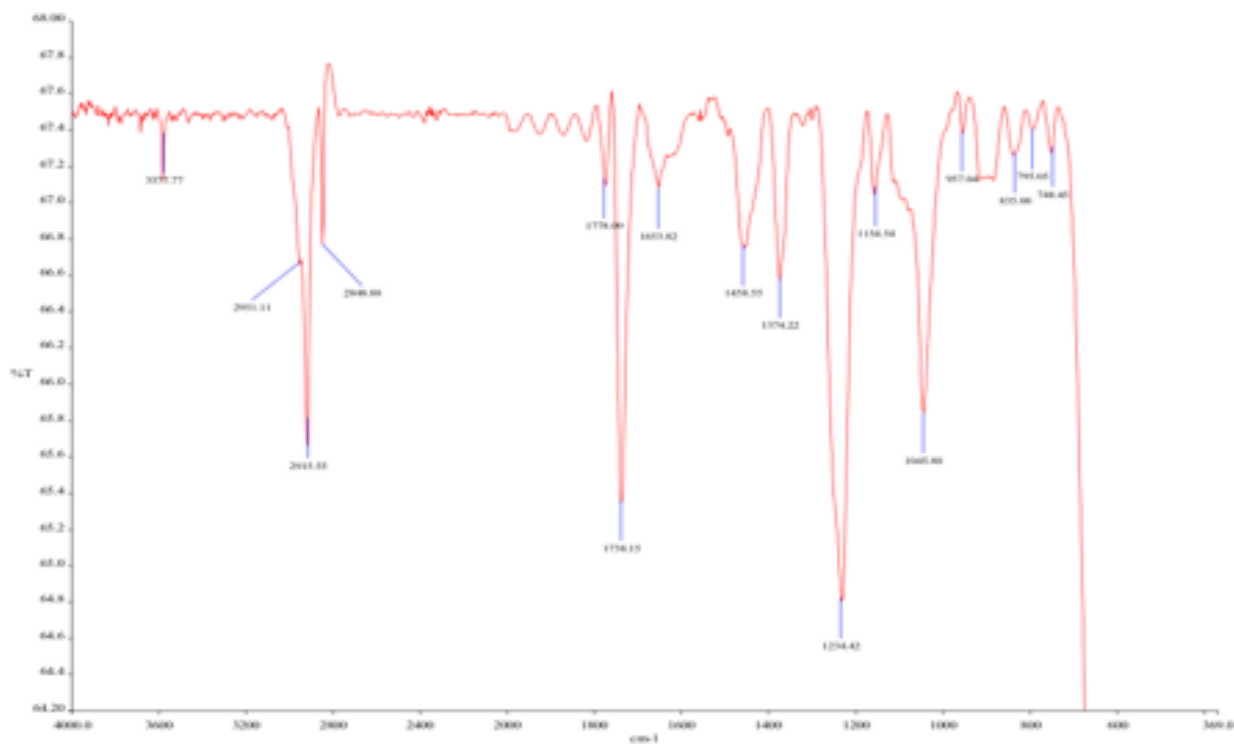

**Spectrum S.3.2.2: FTIR spectrum for compound 2Ac**



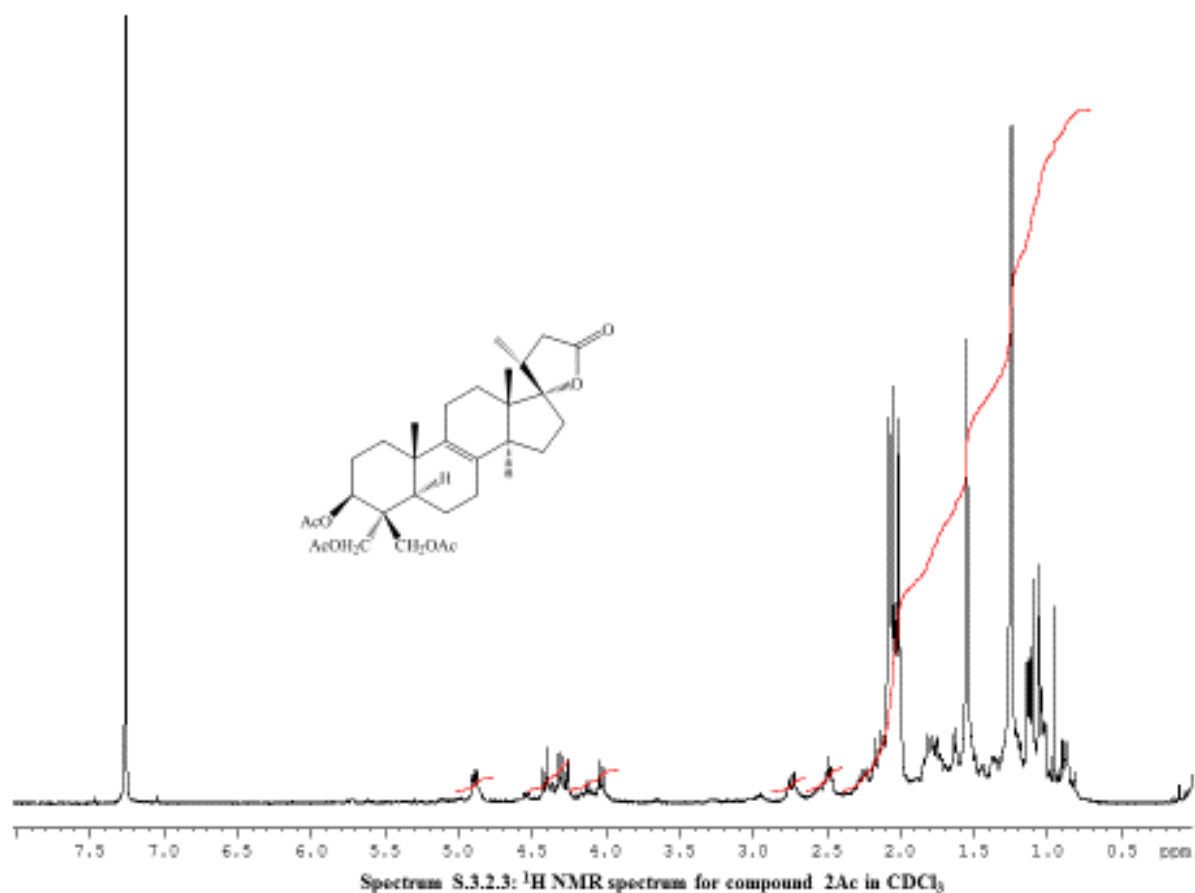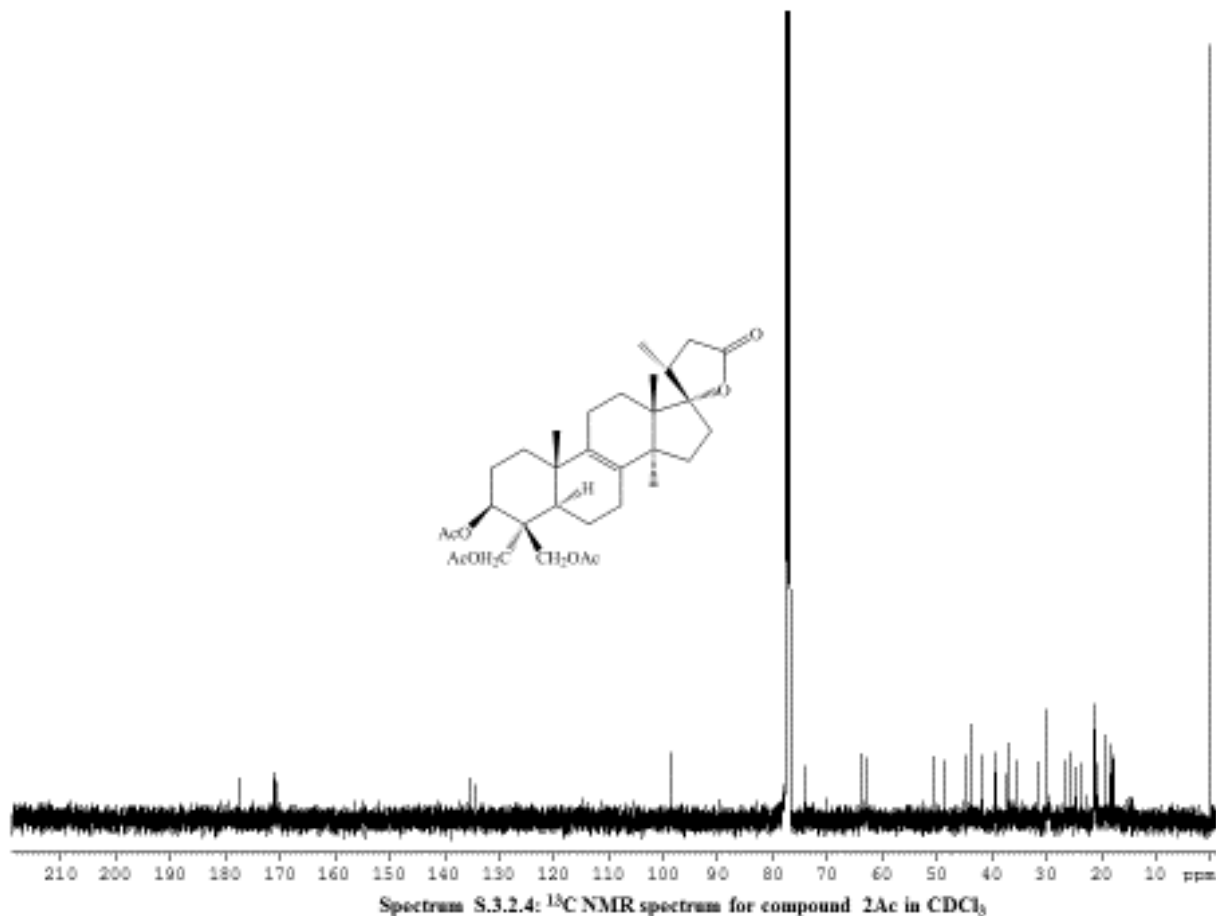

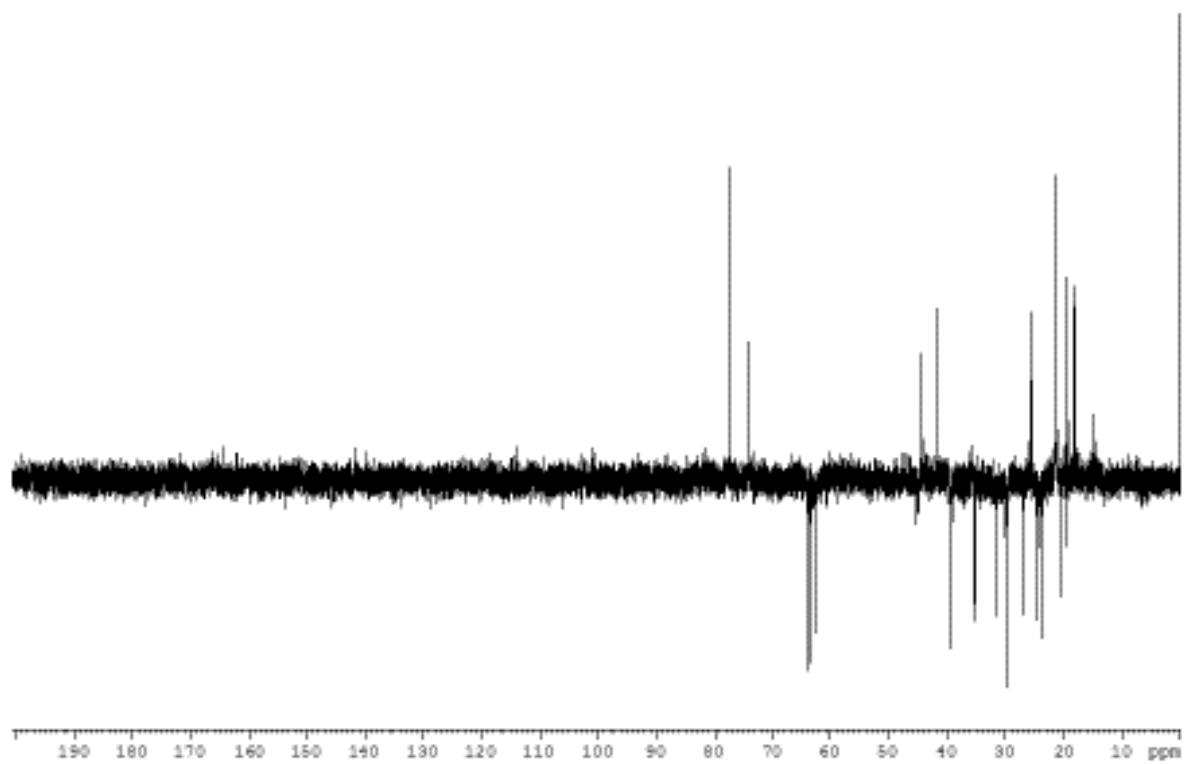

Spectrum S.3.2.5: DEPT spectrum for compound 2Ac in  $\text{CDCl}_3$

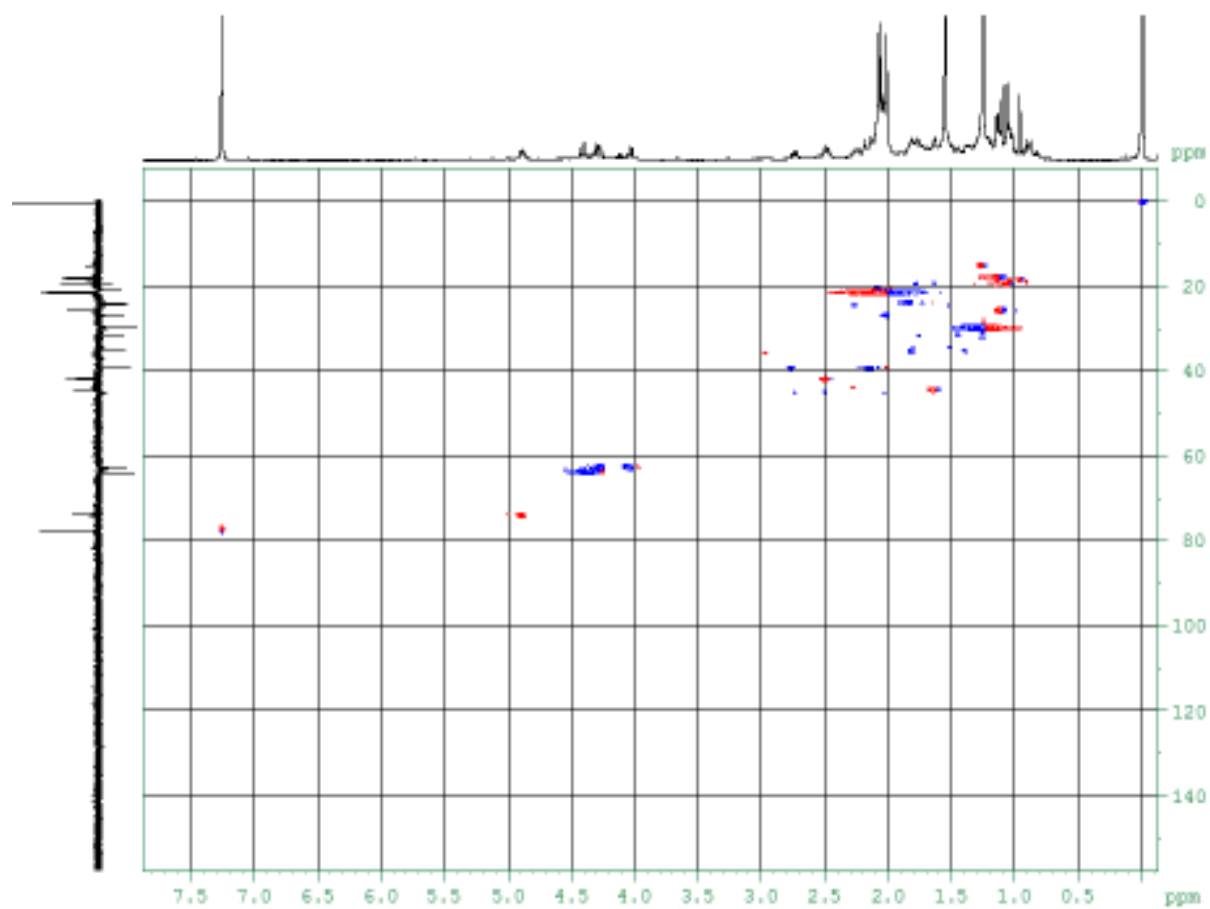

Spectrum S.3.2.6: HSQCDEPT spectrum for compound 2Ac in  $\text{CDCl}_3$

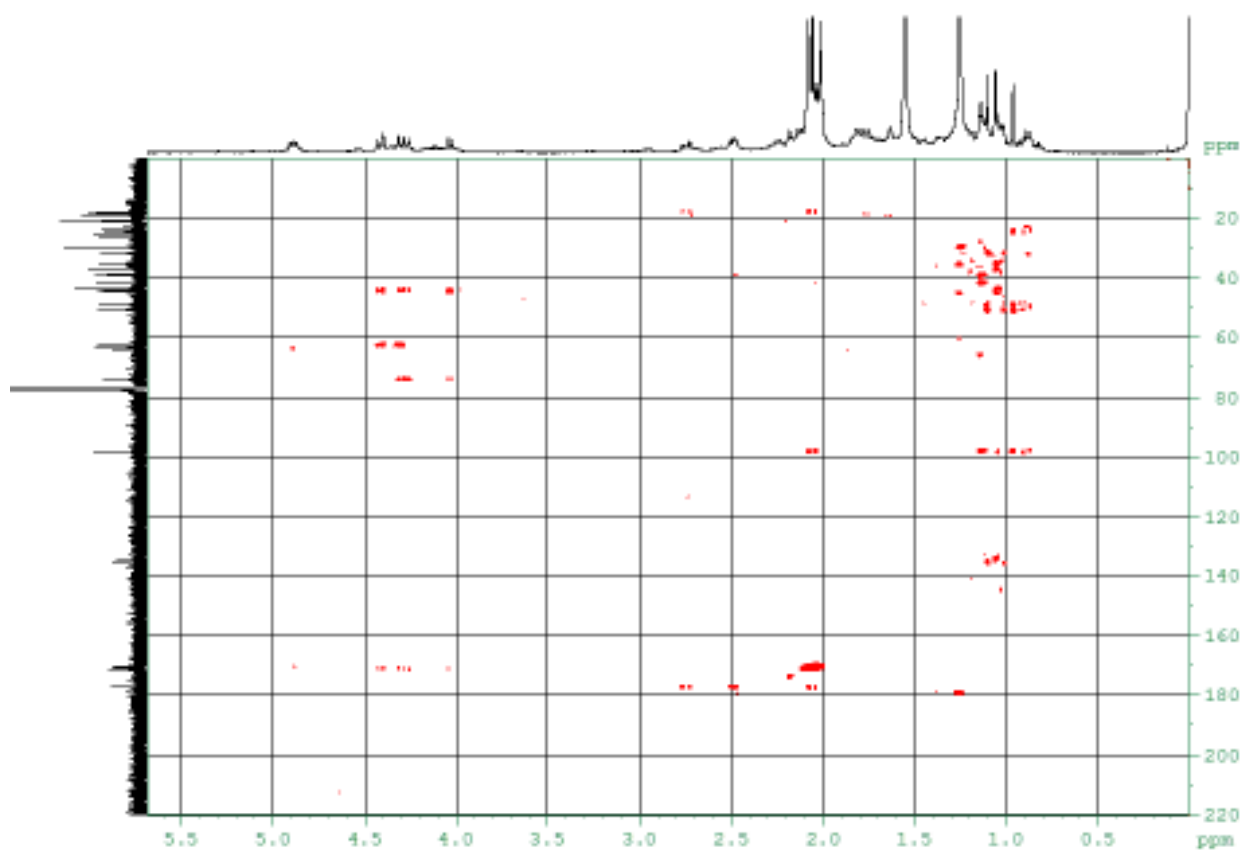

Spectrum S.3.2.7: HMBC spectrum for compound 2Ac in  $\text{CDCl}_3$

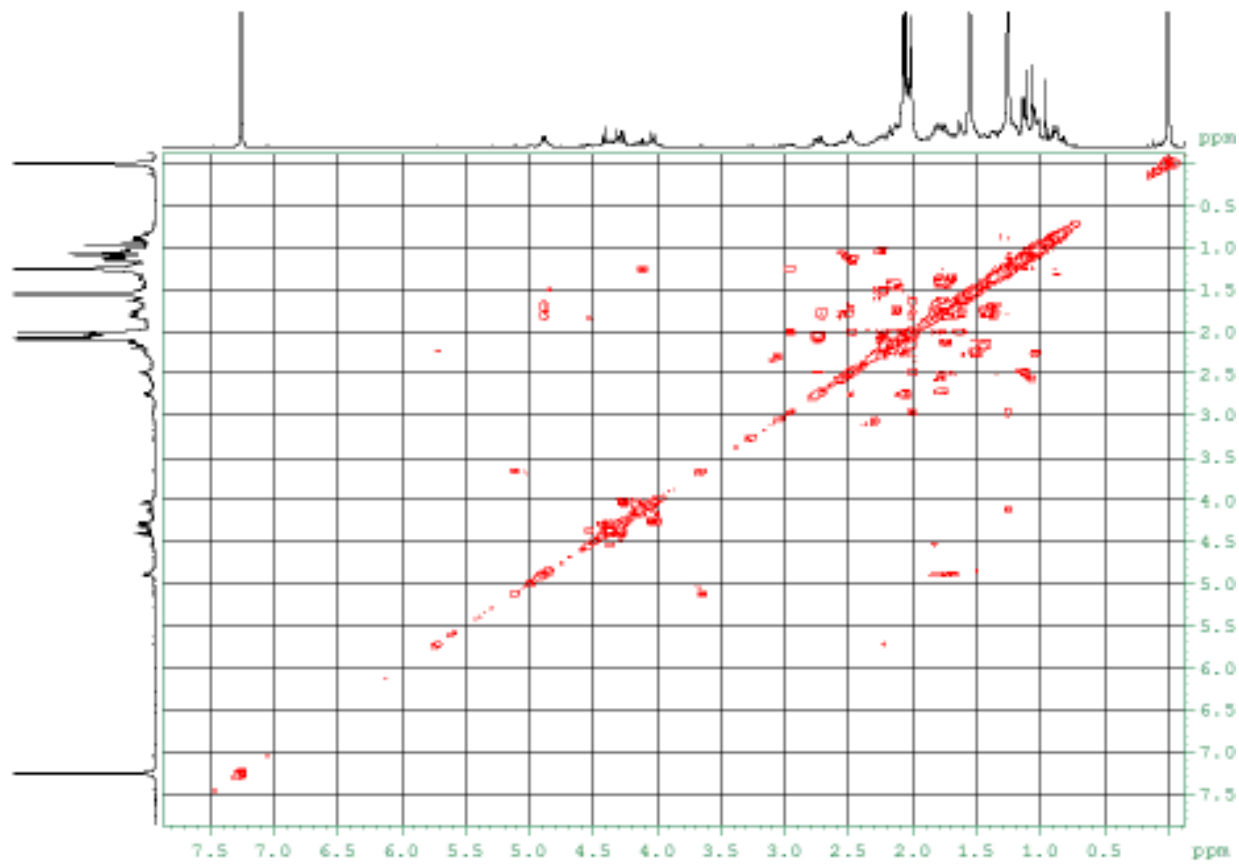

Spectrum S.3.2.8: COSY spectrum for compound 2Ac in  $\text{CDCl}_3$

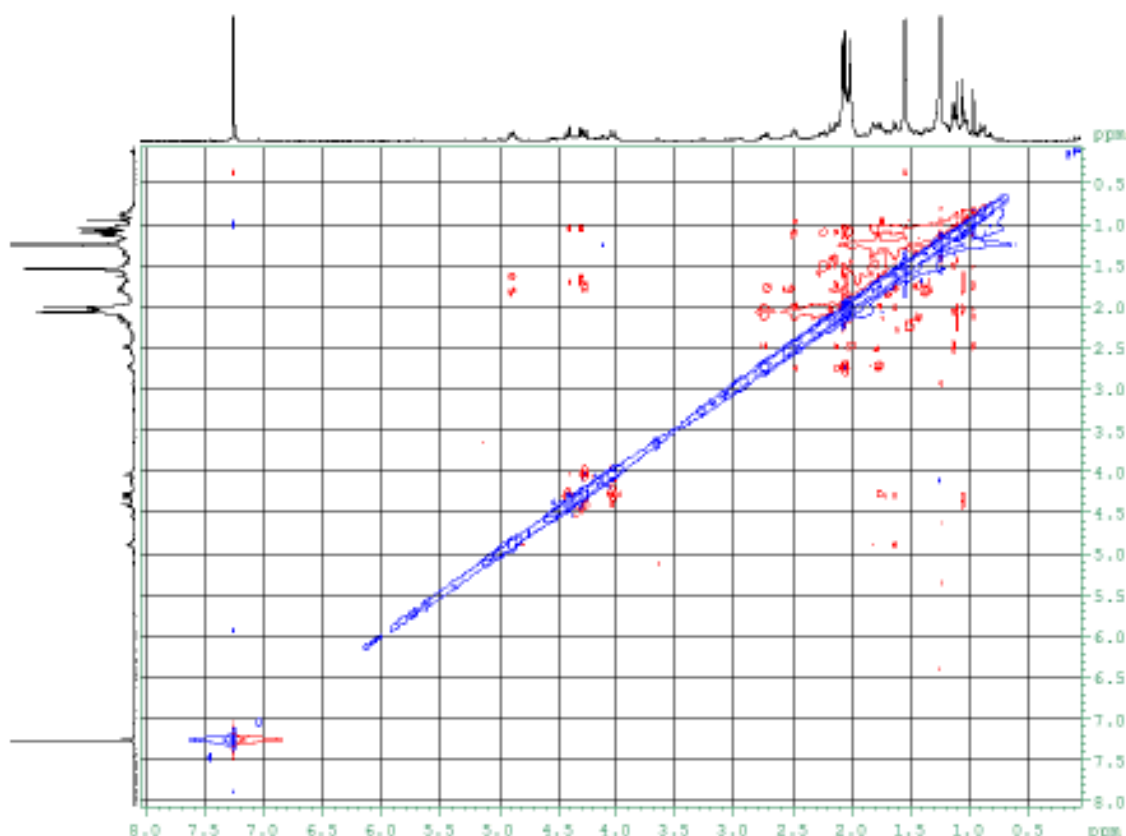

Spectrum S.3.2.9: NOESY spectrum for compound 2Ac in CDCl<sub>3</sub>

### Mass Spectrum SmartFormula Report

|                     |                                      |                   |                     |    |
|---------------------|--------------------------------------|-------------------|---------------------|----|
| <b>Analyte Info</b> |                                      | Acquisition Date  | 16/05/2011 10:52 am |    |
| Analysis Name       | Z:\May 11\MSS09133_3_01_28062.d      | Operator          | Mass Spec           |    |
| Method              | 2.5min_pul_sample_pos_NaI_11-10-10.m | Instrument / Ser# | micrOTOF            | 92 |
| Sample Name         | MSS09133                             | Comment:          |                     |    |

|                              |            |                      |          |                 |            |
|------------------------------|------------|----------------------|----------|-----------------|------------|
| <b>Acquisition Parameter</b> |            |                      |          |                 |            |
| Source Type                  | ESI        | Ion Polarity         | Positive | Set Nebulizer   | 2.0 Bar    |
| Focus                        | Not active |                      |          | Set Dry Heater  | 180 °C     |
| Scan Begin                   | 500 m/z    | Set Capillary        | 4500 V   | Set Dry Gas     | 10.0 l/min |
| Scan End                     | 1000 m/z   | Set End Plate Offset | -500 V   | Set Shunt Valve | Source     |

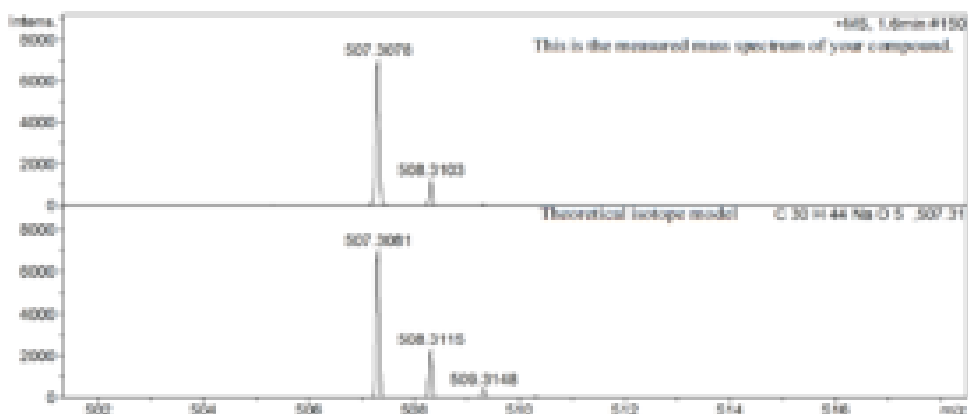

| Meas. m/z | # | Formula                                          | m/z      | err (ppm) | Mean err (ppm) | relb | e <sup>-</sup> | Conf | mSigma |
|-----------|---|--------------------------------------------------|----------|-----------|----------------|------|----------------|------|--------|
| 507.3079  | 1 | C <sub>30</sub> H <sub>44</sub> NaO <sub>5</sub> | 507.3081 | 0.5       | 0.8            | 0.5  | even           |      | 80.97  |

Spectrum S.3.3.1: Mass spectrum for compound 3

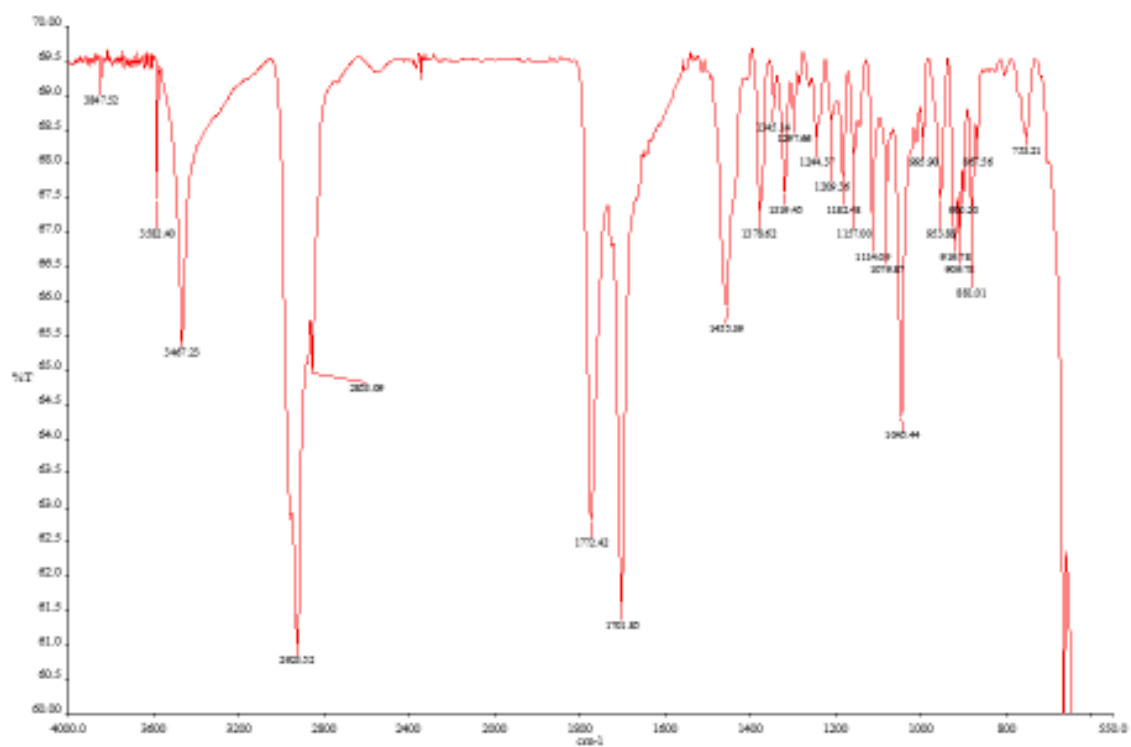

Spectrum S.3.3.2: FTIR spectrum for compound 3

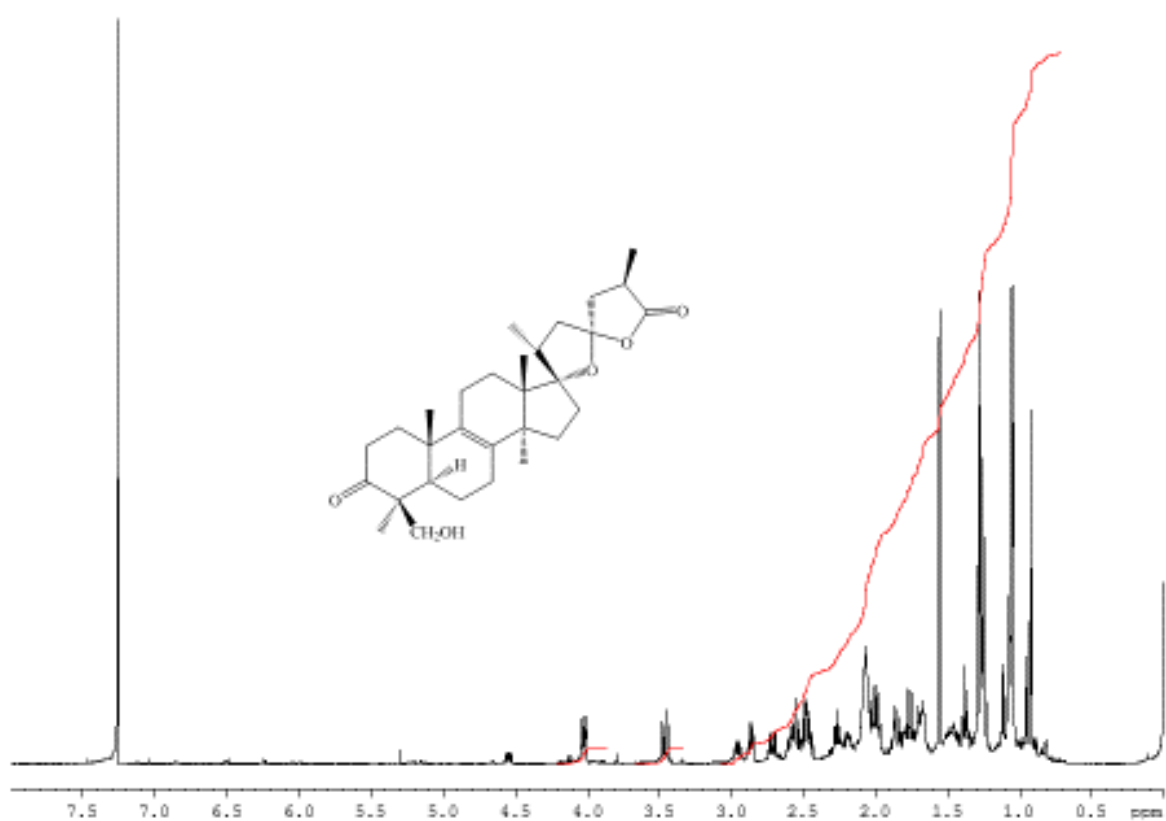

Spectrum S.3.3.3: <sup>1</sup>H NMR spectrum for compound 3 in CDCl<sub>3</sub>

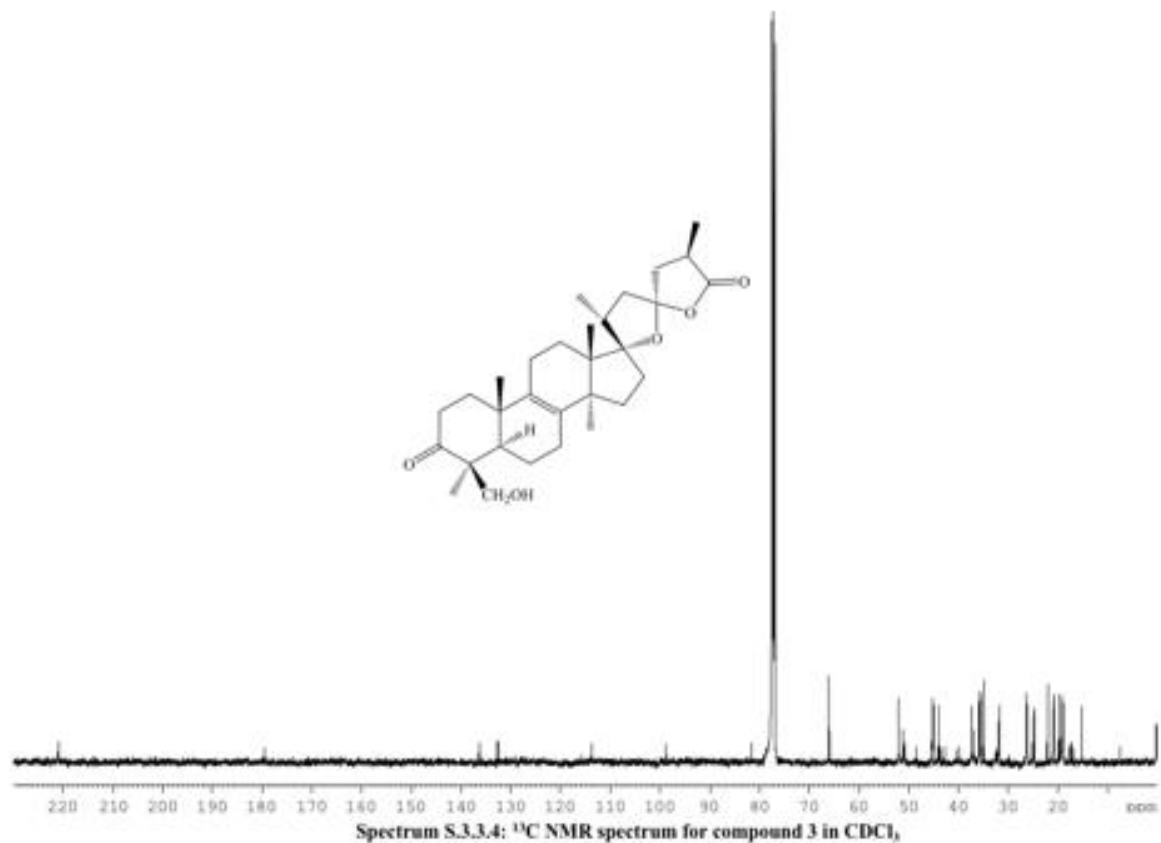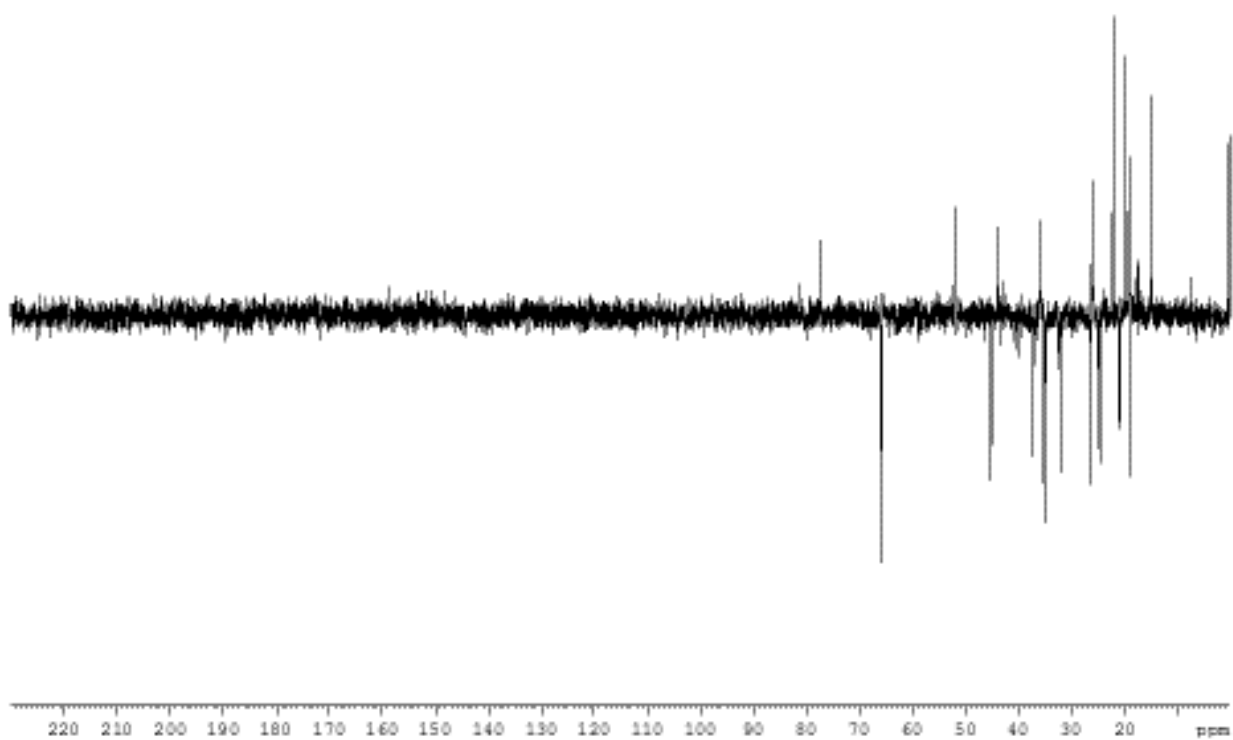

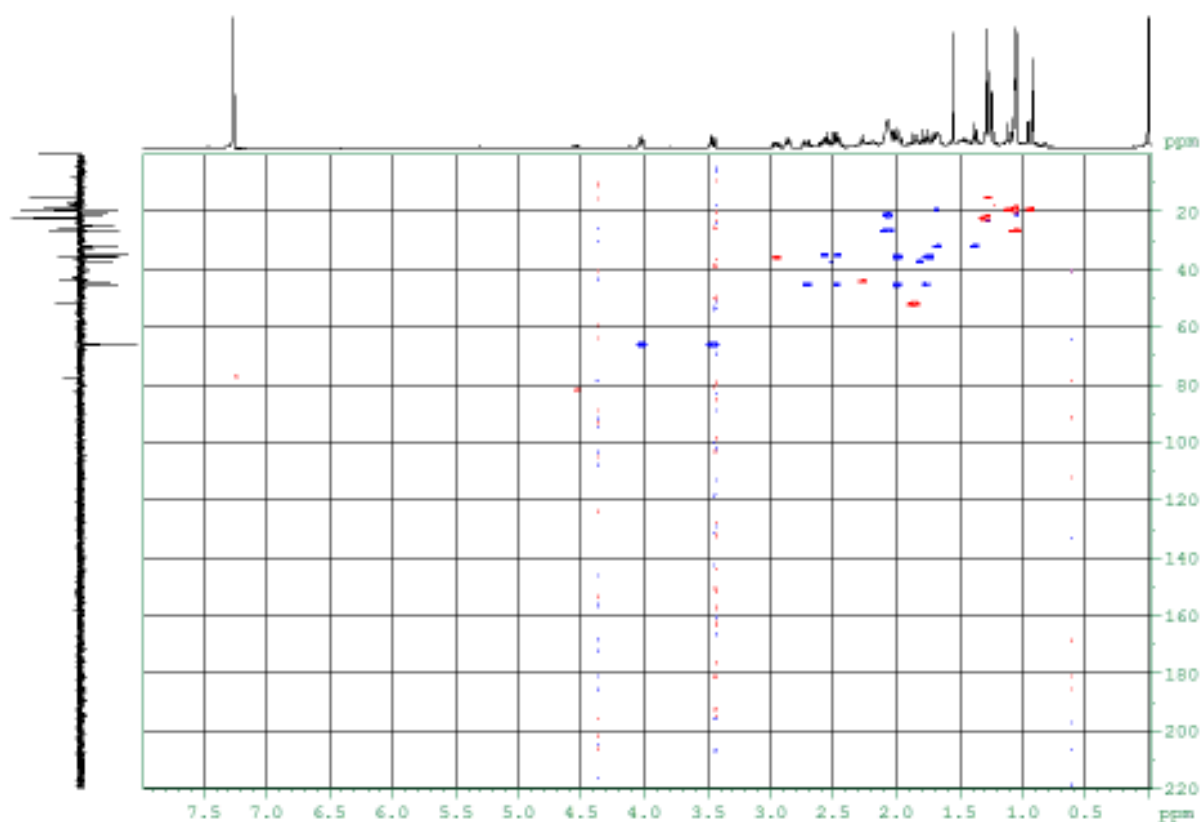

Spectrum S.3.3.6: HSQCDEPT spectrum for compound 3 in CDCl<sub>3</sub>

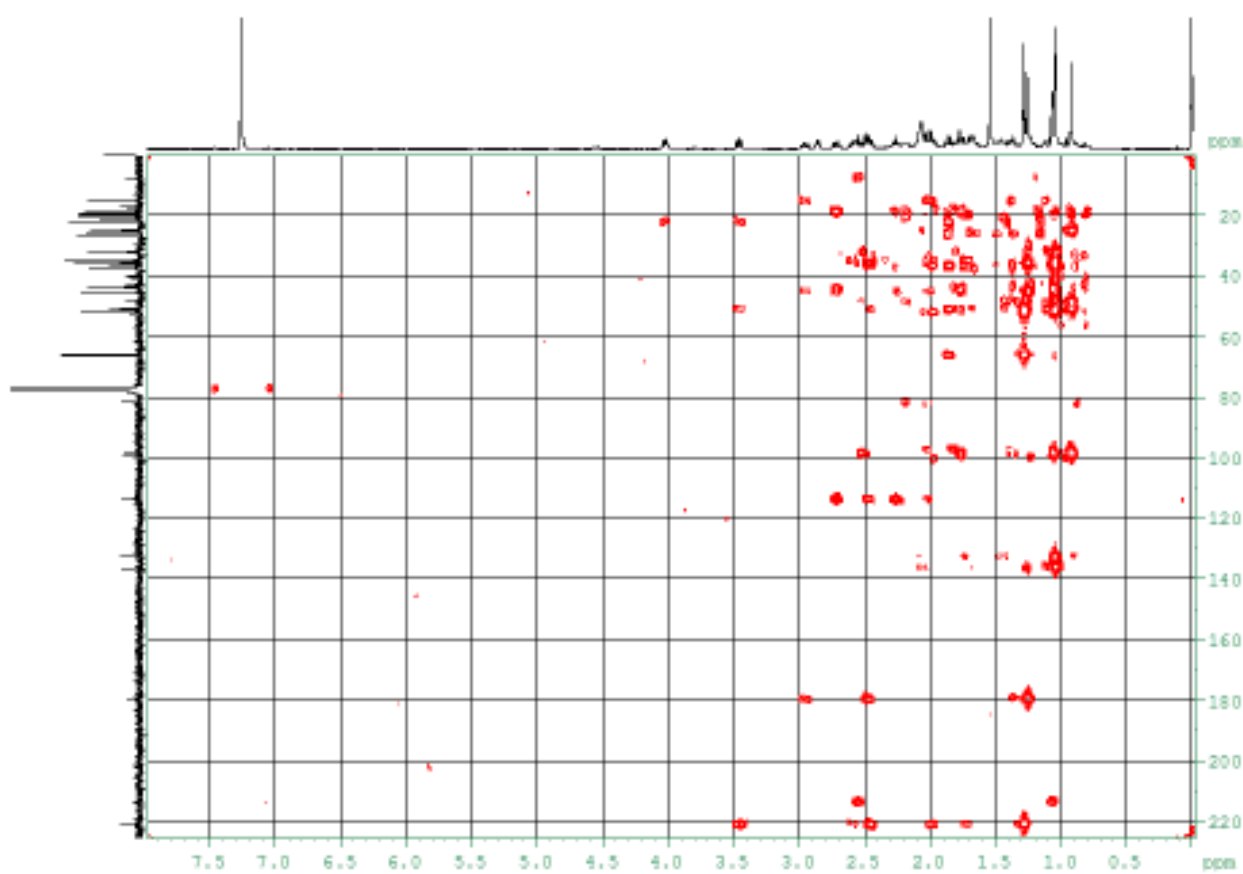

Spectrum S.3.3.7: HMBC spectrum for compound 3 in CDCl<sub>3</sub>

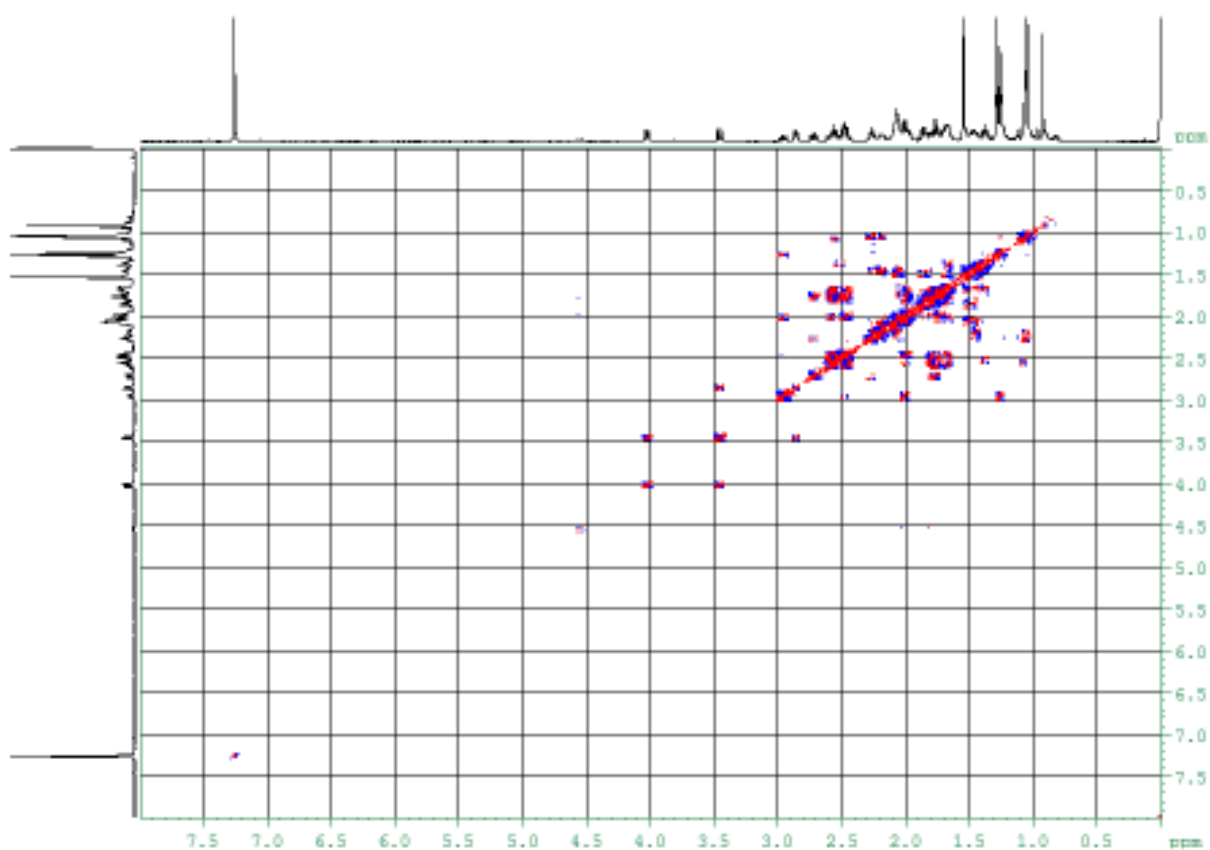

Spectrum S.3.3.8: COSY spectrum for compound 3 in  $\text{CDCl}_3$

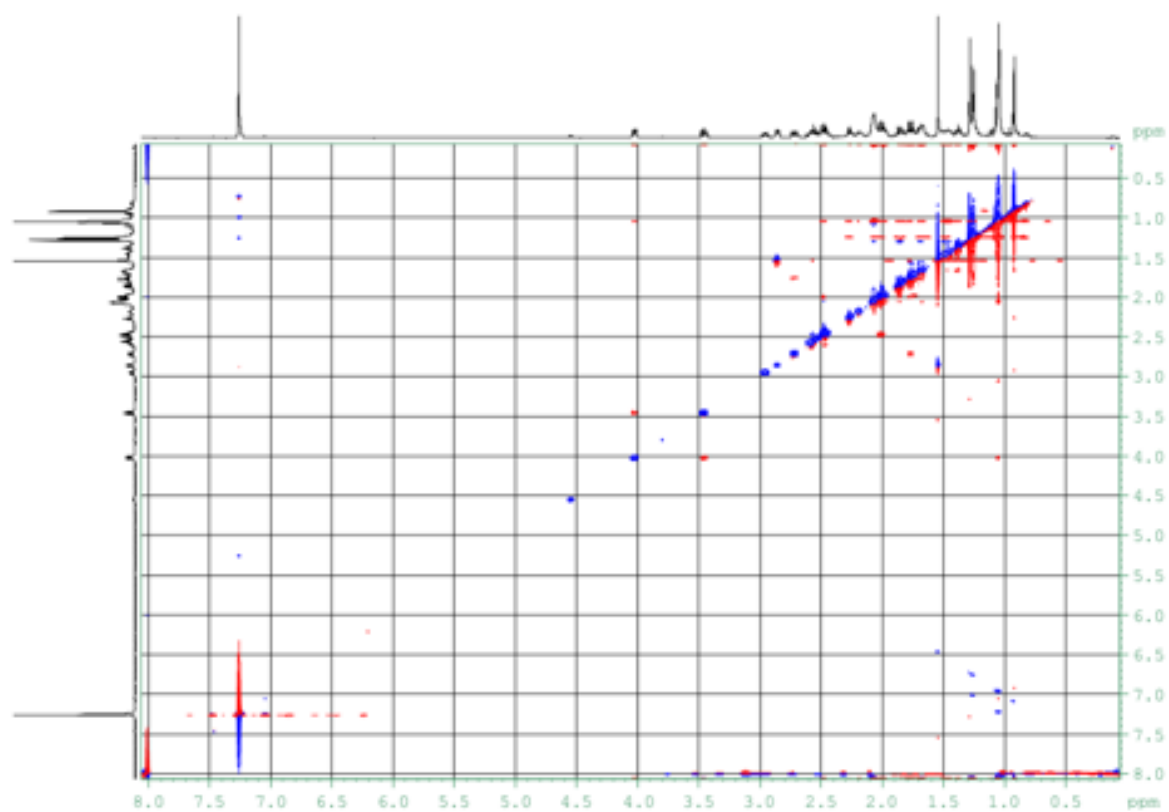

Spectrum S.3.3.9: NOESY spectrum for compound 3 in  $\text{CDCl}_3$



## Mass Spectrum SmartFormula Report

|                      |                                      |                   |                     |
|----------------------|--------------------------------------|-------------------|---------------------|
| <b>Analysis Info</b> |                                      | Acquisition Date  | 15/05/2011 10:45 am |
| Analysis Name        | Z:\May 11\MSS09131_1_01_28060.d      | Operator          | Mass Spec           |
| Method               | 2.5min_cal_sample_pos_Naf_11-10-10.m | Instrument / Set# | micrOTOF 92         |
| Sample Name          | MSS09131                             |                   |                     |
| Comment              |                                      |                   |                     |

|                              |            |                      |          |                  |            |
|------------------------------|------------|----------------------|----------|------------------|------------|
| <b>Acquisition Parameter</b> |            |                      |          |                  |            |
| Source Type                  | ESI        | Ion Polarity         | Positive | Set Nebulizer    | 2.0 Bar    |
| Focus                        | Not active |                      |          | Set Dry Heater   | 150 °C     |
| Scan Begin                   | 100 m/z    | Set Capillary        | 4500 V   | Set Dry Gas      | 10.0 liter |
| Scan End                     | 1550 m/z   | Set End Plate Offset | -500 V   | Set Divert Valve | Source     |

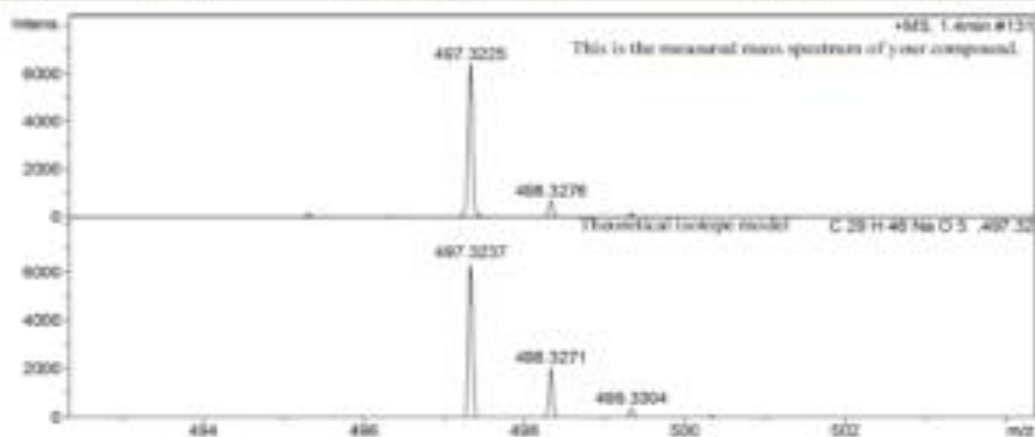

| Mass. m/z | # | Formula                                          | m/z      | err [ppm] | Mean err [ppm] | relb | e <sup>-</sup> | Conf | mSigma |
|-----------|---|--------------------------------------------------|----------|-----------|----------------|------|----------------|------|--------|
| 497.3225  | 1 | C <sub>29</sub> H <sub>46</sub> NaO <sub>5</sub> | 497.3237 | 2.4       | 2.1            | 5.5  | even           |      | 108.73 |

**Spectrum S.3.4.1: Mass spectrum for compound 4**

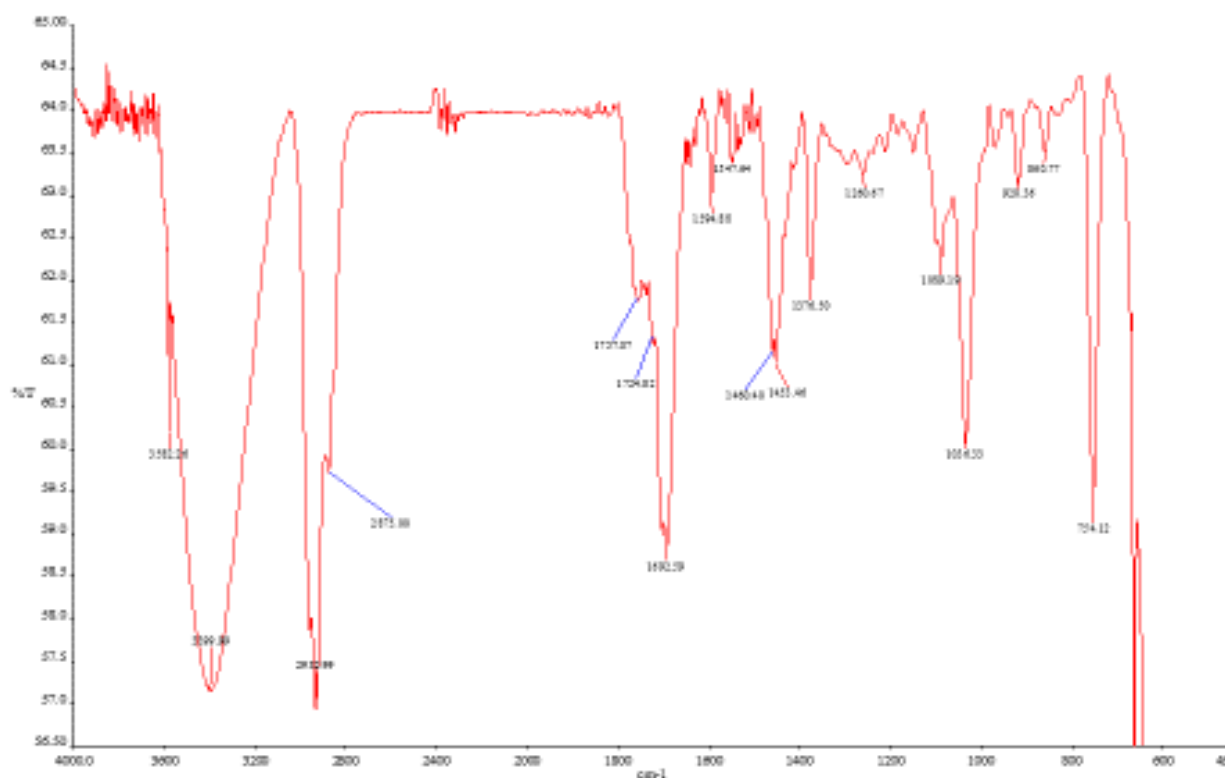

**Spectrum S.3.4.2: FTIR spectrum for compound 4**

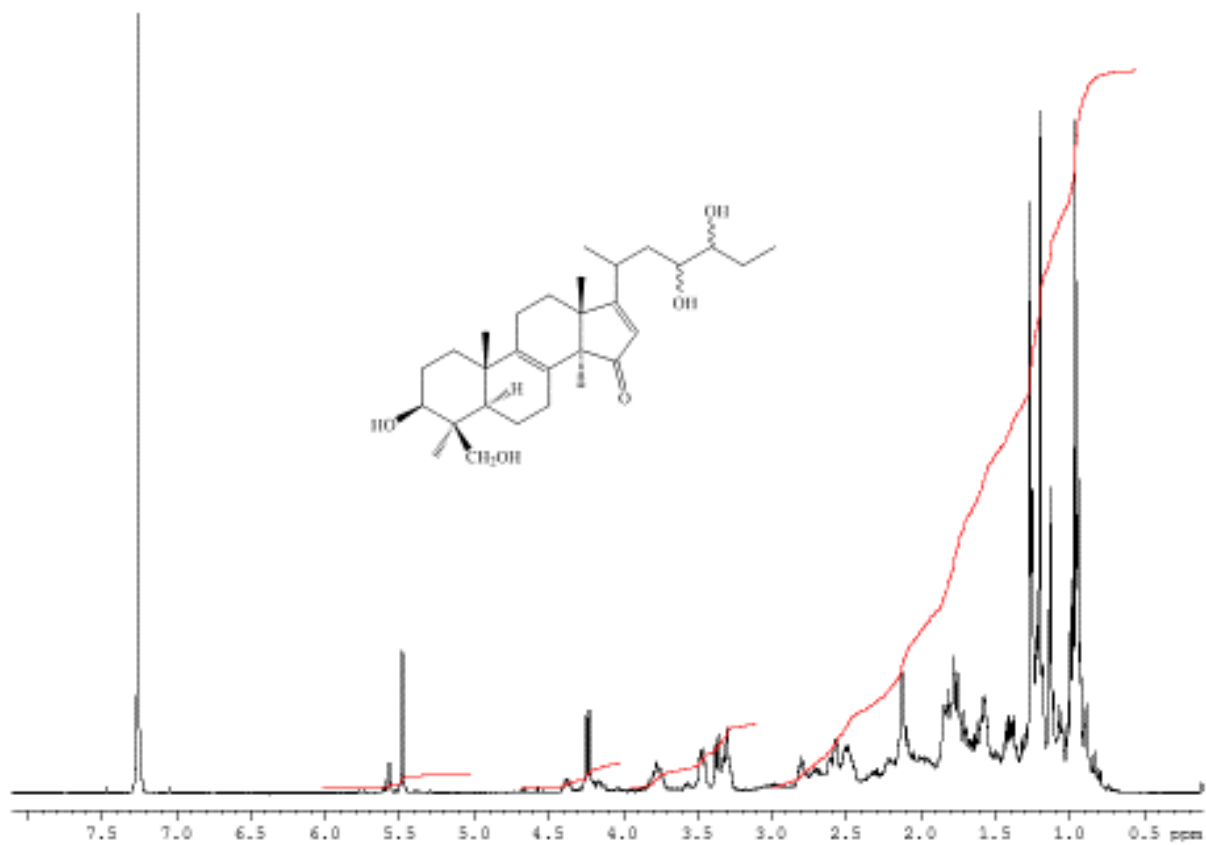

Spectrum S.3.4.3: <sup>1</sup>H NMR spectrum for compound 4 in CDCl<sub>3</sub>

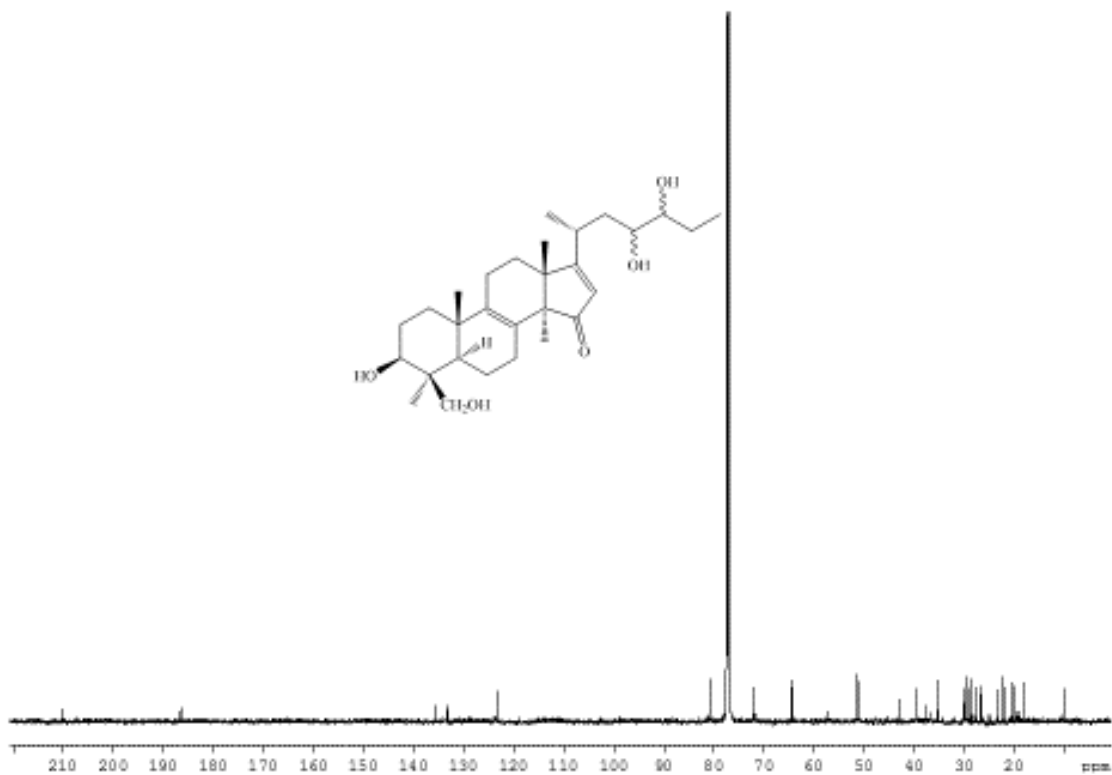

Spectrum S.3.4.3: <sup>13</sup>C NMR spectrum for compound 4 in CDCl<sub>3</sub>

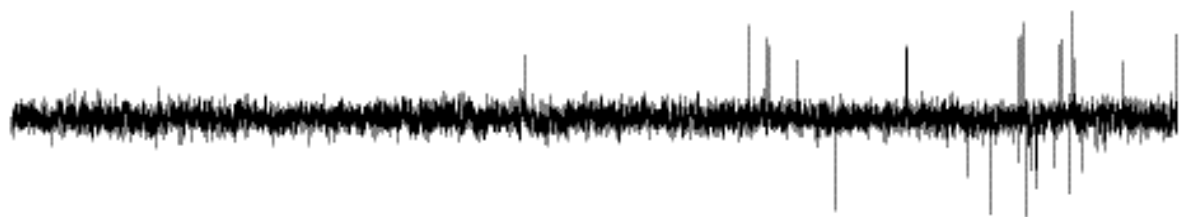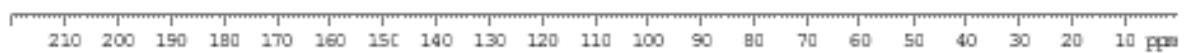

Spectrum S.3.4.4: DEPT spectrum for compound 4 in  $\text{CDCl}_3$

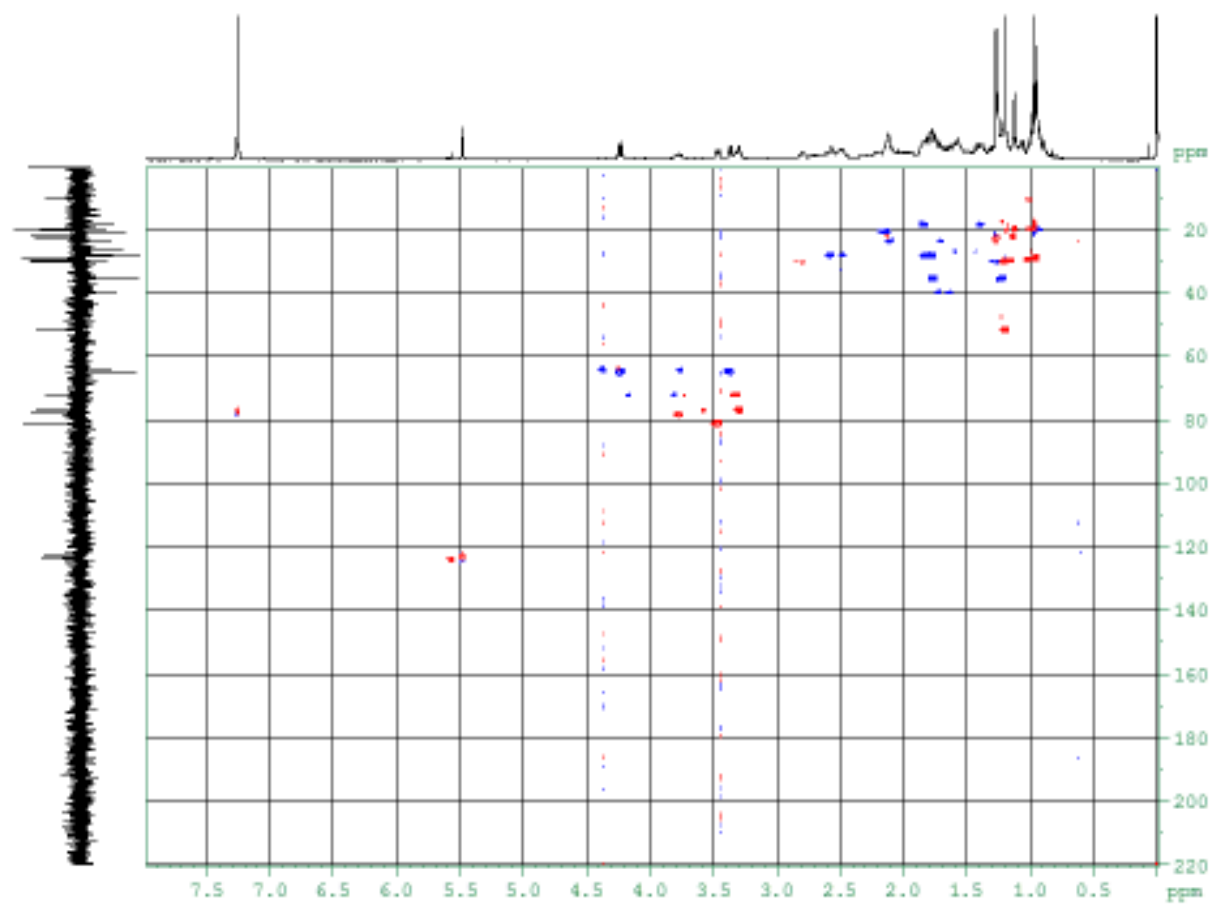

Spectrum S.3.4.6: HSQCDEPT spectrum for compound 4 in  $\text{CDCl}_3$

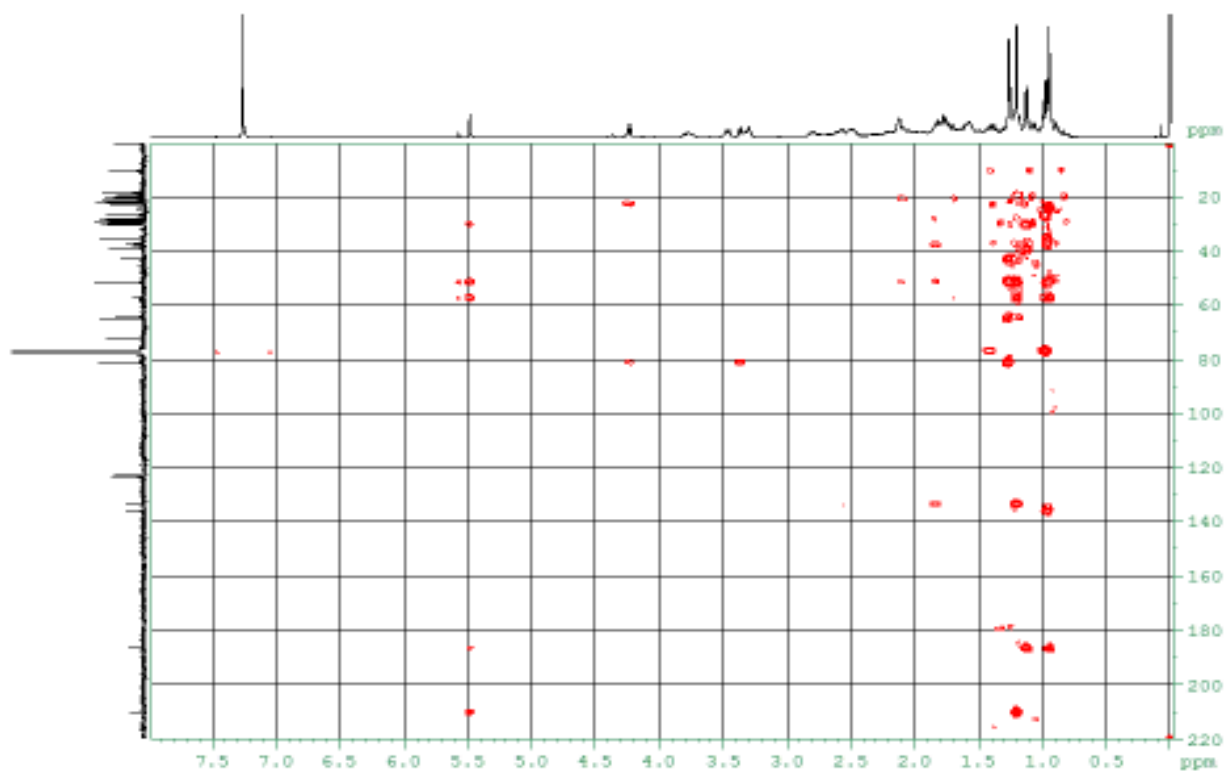

Spectrum S.3.4.7: HMBC spectrum for compound 4 in CDCl<sub>3</sub>

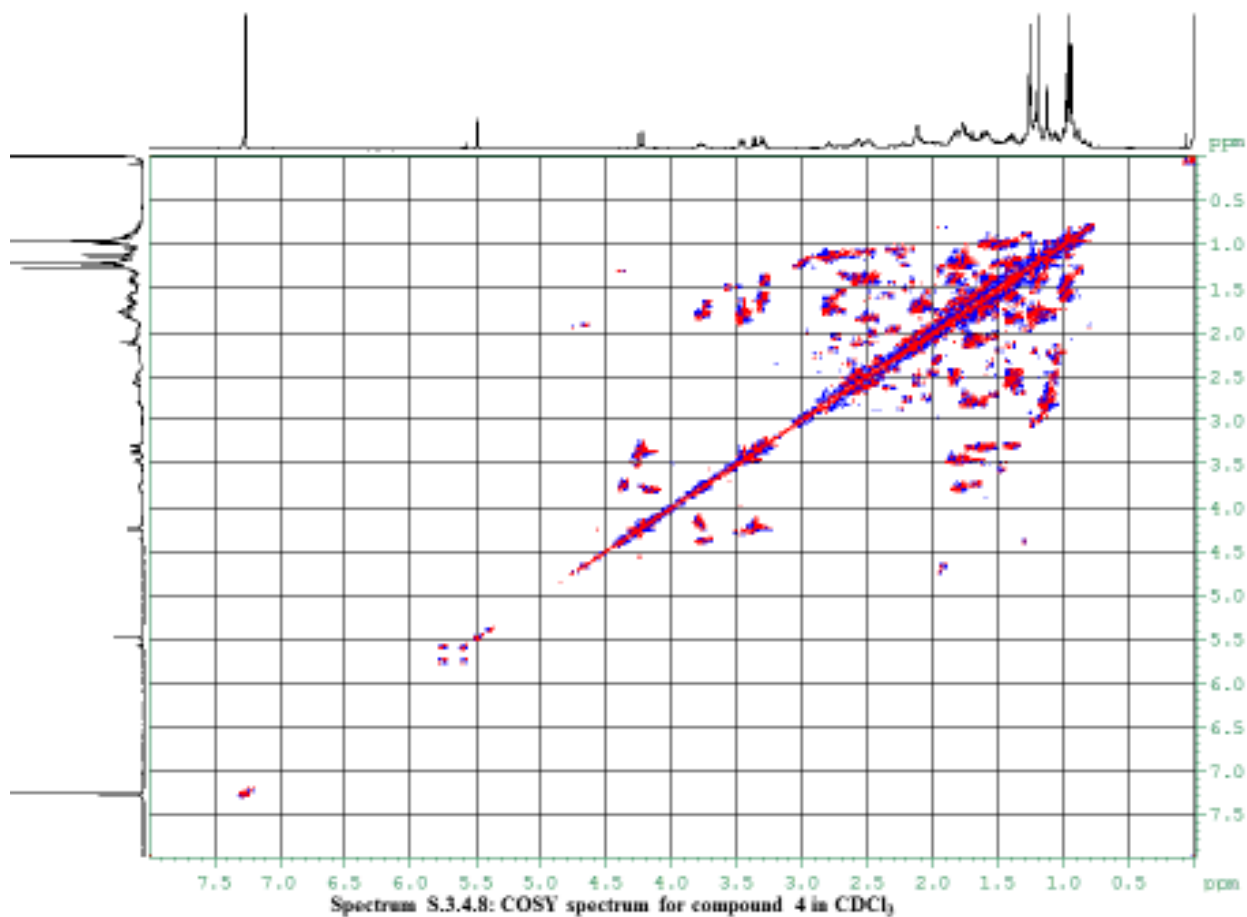

Spectrum S.3.4.8: COSY spectrum for compound 4 in CDCl<sub>3</sub>

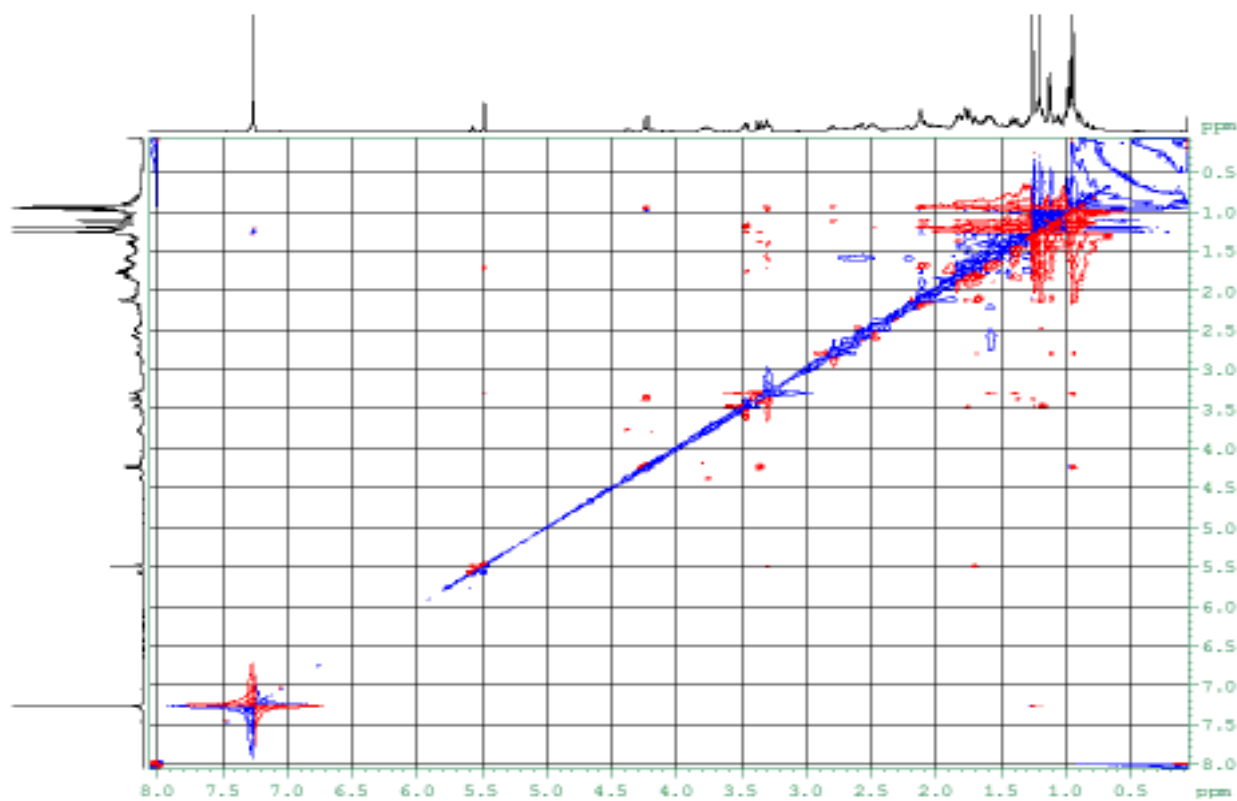

Spectrum S.3.4.9: NOESY spectrum for compound 4 in CDCl<sub>3</sub>

## Mass Spectrum SmartFormula Report

|                                               |                                      |
|-----------------------------------------------|--------------------------------------|
| <b>Analysis Info</b>                          | Acquisition Date 15/05/2011 10:49 am |
| Analysis Name Z:\May 11\MSS06132_2_01_28061.d | Operator                             |
| Method 2.5min_cal_sample_pos_Naf_11-10-10.m   | Mass Spec                            |
| Sample Name MSS06132                          | Instrument / Set# micrOTOF 82        |
| Comment                                       |                                      |

|                              |            |                      |          |                  |            |
|------------------------------|------------|----------------------|----------|------------------|------------|
| <b>Acquisition Parameter</b> |            |                      |          |                  |            |
| Source Type                  | ESI        | Ion Polarity         | Positive | Set Nebulizer    | 2.0 Bar    |
| Focus                        | Not active |                      |          | Set Dry Heater   | 180 °C     |
| Scan Begin                   | 100 m/z    | Set Capillary        | 4500 V   | Set Dry Gas      | 10.0 L/min |
| Scan End                     | 1500 m/z   | Set End Plate Offset | -500 V   | Set Divert Valve | Source     |

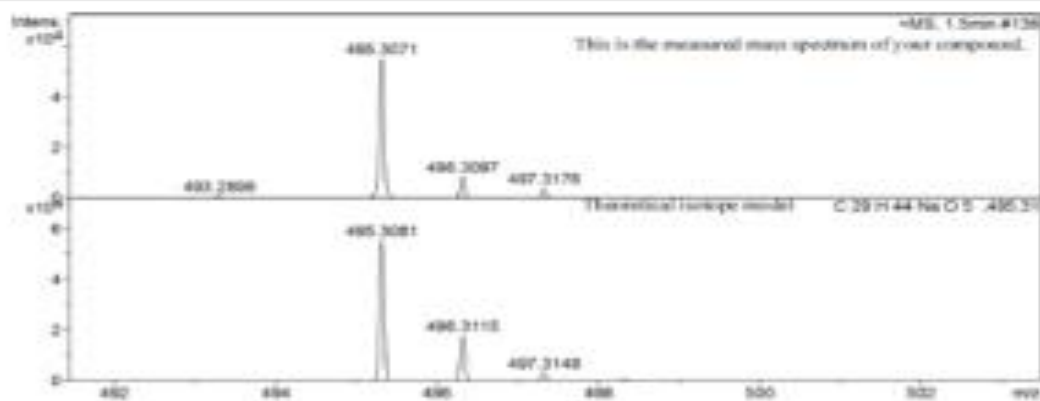

| Meas. m/z | # | Formula                                          | m/z      | err (ppm) | Mean err (ppm) | rdB | e <sup>-</sup> Conf | rcSigma |
|-----------|---|--------------------------------------------------|----------|-----------|----------------|-----|---------------------|---------|
| 495.3071  | 1 | C <sub>29</sub> H <sub>44</sub> NaO <sub>5</sub> | 495.3081 | 2.1       | 1.8            | 7.5 | even                | 82.13   |

**Spectrum S.3.5.1: Mass spectrum for compound 5**

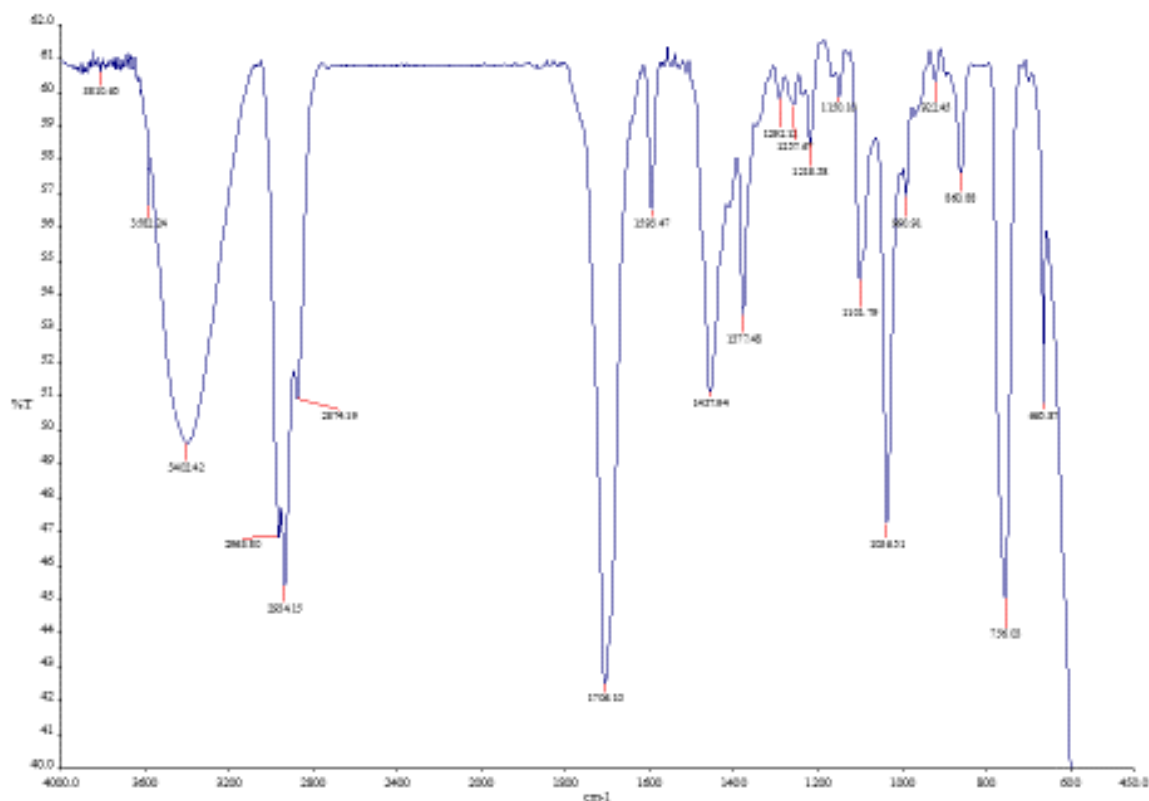

**Spectrum S.3.5.2: FTIR spectrum for compound 5**

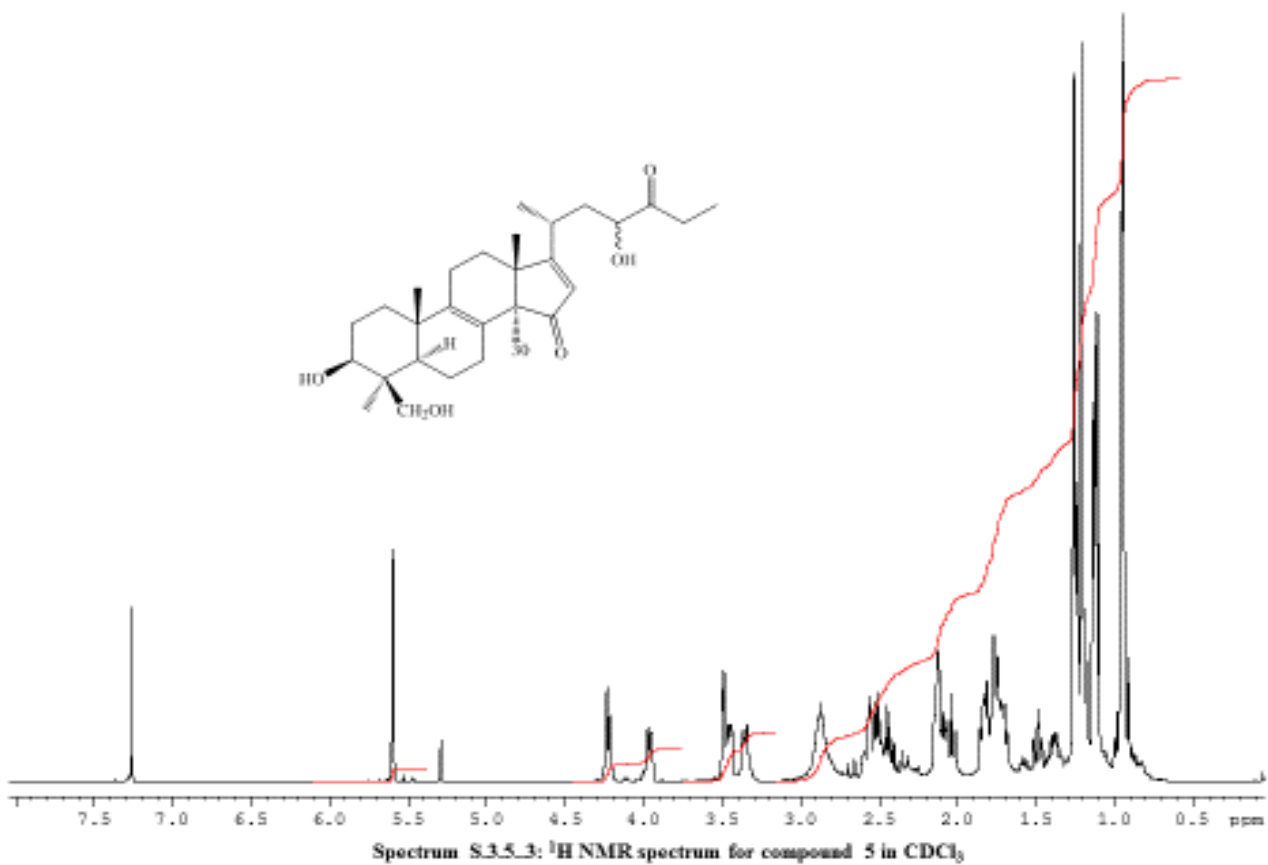

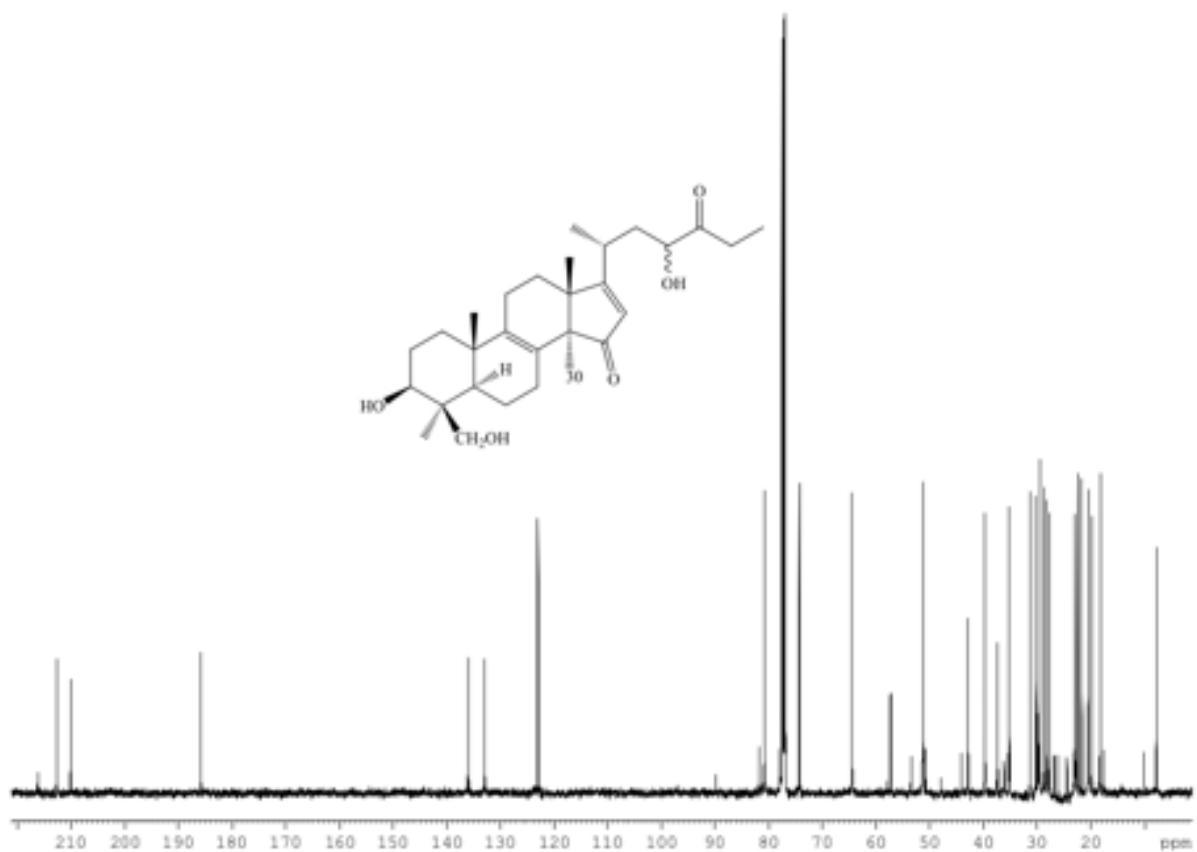

Spectrum S.3.5.4: <sup>13</sup>C NMR spectrum for compound 5 in CDCl<sub>3</sub>

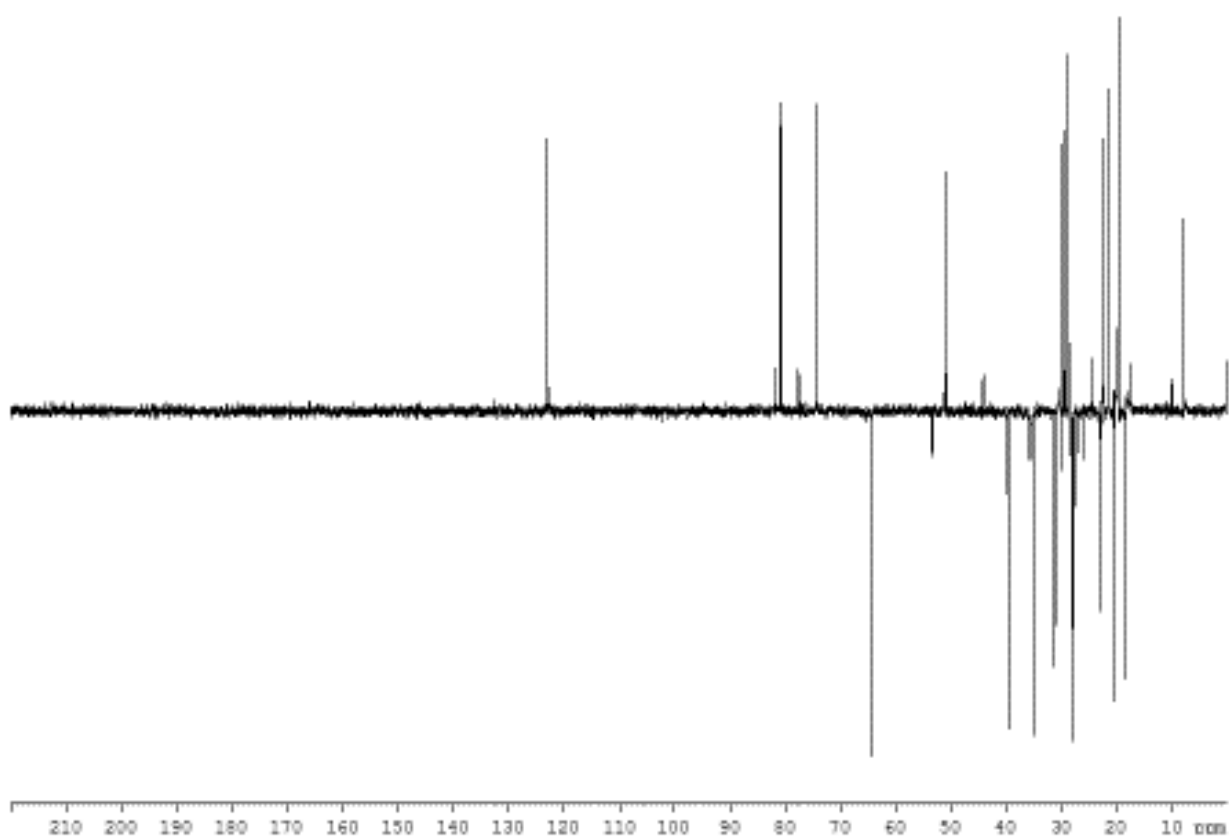

Spectrum S.3.5.5: DEPT spectrum for compound 5 in CDCl<sub>3</sub>



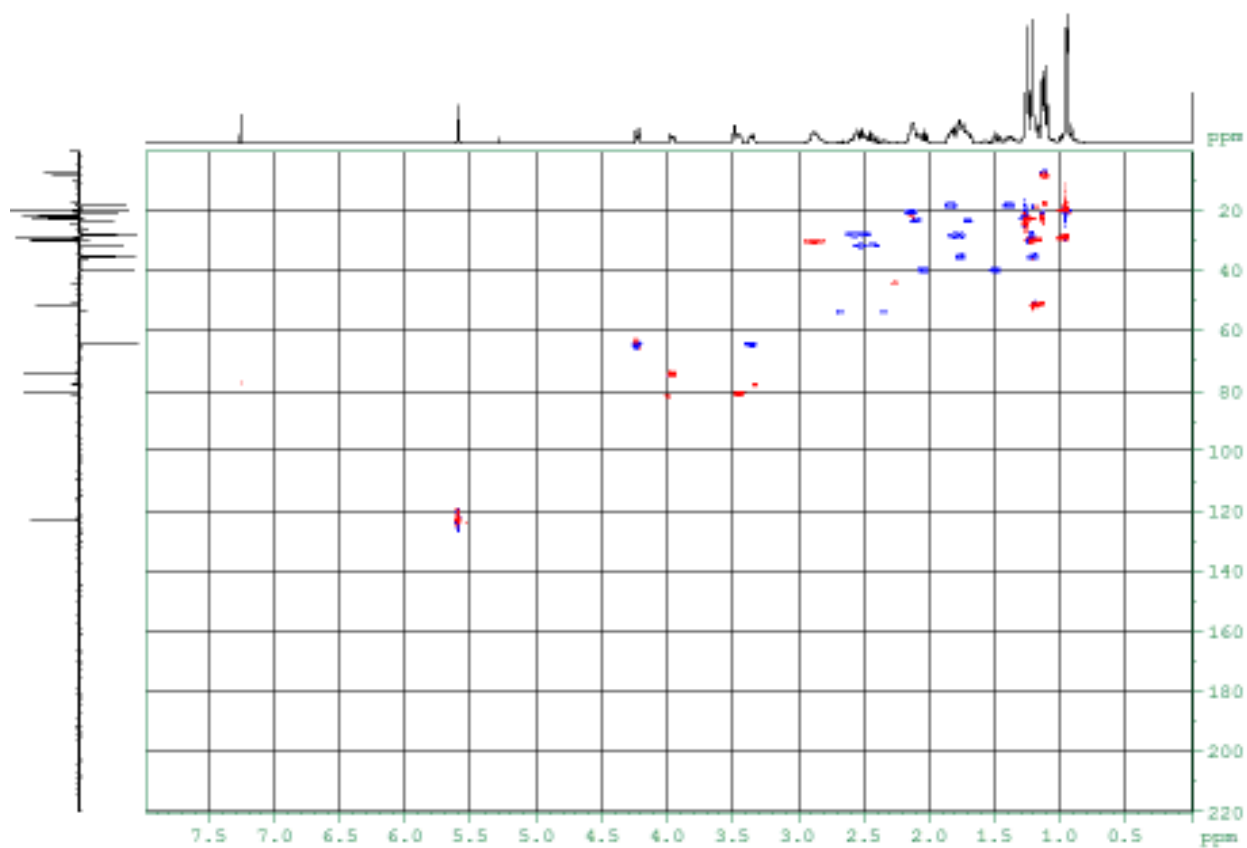

Spectrum S.3.5.6: HSQCDEPT spectrum for compound 5 in CDCl<sub>3</sub>

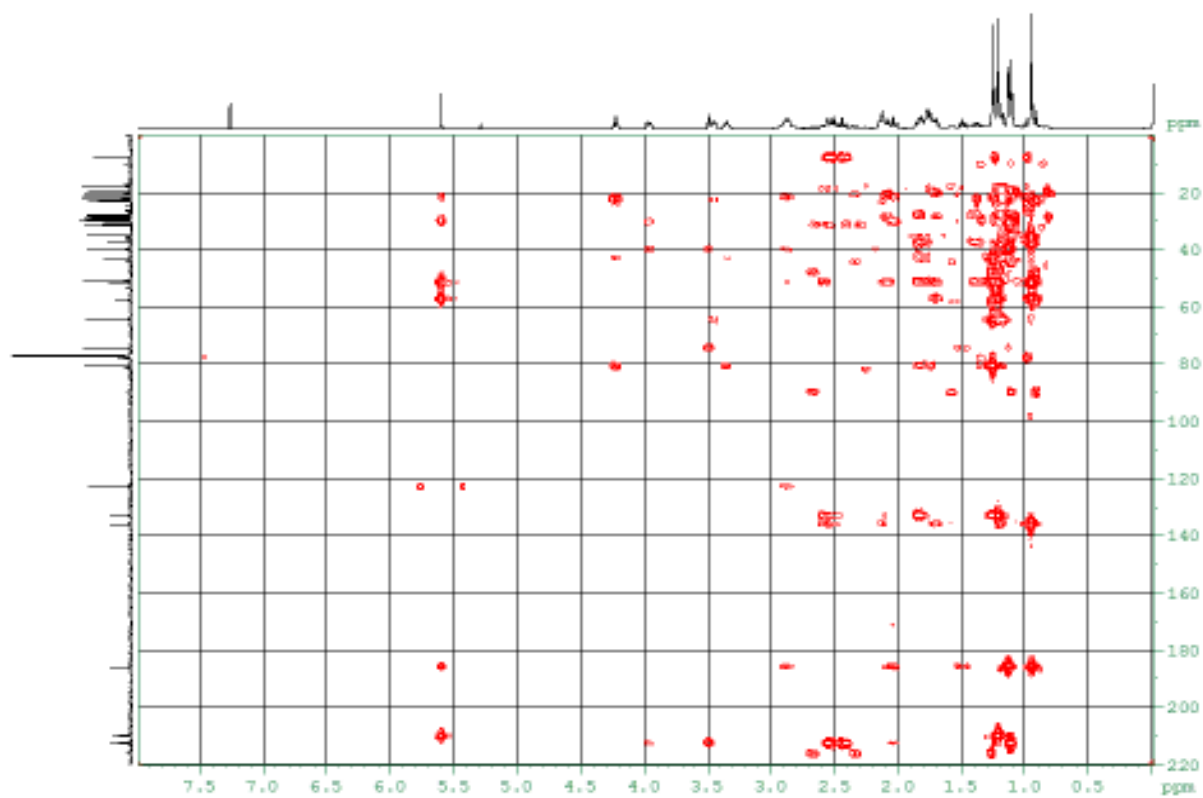

Spectrum S.3.5.7: HMBC spectrum for compound 5 in CDCl<sub>3</sub>

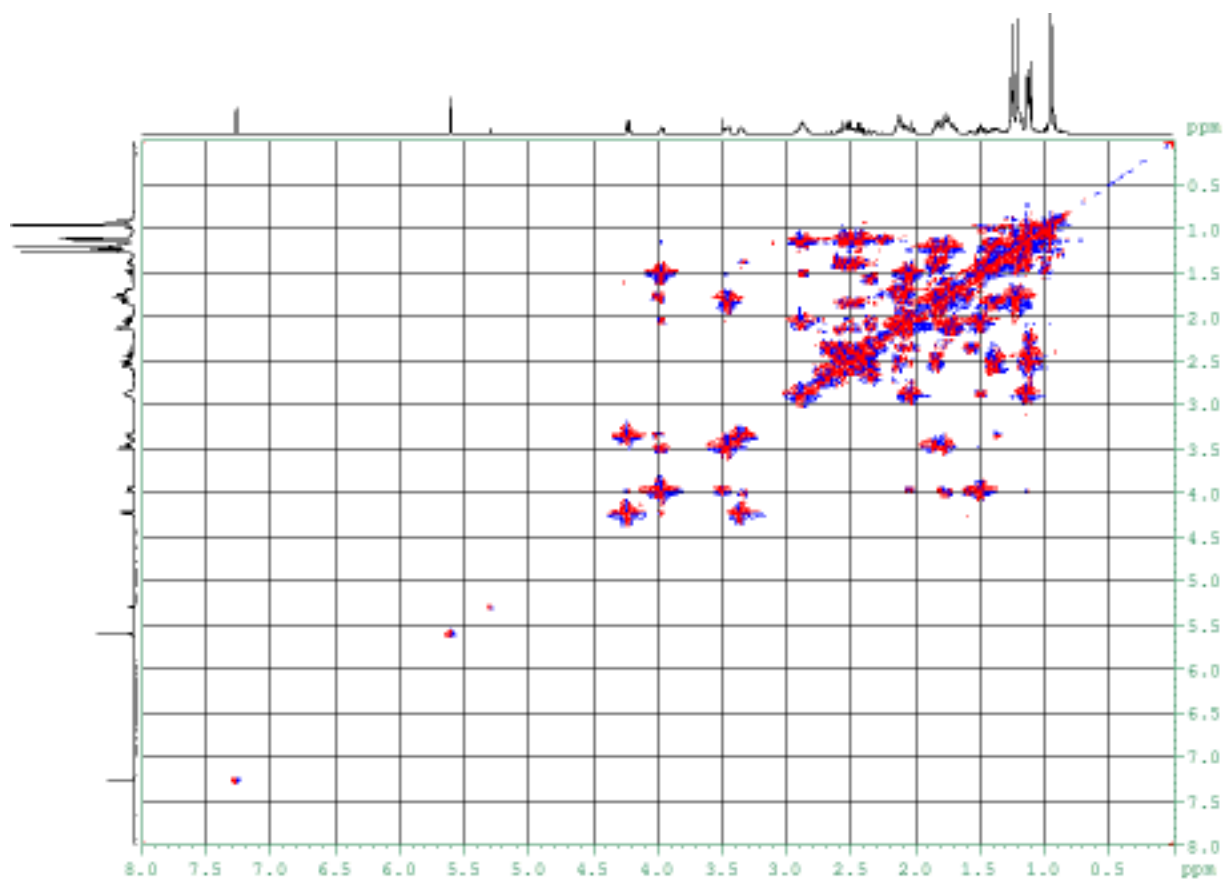

Spectrum S.3.5.8: COSY spectrum for compound 5 in CDCl<sub>3</sub>

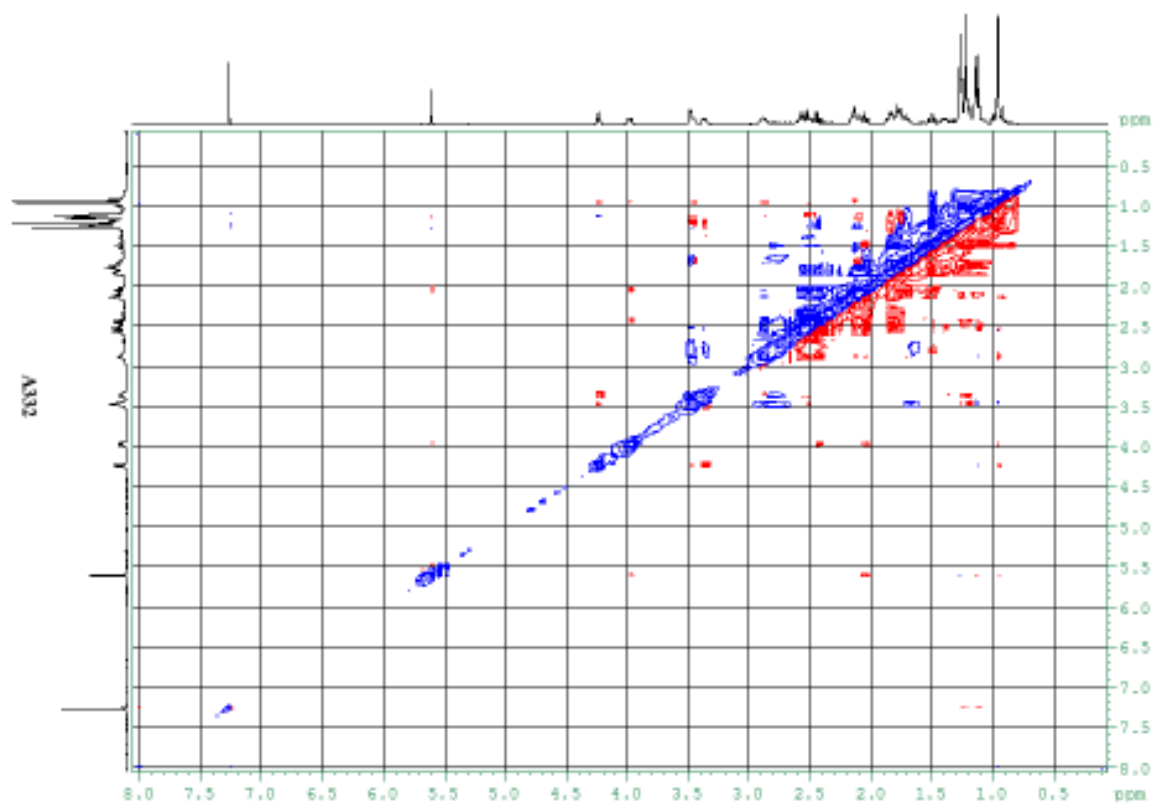

Spectrum S.3.5.9: NOESY spectrum for compound 5 in CDCl<sub>3</sub>

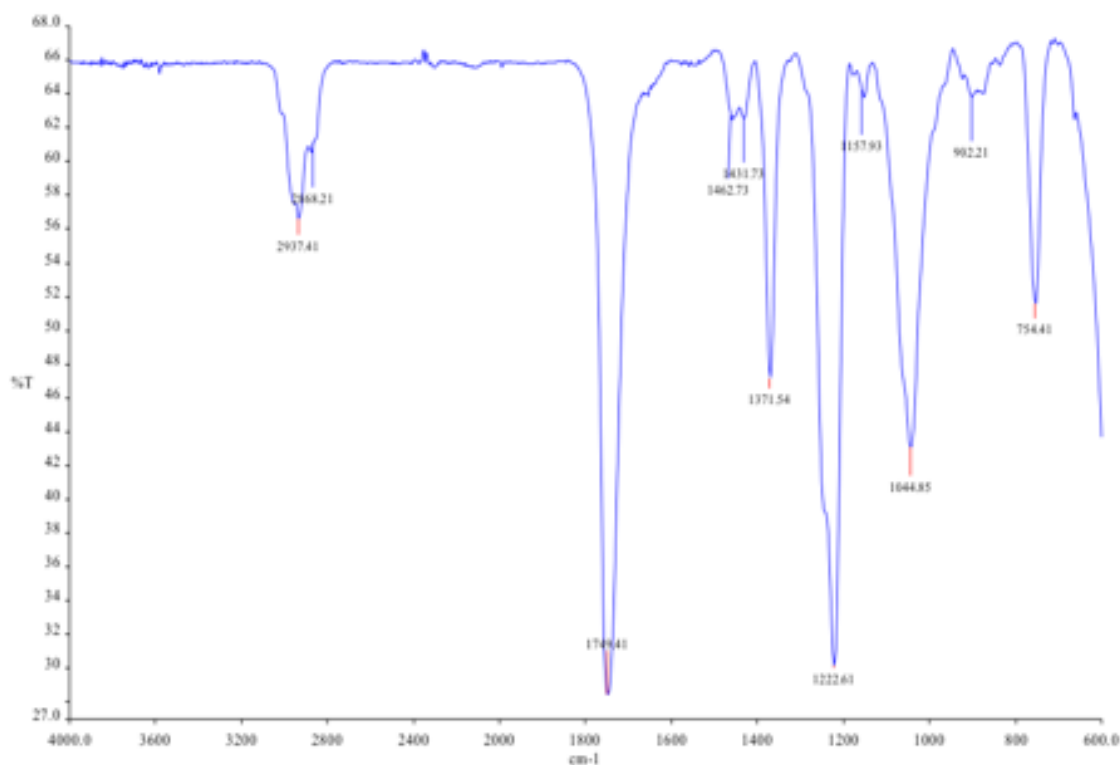

Spectrum S3.6.2: FTIR spectrum for compound 6Ac

### Mass Spectrum SmartFormula Report

Analysis Info  
 Analysis Name Z:\Sep 11\MSS09701\_17\_01\_32459.d Acquisition Date 06/06/2011 10:51 am  
 Method 2.5min\_cal\_sample\_pos\_Nat\_11-10-10.m Operator Mass Spec  
 Sample Name MSS09701 Instrument / Seat microTOF 92  
 Comment

Acquisition Parameter  
 Source Type ESI Ion Polarity Positive Set Nebulizer 2.0 Bar  
 Focus Not active Set Dry Heater 180 °C  
 Scan Begin 100 m/z Set Capillary 4500 V Set Dry Gas 10.0 Flow  
 Scan End 1500 m/z Set End Plate Offset -500 V Set Divert Valve Source

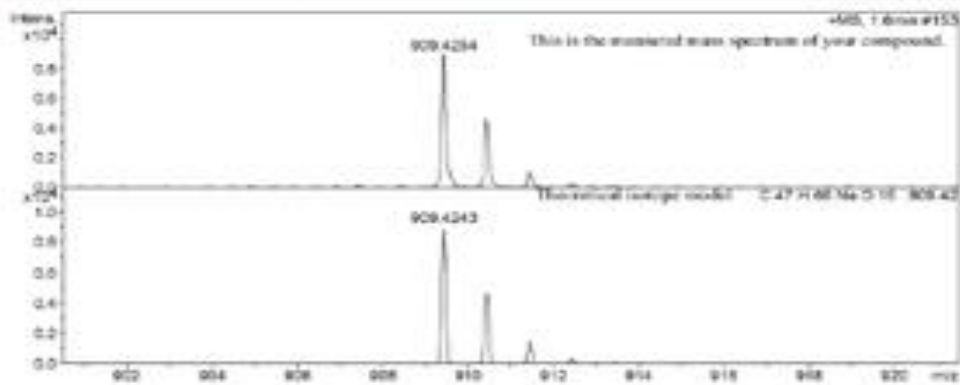

| Mass, m/z | # | Formula           | mb       | err [ppm] | Mean err [ppm] | ndb  | e <sup>-</sup> Conf | mSigma |
|-----------|---|-------------------|----------|-----------|----------------|------|---------------------|--------|
| 909.4256  | 1 | C 47 H 96 Na O 16 | 909.4243 | -1.2      | -0.9           | 14.5 | over                | 19.24  |

Spectrum S3.6.1: Mass spectrum for compound 6Ac

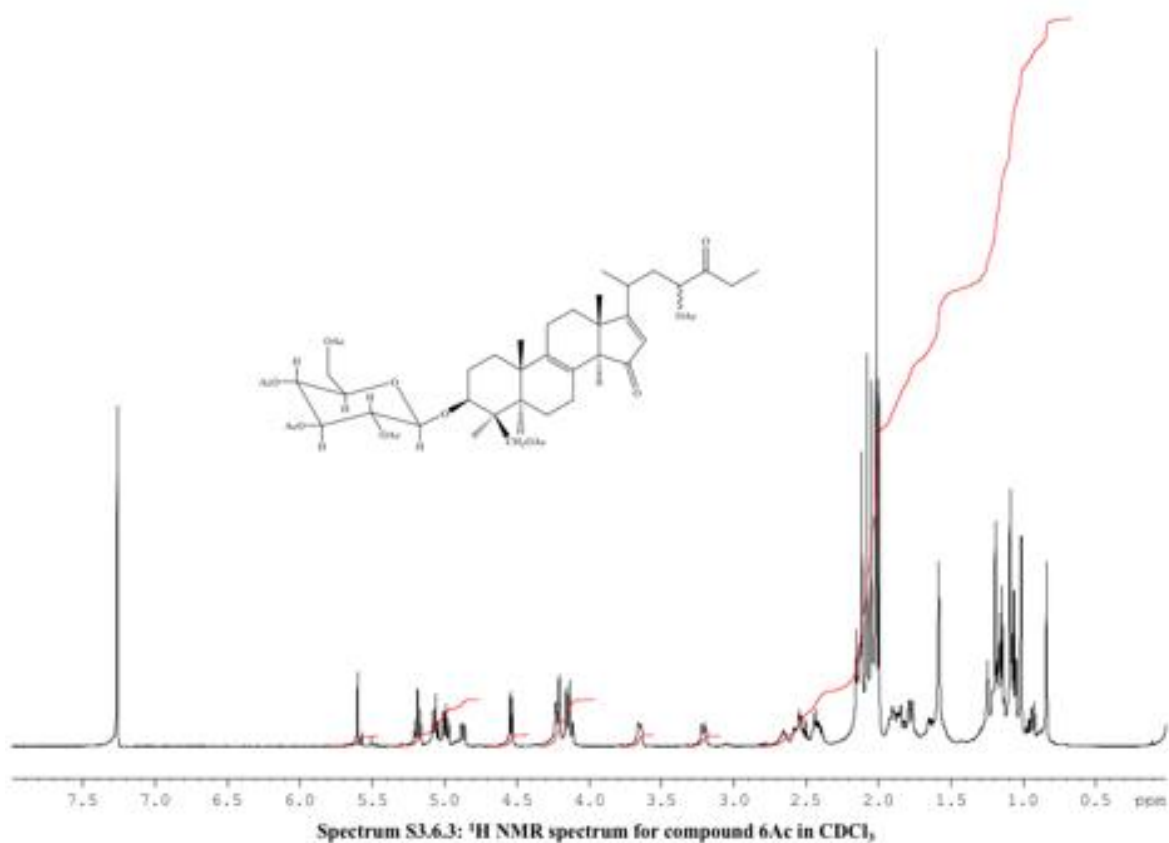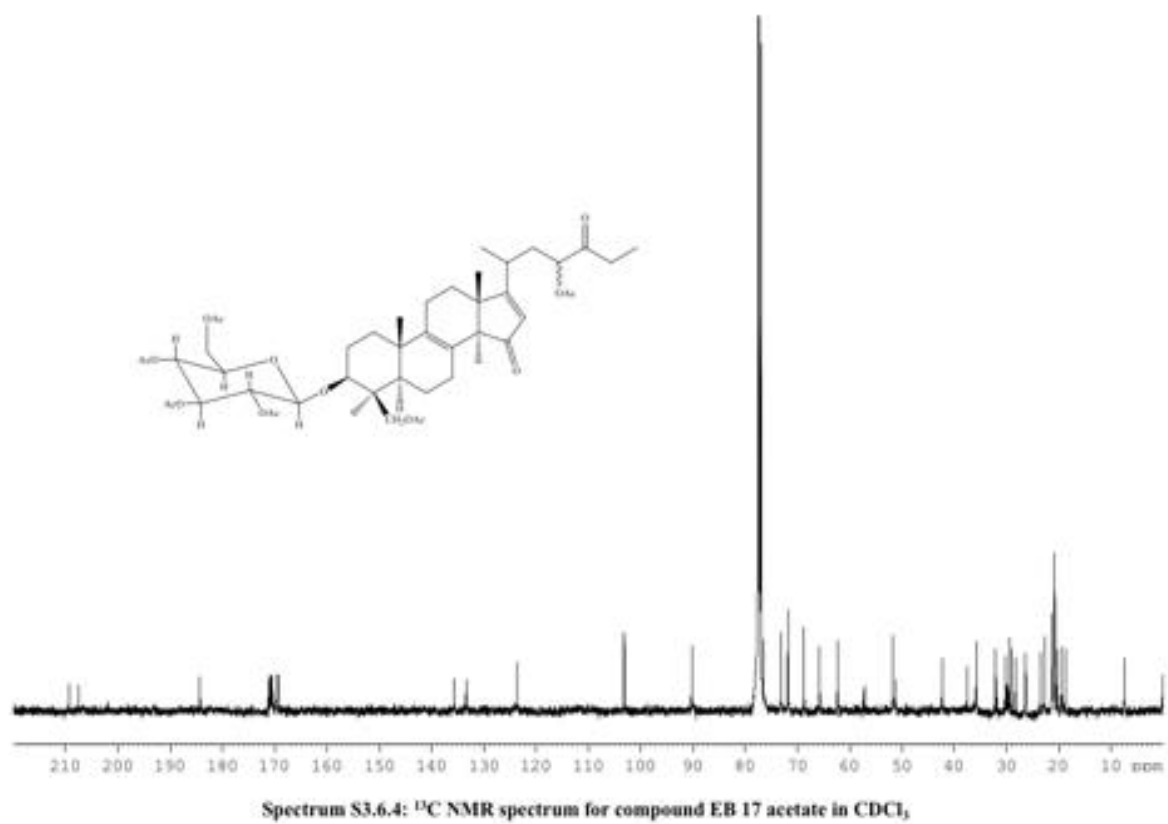

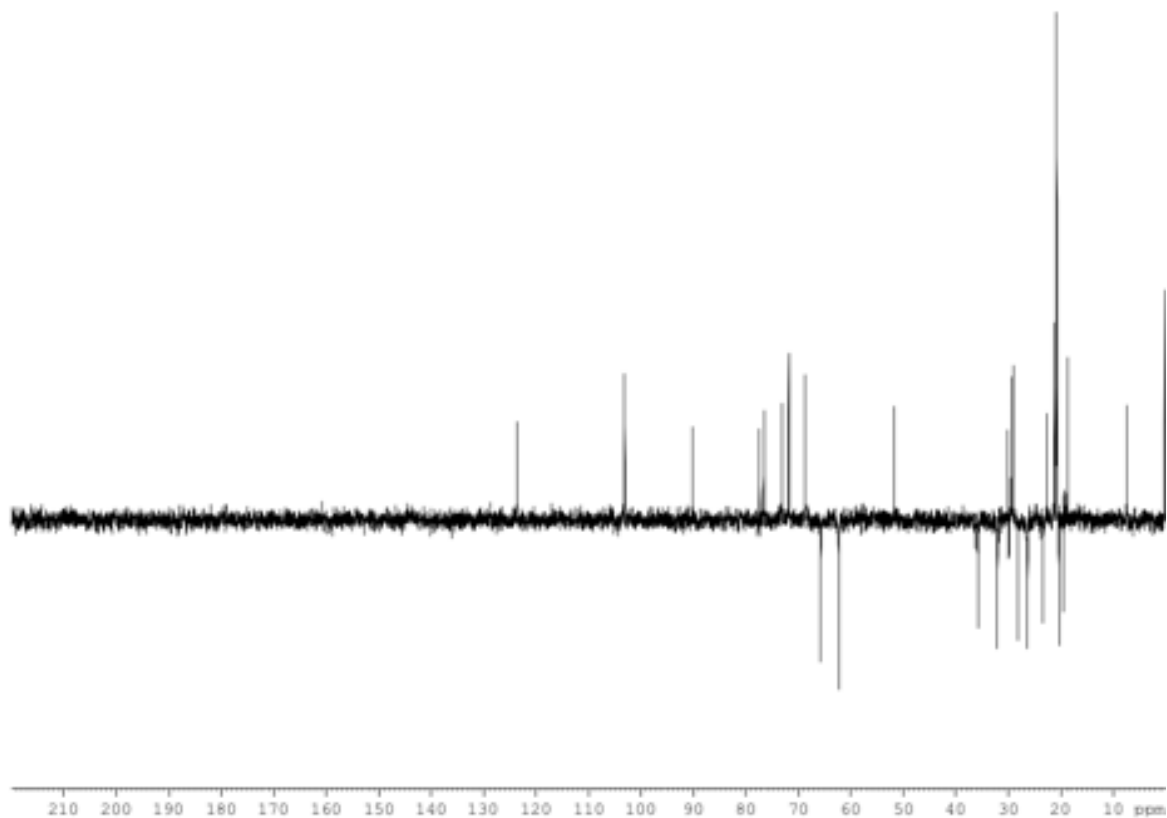

Spectrum S3.6.5: DEPT spectrum for compound 6Ac in  $\text{CDCl}_3$

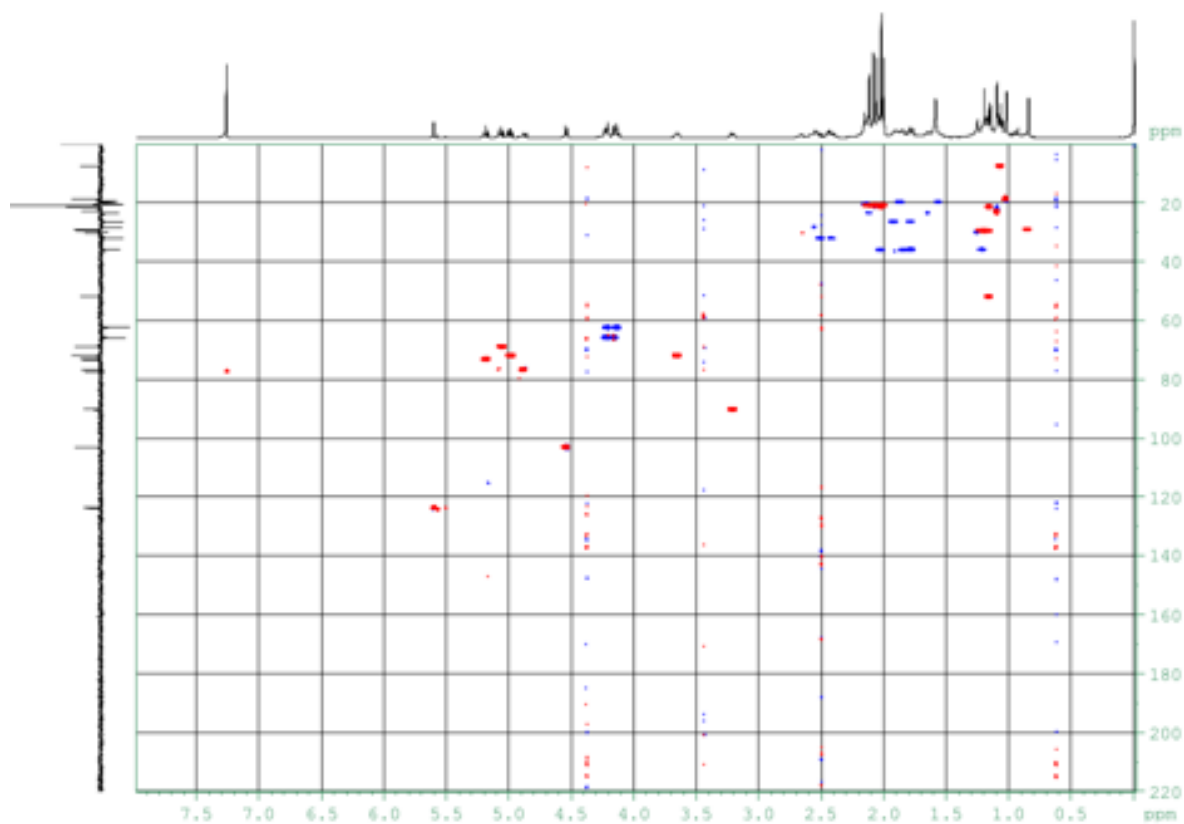

Spectrum S3.6.6: HSQCDEPT spectrum for compound 6Ac in  $\text{CDCl}_3$

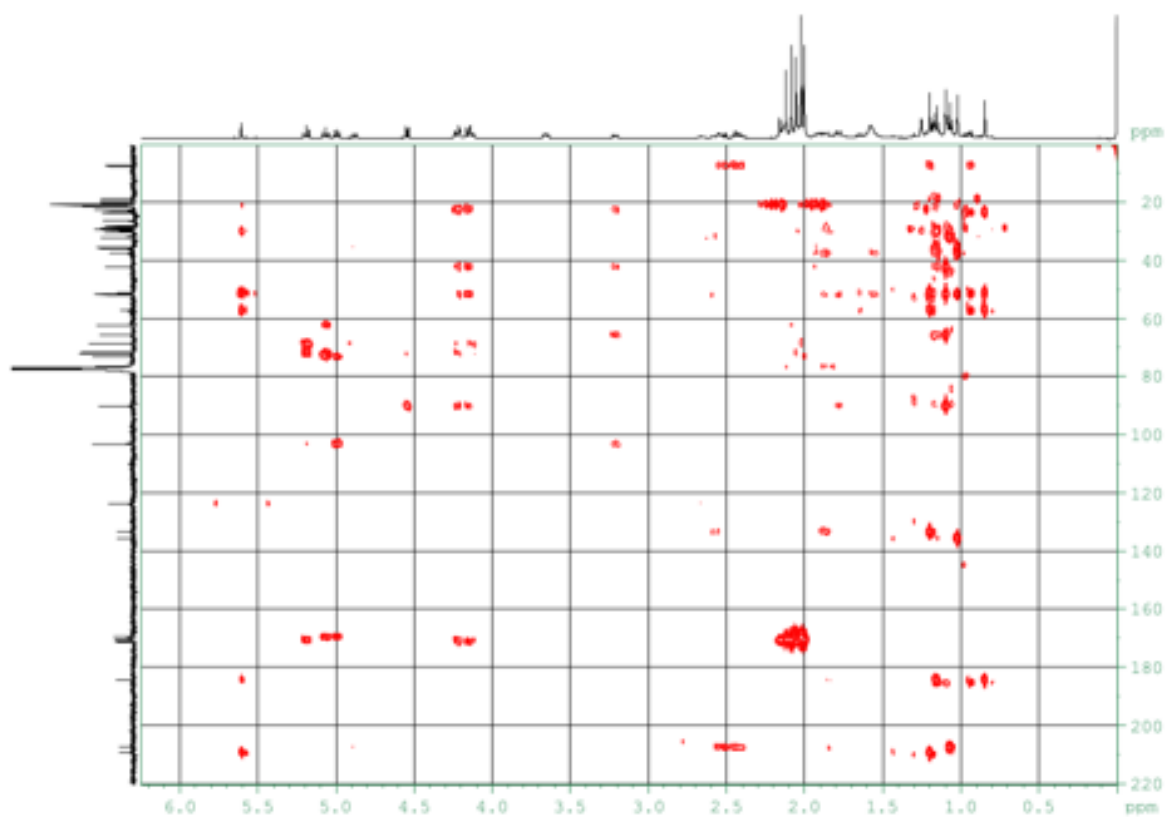

Spectrum S3.6.7: HMBC spectrum for compound 6Ac in CDCl<sub>3</sub>.

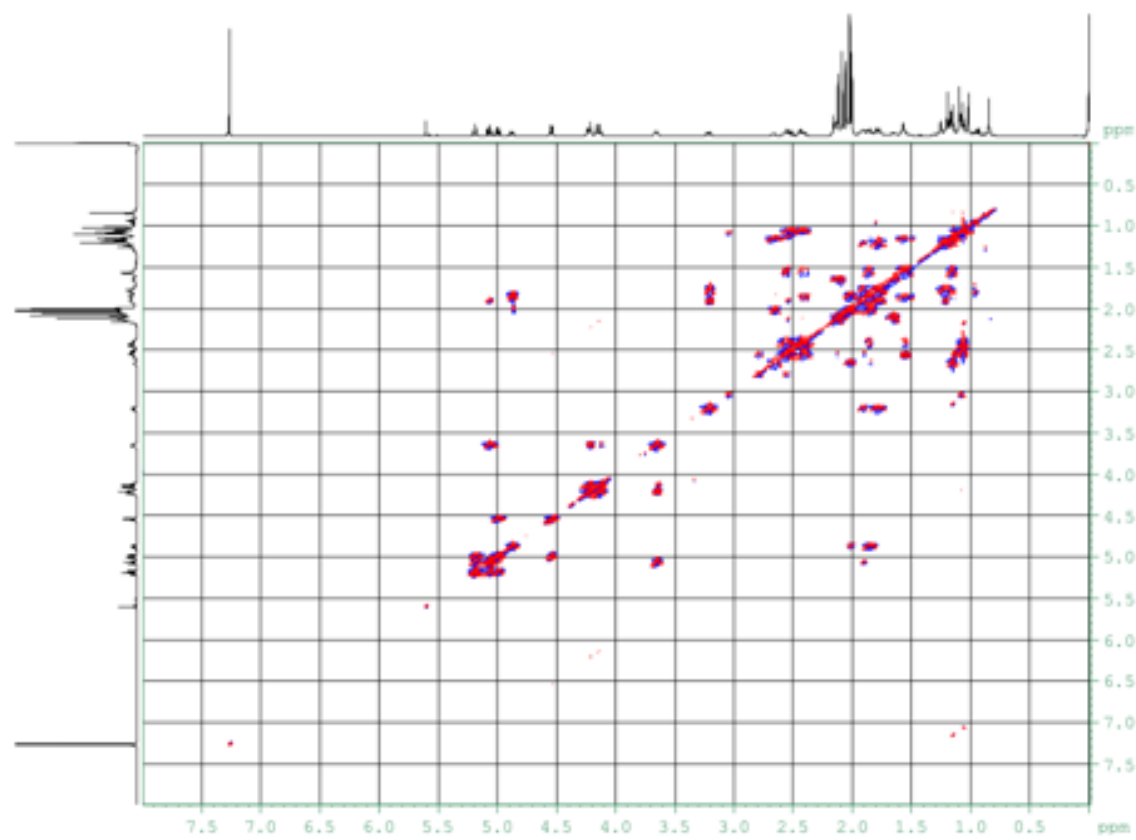

Spectrum S3.6.8: COSY spectrum for compound 6Ac in CDCl<sub>3</sub>.

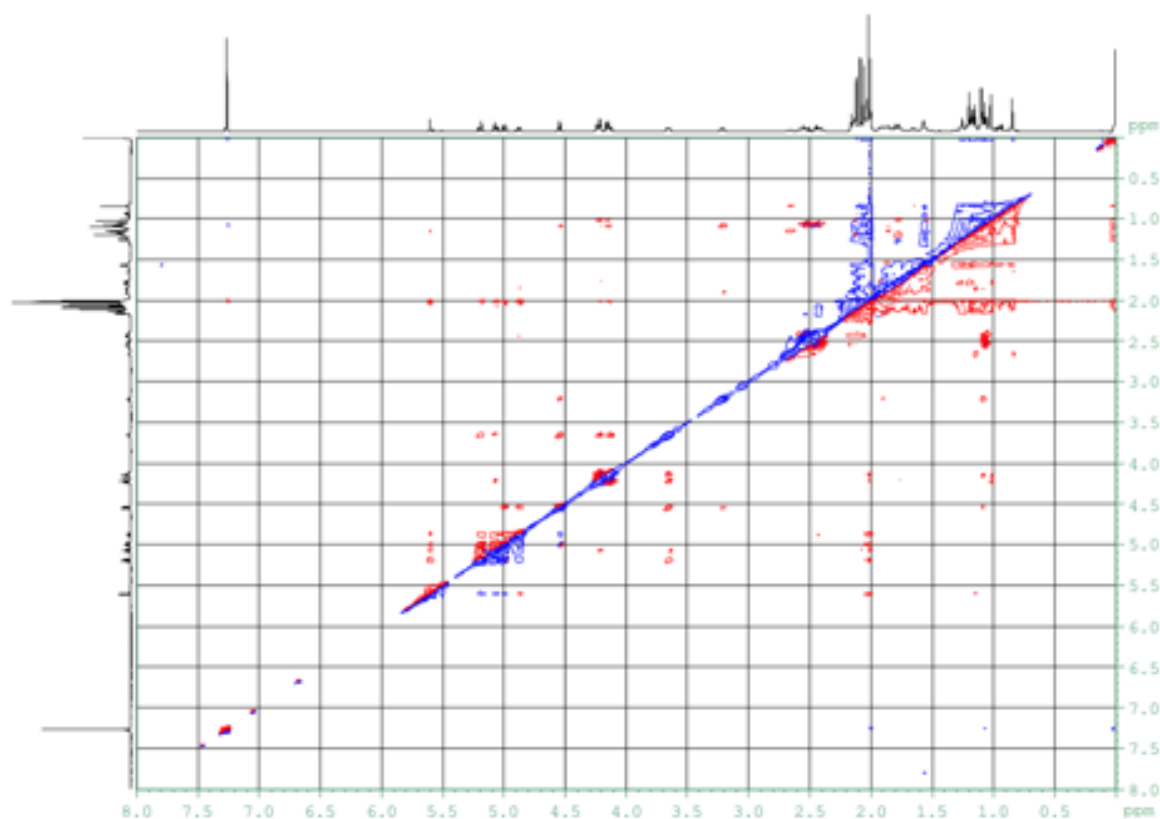

Spectrum S3.6.9: NOESY spectrum for compound 6Ac in CDCl<sub>3</sub>

### Mass Spectrum SmartFormula Report

#### Analysis Info

Analysis Name: \\lto\data\jun 12\MSS 10981b\_04\_01\_44082.d  
 Method: 2.5min\_cal\_sample\_pos\_Nat\_Mid\_mass.m  
 Sample Name: MSS 10981b  
 Comment:

Acquisition Date: 25/06/2012 17:08:44

Operator: Mass-Spec  
 Instrument / Serial: microTOF 62

#### Acquisition Parameter

|             |            |                      |          |                    |            |
|-------------|------------|----------------------|----------|--------------------|------------|
| Source Type | ESI        | Ion Polarity         | Positive | Set Nebulizer      | 2.0 Bar    |
| Focus       | Not active |                      |          | Set Dry Heater     | 180 °C     |
| Scan Begin  | 100 m/z    | Set Capillary        | 4500 V   | Set Dry Gas        | 10.0 l/min |
| Scan End    | 1856 m/z   | Set End Plate Offset | -500 V   | Set S divert Valve | Source     |

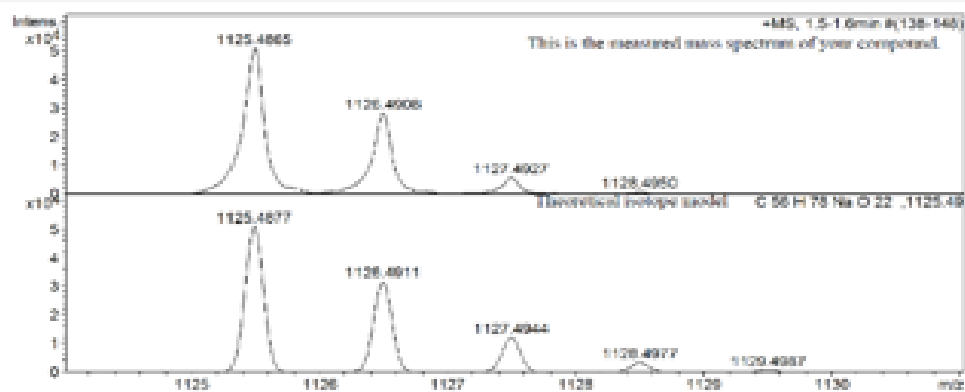

| Meas. m/z | # | Formula           | m/z       | err (ppm) | Mean err (ppm) | relb | e <sup>-</sup> | Conf | mSigma |
|-----------|---|-------------------|-----------|-----------|----------------|------|----------------|------|--------|
| 1125.4865 | 1 | C 56 H 78 Na O 22 | 1125.4877 | 1.0       | 0.8            | 17.5 | even           |      | 67.14  |

Spectrum S3.7.1: Mass spectrum for compound 7Ac

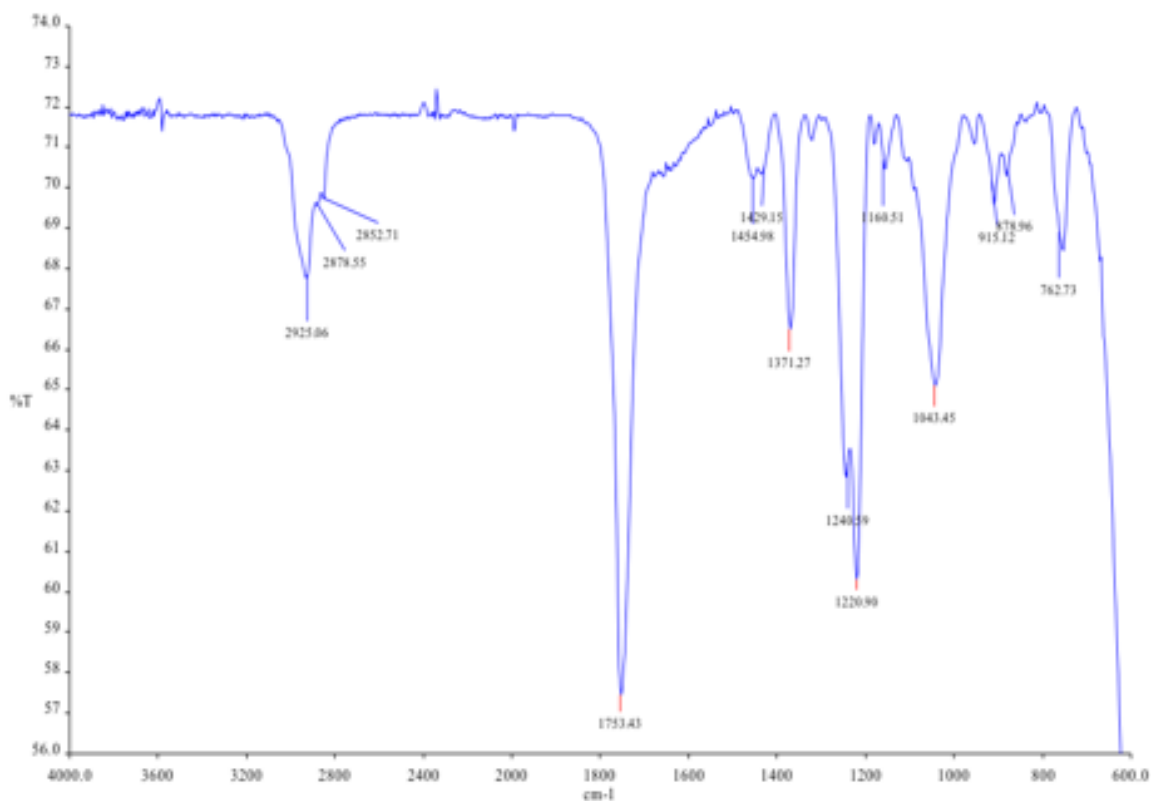

Spectrum S.3.7.2: FTIR spectrum for compound 7Ac

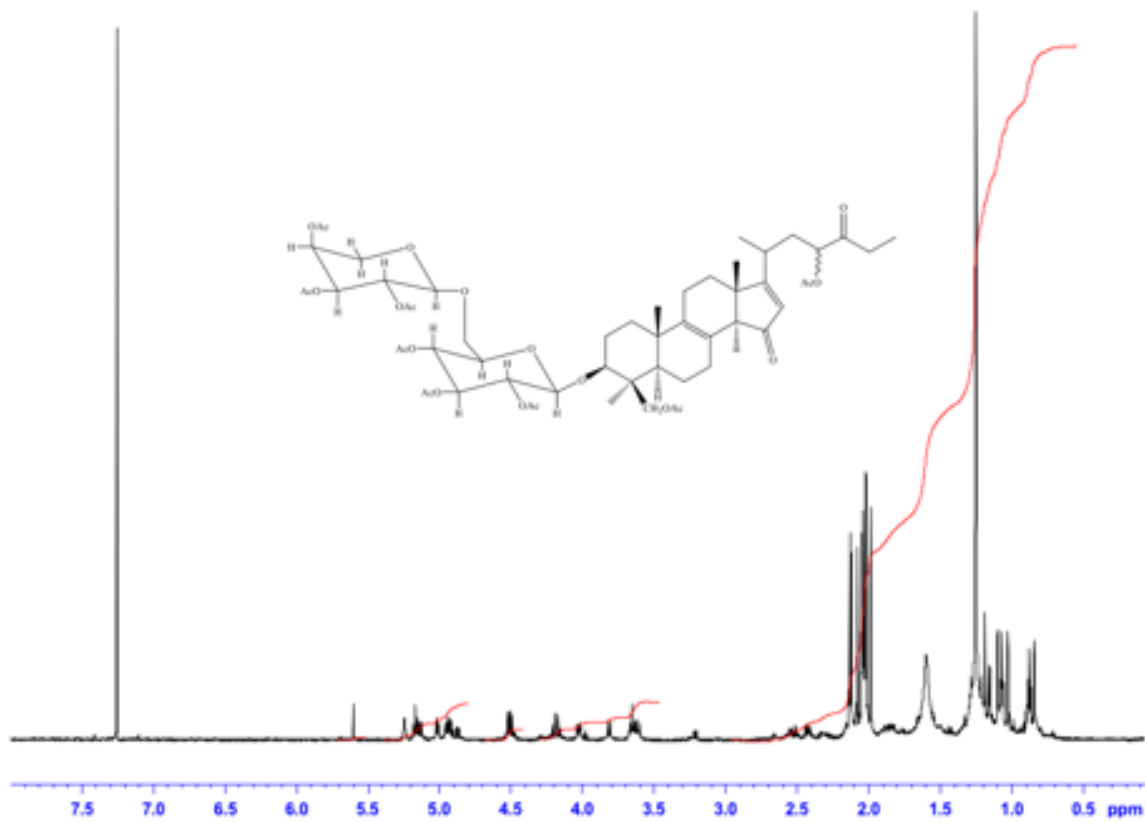

Spectrum S.3.7.3: <sup>1</sup>H NMR spectrum for compound 7Ac in CDCl<sub>3</sub>



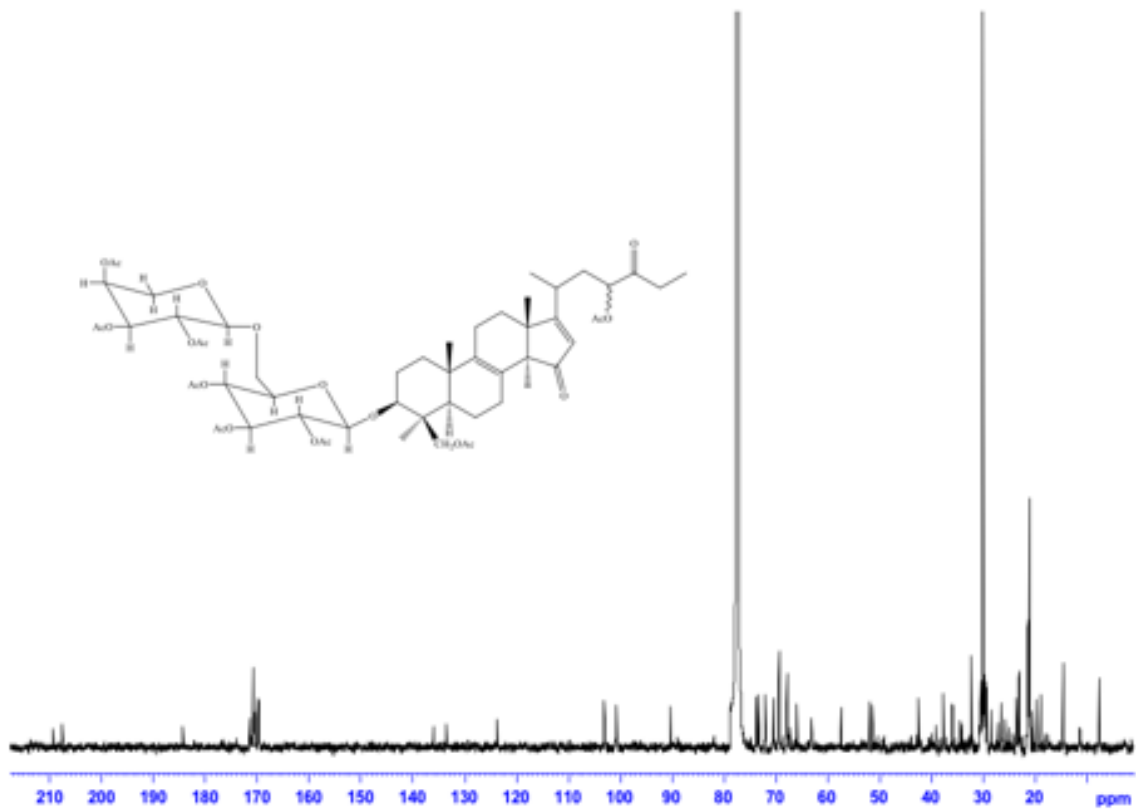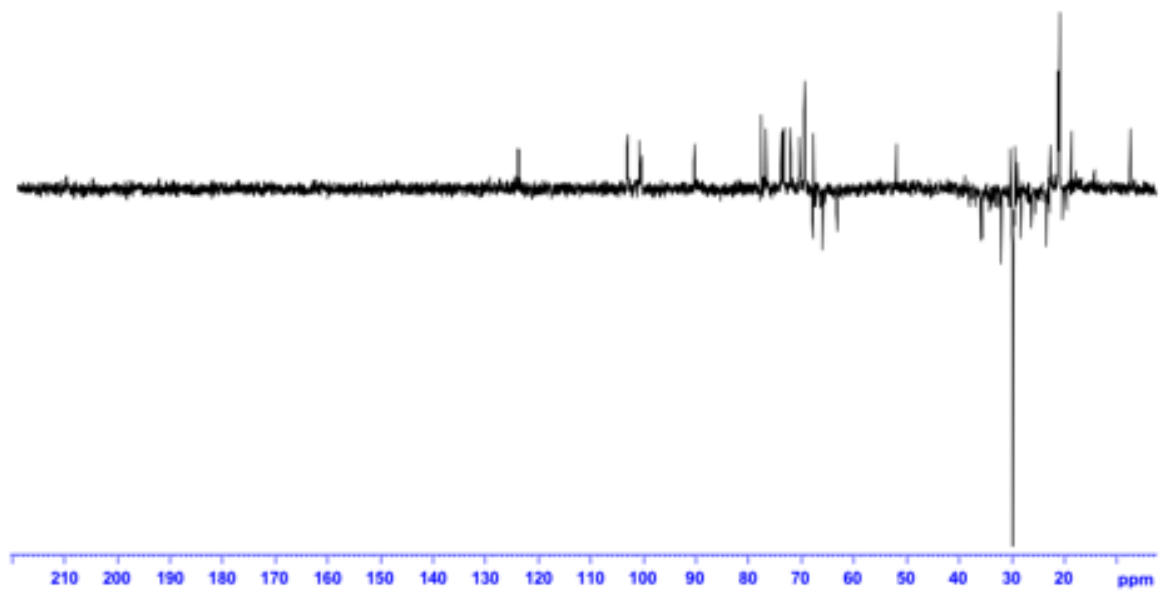

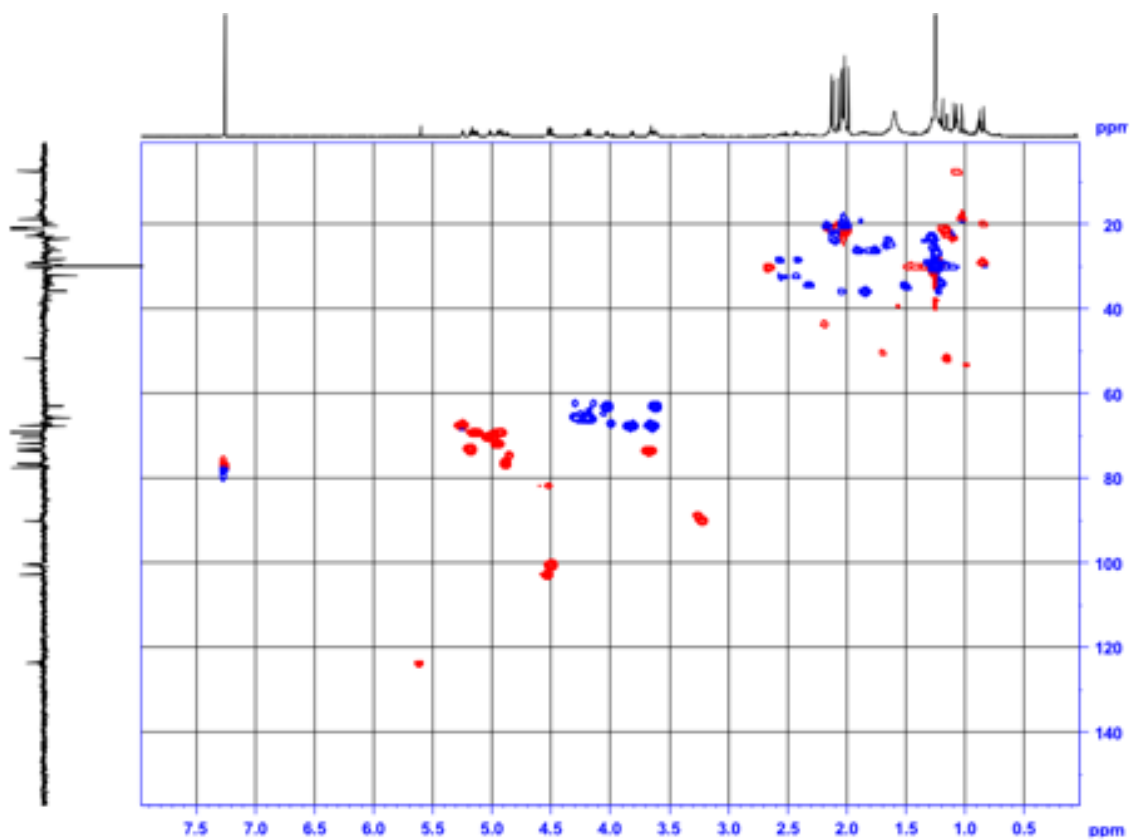

Spectrum S.3.7.6: HSQCDEPT spectrum for compound 7Ac in CDCl<sub>3</sub>

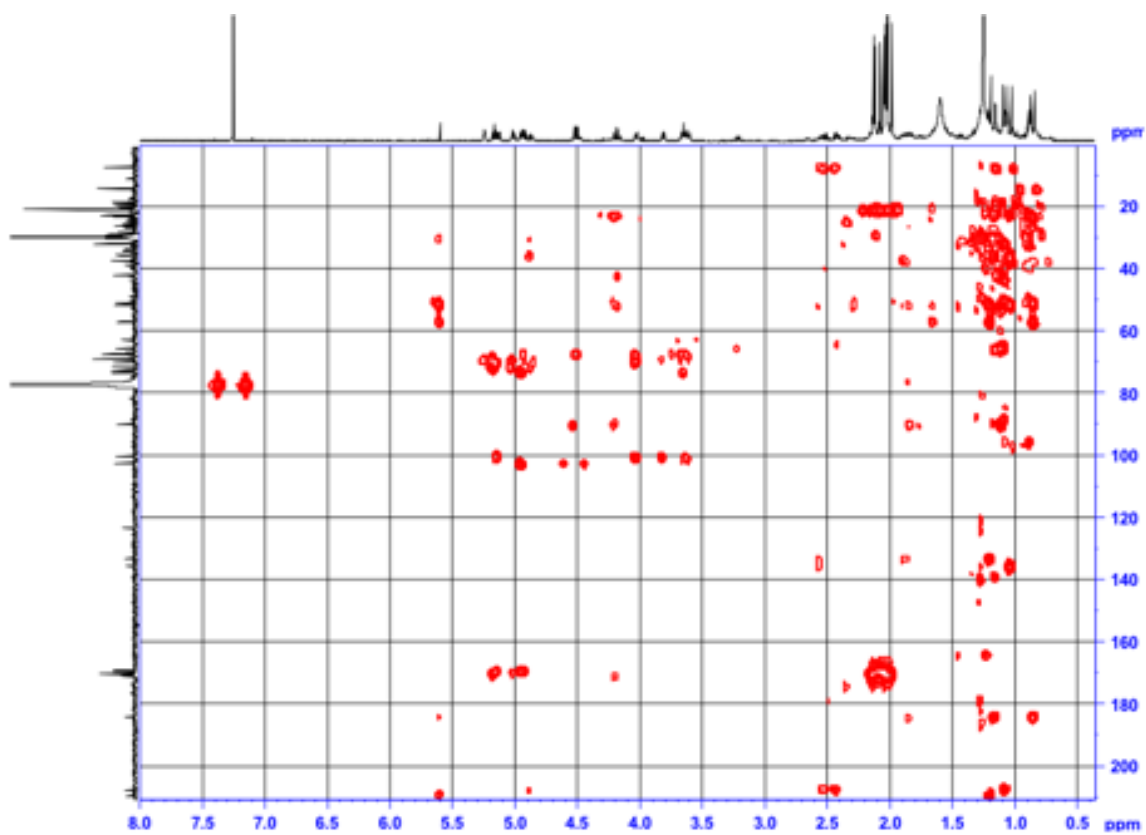

Spectrum S.3.7.7: HMBC spectrum for compound 7Ac in CDCl<sub>3</sub>

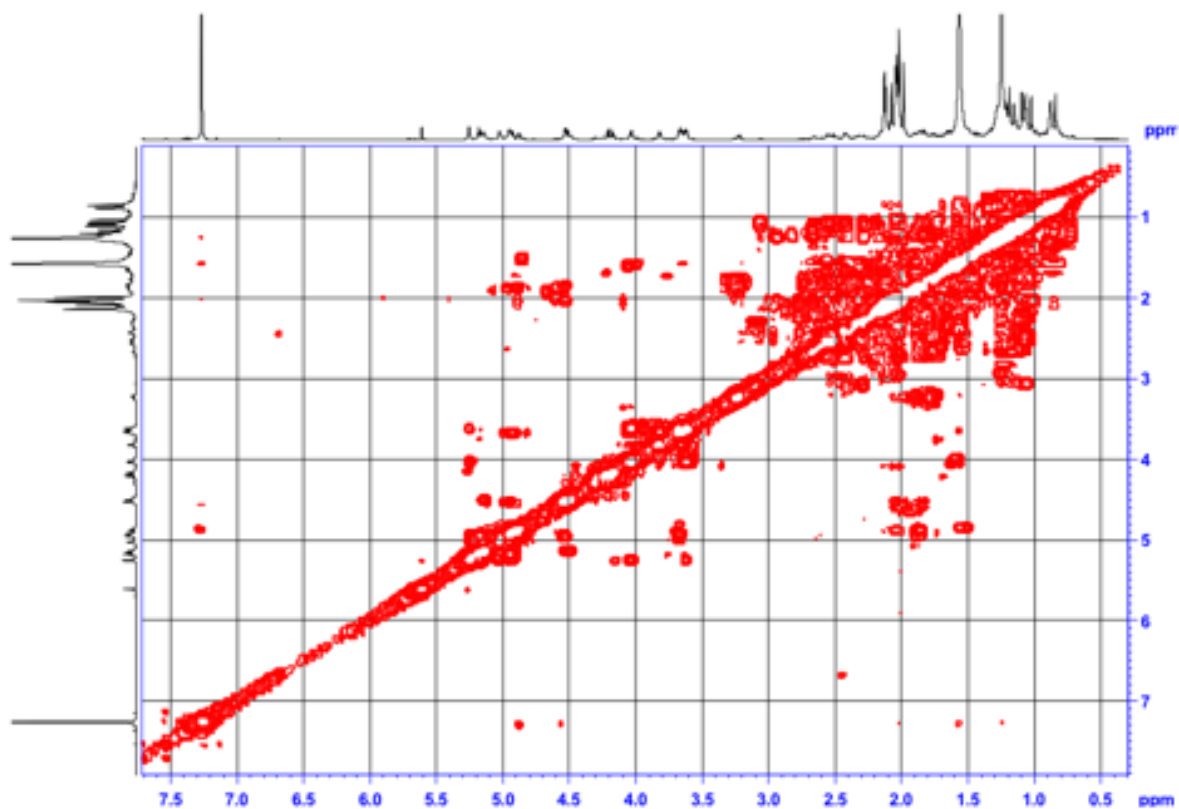

Spectrum S.3.7.8: COSY spectrum for compound 7Ac in CDCl<sub>3</sub>

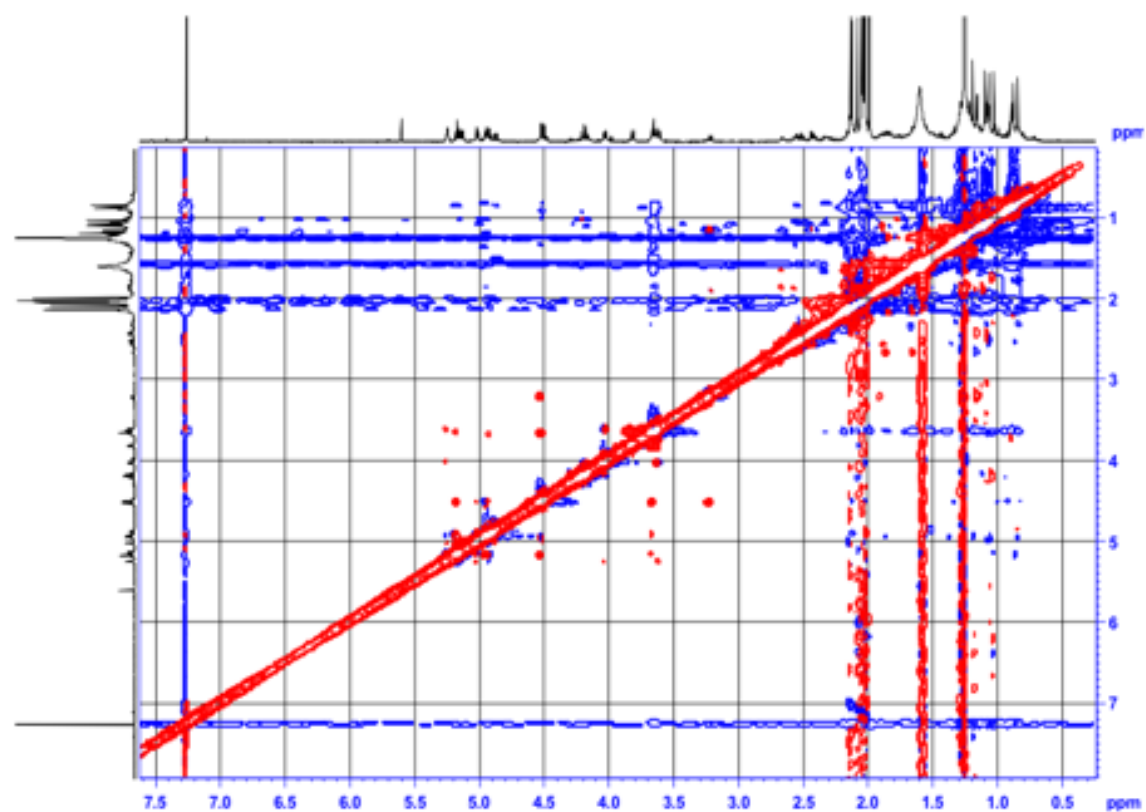

Spectrum S.3.7.9: NOESY spectrum for compound 7Ac in CDCl<sub>3</sub>

## Mass Spectrum SmartFormula Report

### Analysis Info

Analysis Name: IltOfDataRun 12MSS 10984b\_86\_01\_44064.d  
 Method: 2.5min\_cal\_sample\_pos\_Naf\_11-10-10.m  
 Sample Name: MSS 10984b  
 Comment:

Acquisition Date: 25/06/2012 17:15:42

Operator: Mass Spec  
 Instrument / Ser#: microTOF 92

### Acquisition Parameter

|             |            |                      |          |                  |            |
|-------------|------------|----------------------|----------|------------------|------------|
| Source Type | ESI        | Ion Polarity         | Positive | Set Nebulzer     | 2.0 Bar    |
| Focus       | Not active |                      |          | Set Dry Heater   | 181 °C     |
| Scan Begin  | 100 m/z    | Set Capillary        | 4500 V   | Set Dry Gas      | 10.0 l/min |
| Scan End    | 1000 m/z   | Set End Plate Offset | -500 V   | Set Divert Valve | Source     |

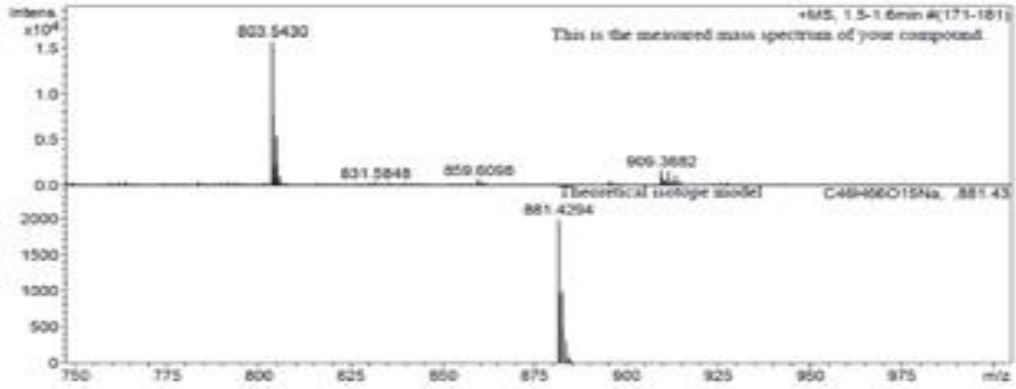

| Meas. m/z | # | Formula | m/z | err [ppm] | Mean err [ppm] | rtb | e <sup>-</sup> | Conf | mSigma |
|-----------|---|---------|-----|-----------|----------------|-----|----------------|------|--------|
|-----------|---|---------|-----|-----------|----------------|-----|----------------|------|--------|

**Spectrum S3.8.1: Mass spectrum for compound 8Ac**

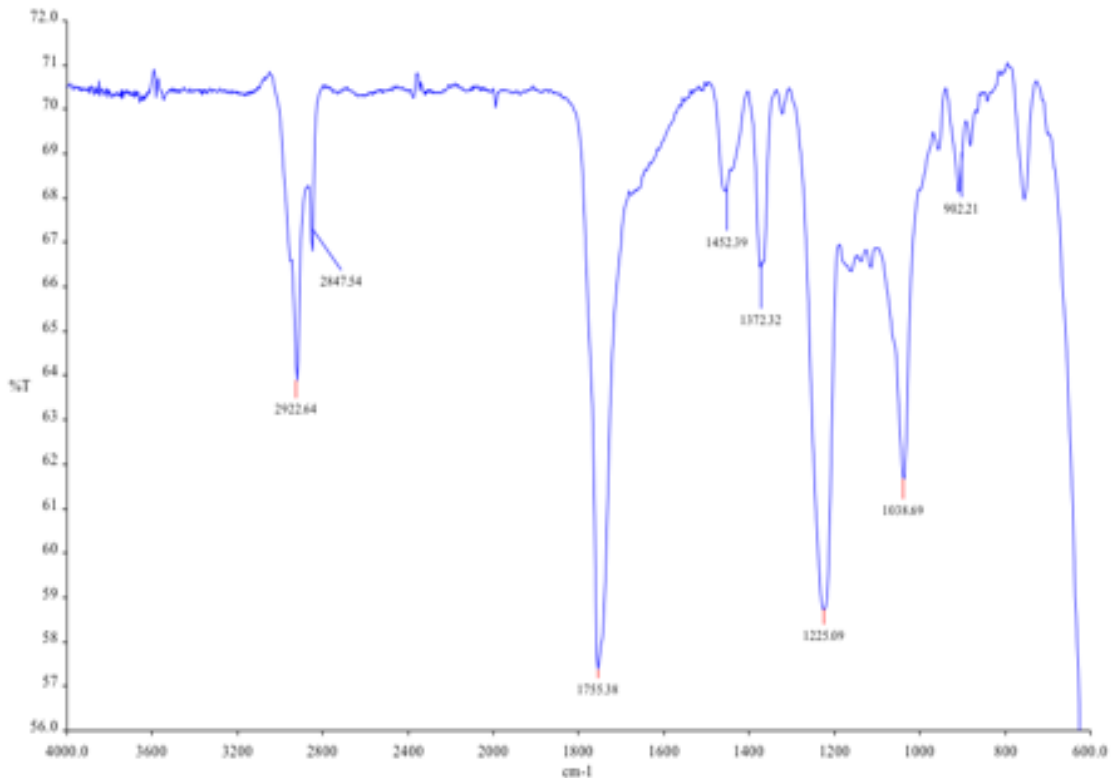

**Spectrum S3.8.2: FTIR spectrum for compound 8A**

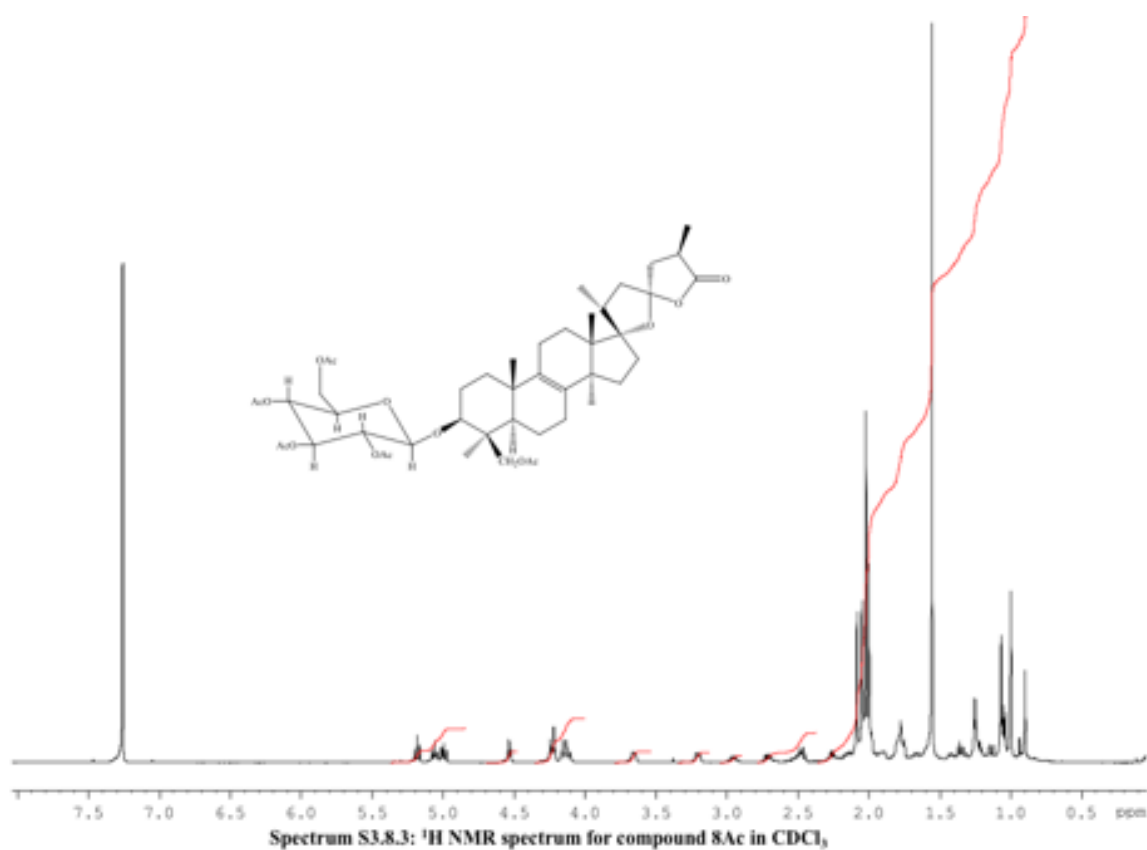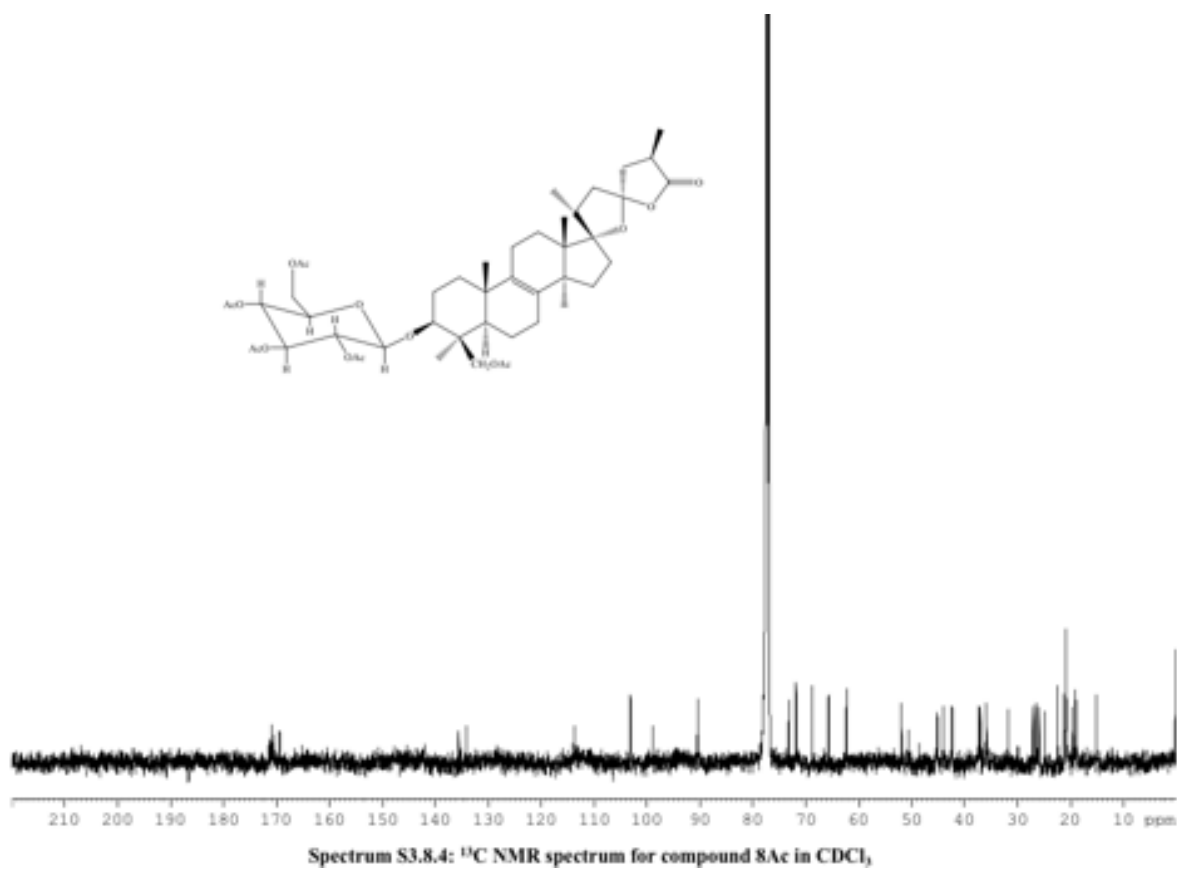

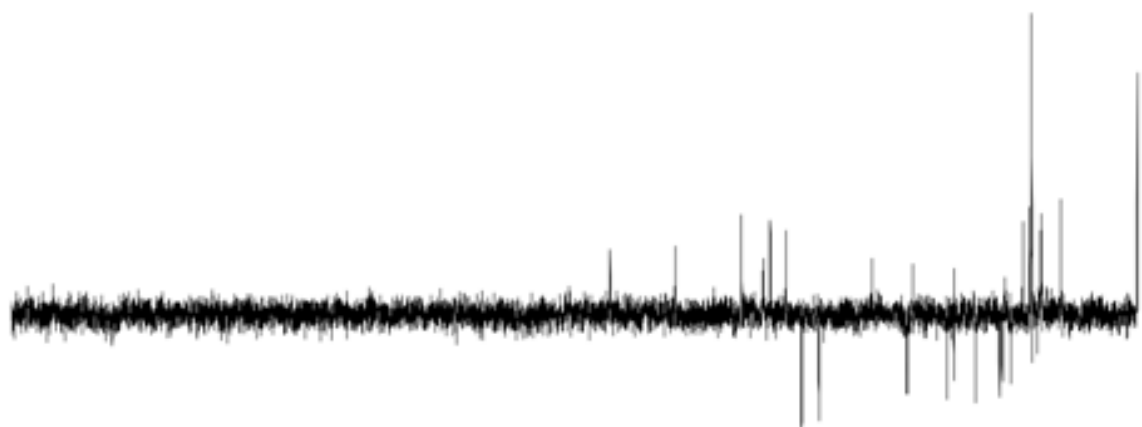

Spectrum S3.8.5: DEPT spectrum for compound 8Ac in  $CDCl_3$

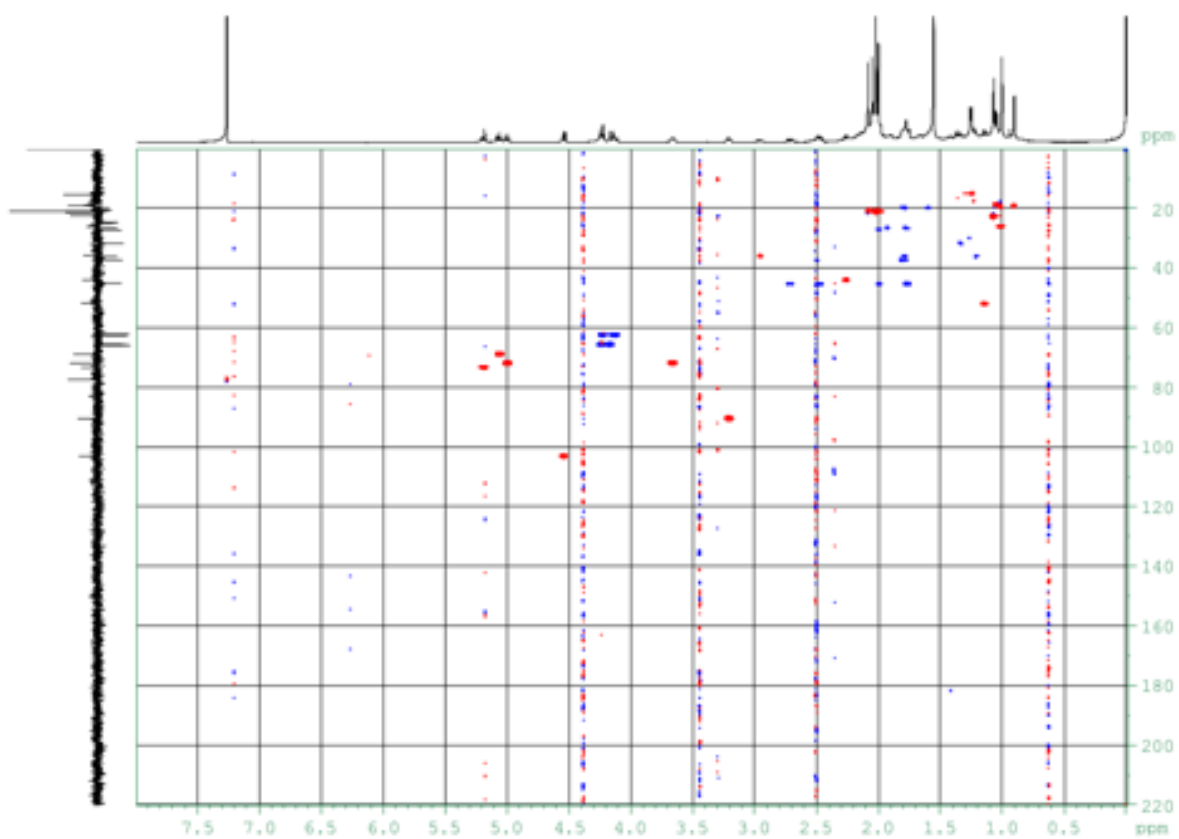

Spectrum S3.8.6: HSQCDEPT spectrum for compound 8Ac in  $CDCl_3$

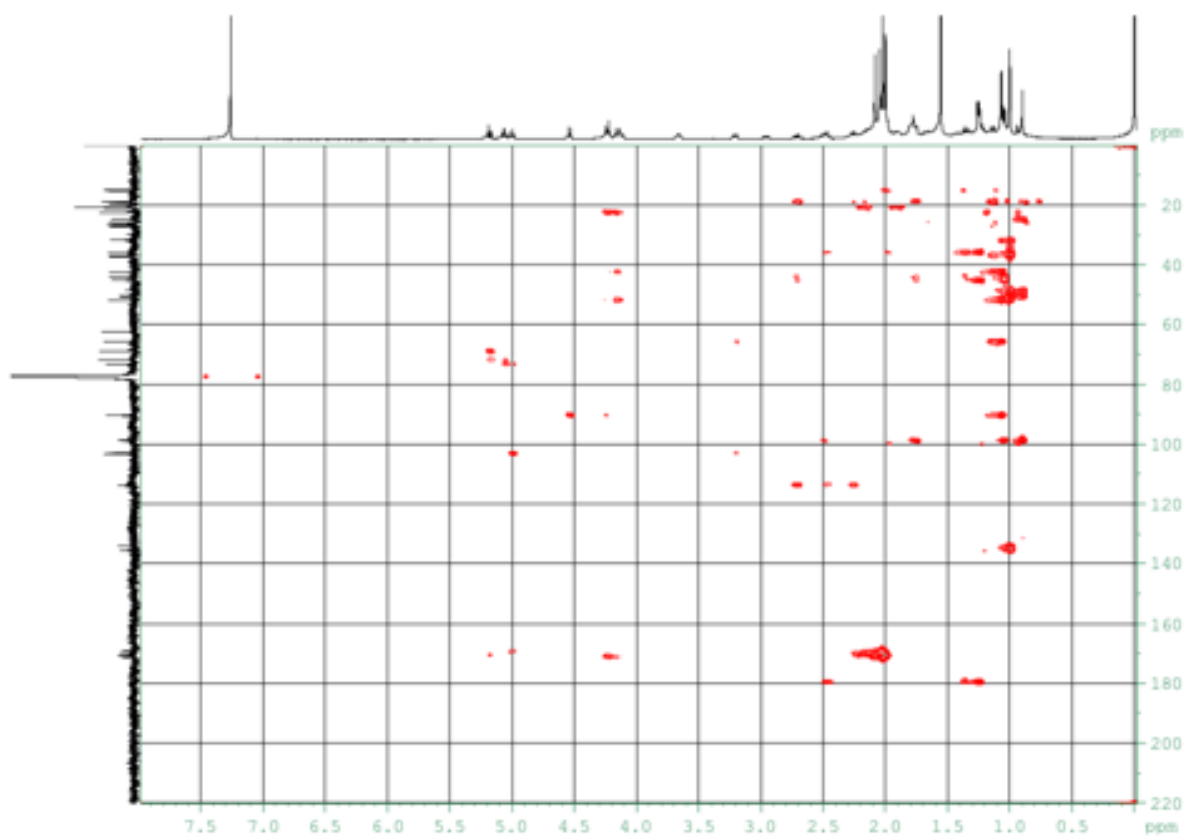

Spectrum S3.8.7: HMBC spectrum for compound 8Ac in CDCl<sub>3</sub>

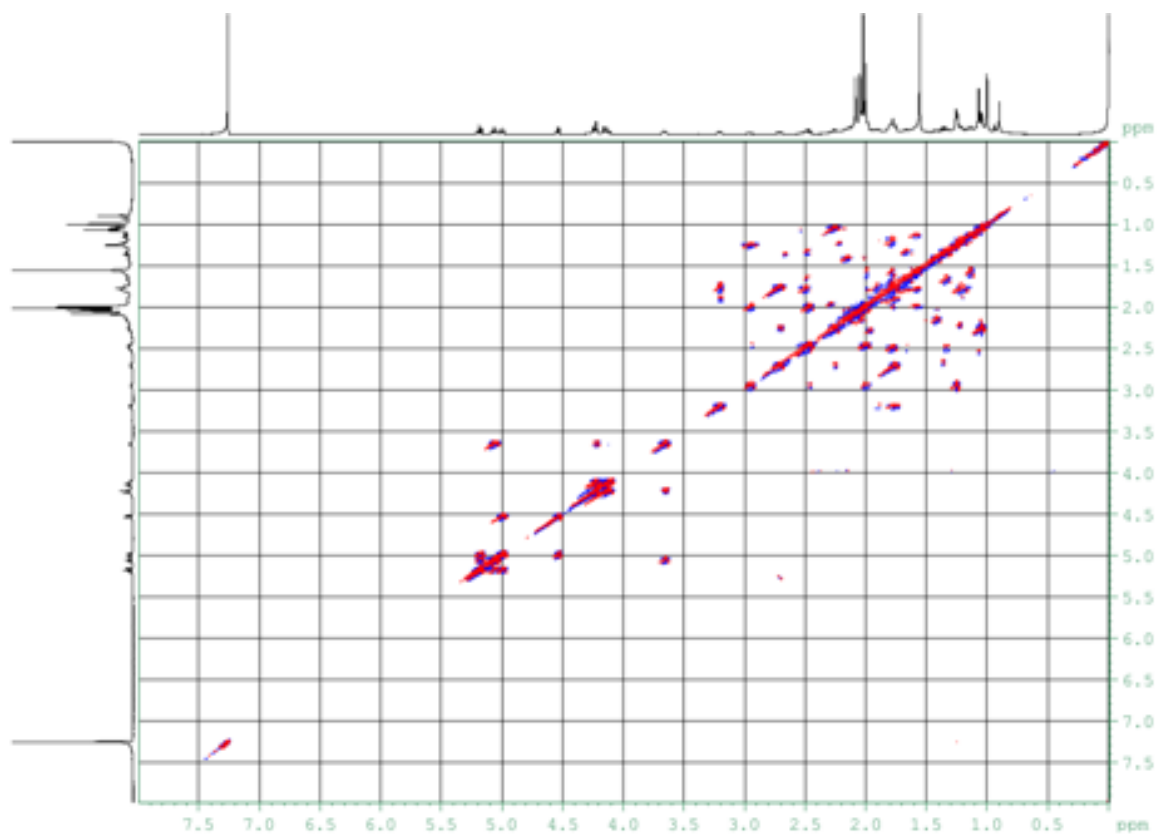

Spectrum S3.8.8: COSY spectrum for compound 8Ac in CDCl<sub>3</sub>

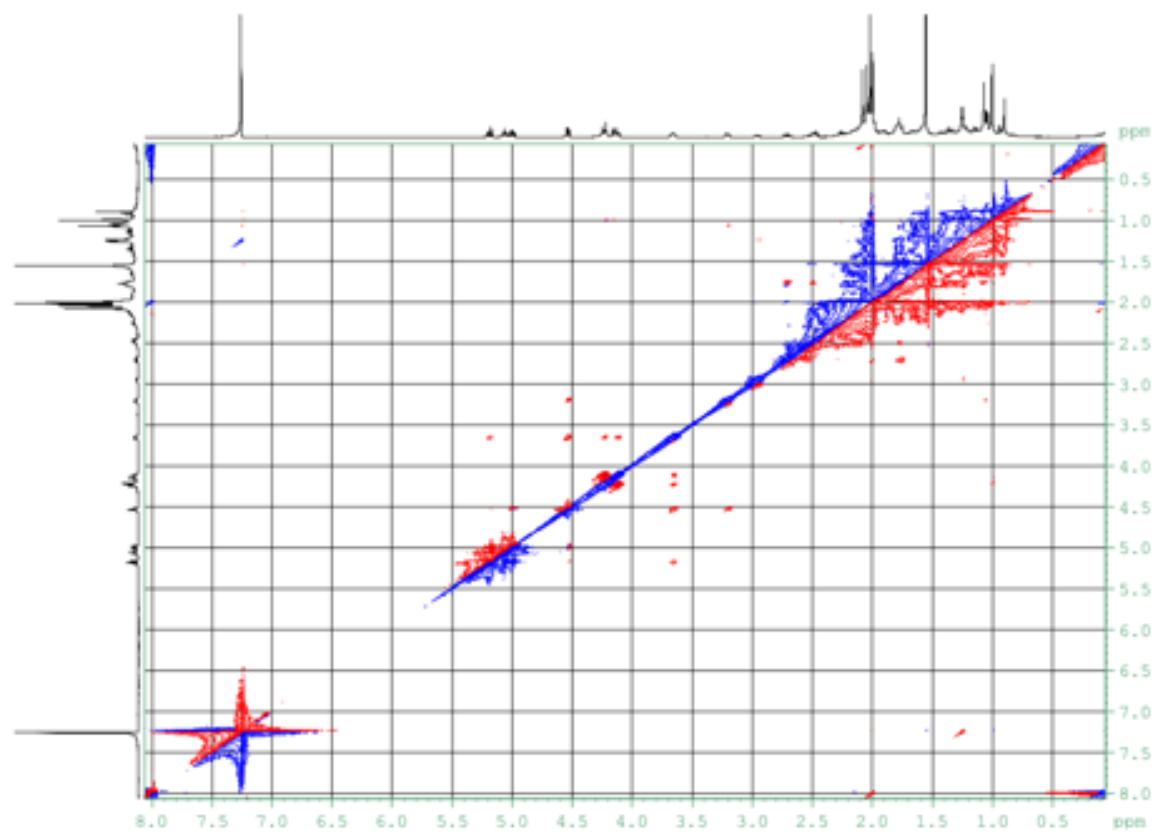

Spectrum S3.8.9: NOESY spectrum for compound 8Ac in CDCl<sub>3</sub>



## Mass Spectrum SmartFormula Report

### Analysis Info

Analysis Name: \\utof\data\kan 12\MS 10983b\_05\_01\_44083.d  
 Method: 2.5min\_cal\_sample\_pos\_Nat\_Mid\_mass.m  
 Sample Name: MSS 10983b  
 Comment:

Acquisition Date: 25/06/2012 17:12:12

Operator: Mass Spec  
 Instrument / Sect: micrOTOF 02

### Acquisition Parameter

|             |            |                      |          |                  |            |
|-------------|------------|----------------------|----------|------------------|------------|
| Source Type | ESI        | Ion Polarity         | Positive | Set Nebulizer    | 2.0 Bar    |
| Focus       | Not active |                      |          | Set Dry Heater   | 180 °C     |
| Scan Begin  | 100 m/z    | Set Capillary        | 4500 V   | Set Dry Gas      | 10.0 l/min |
| Scan End    | 1500 m/z   | Set End Plate Offset | -500 V   | Set Divert Valve | Source     |

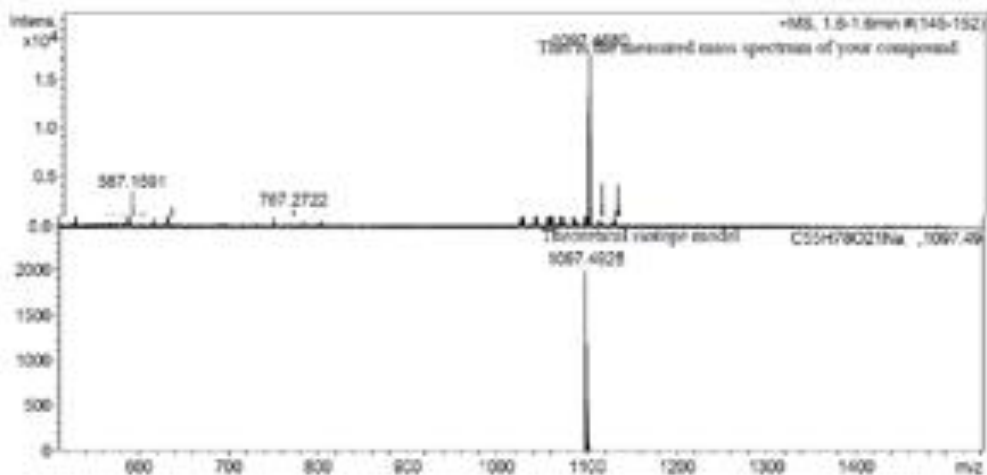

Spectrum S3.9.1: Mass spectrum for compound 9Ac

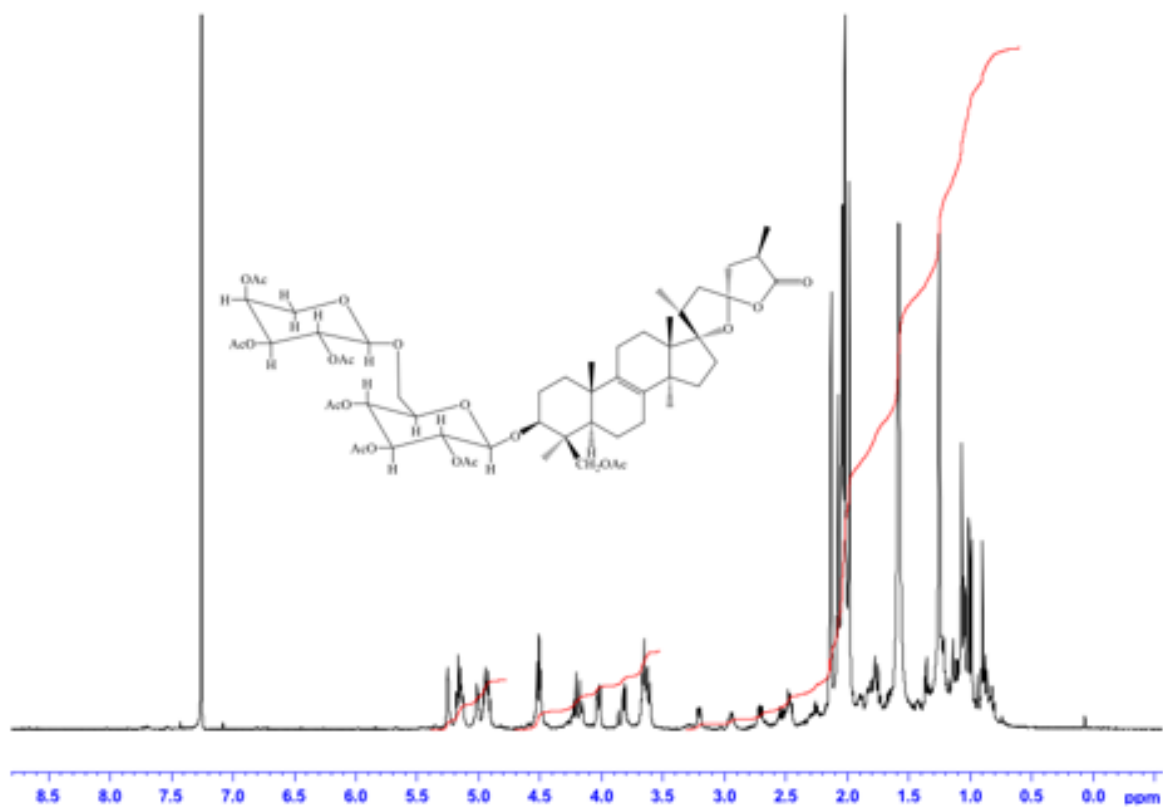

Spectrum S3.9.3: <sup>1</sup>H NMR spectrum for compound 9Ac in CDCl<sub>3</sub>

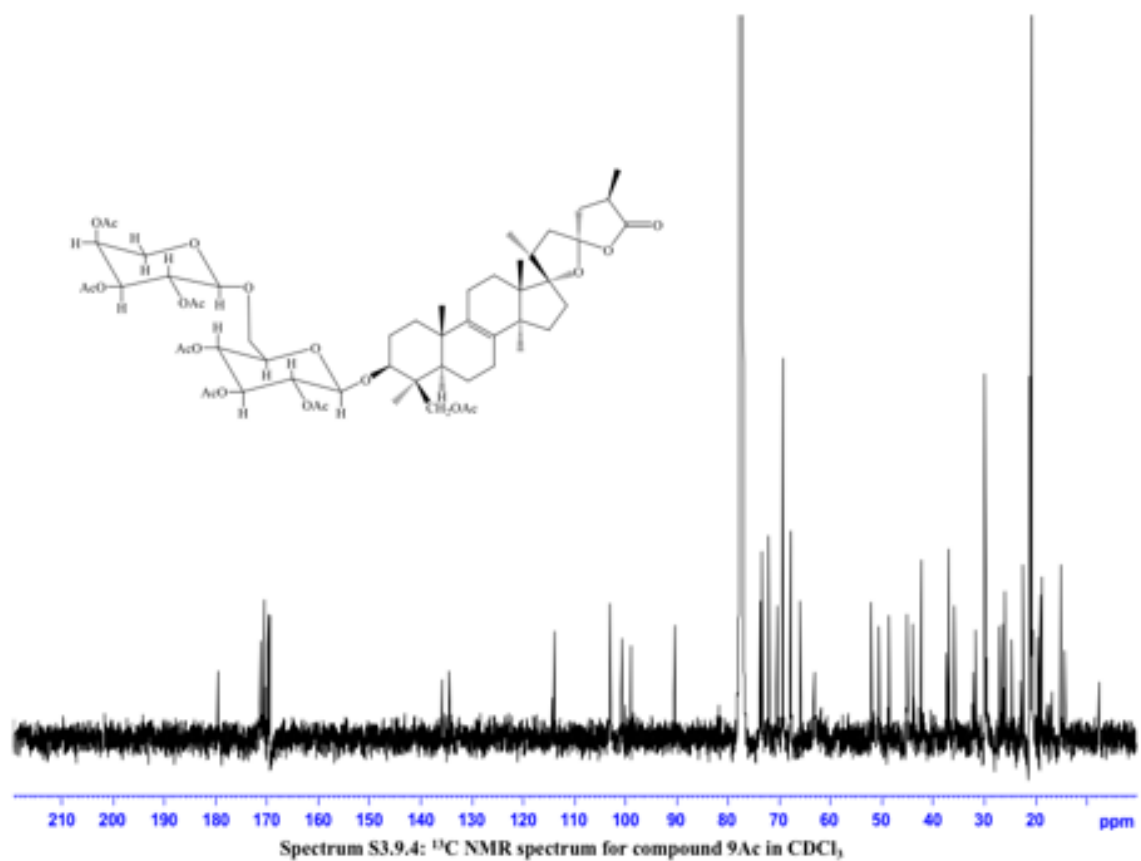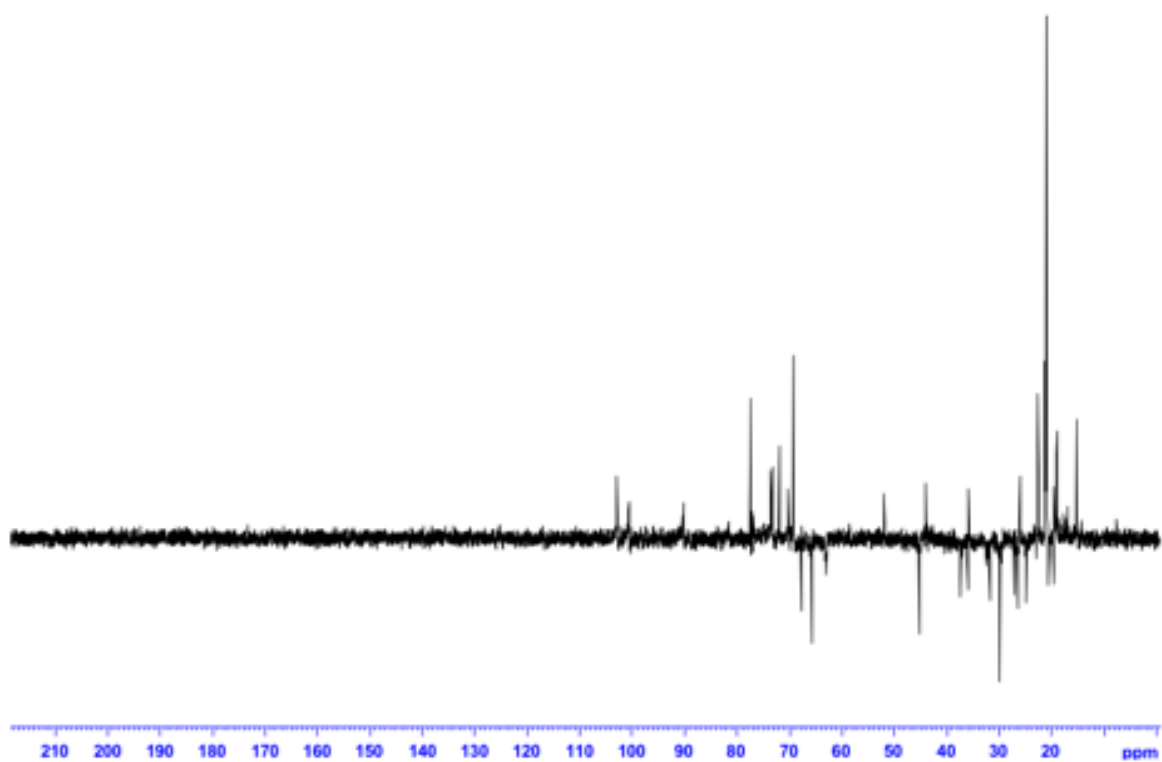

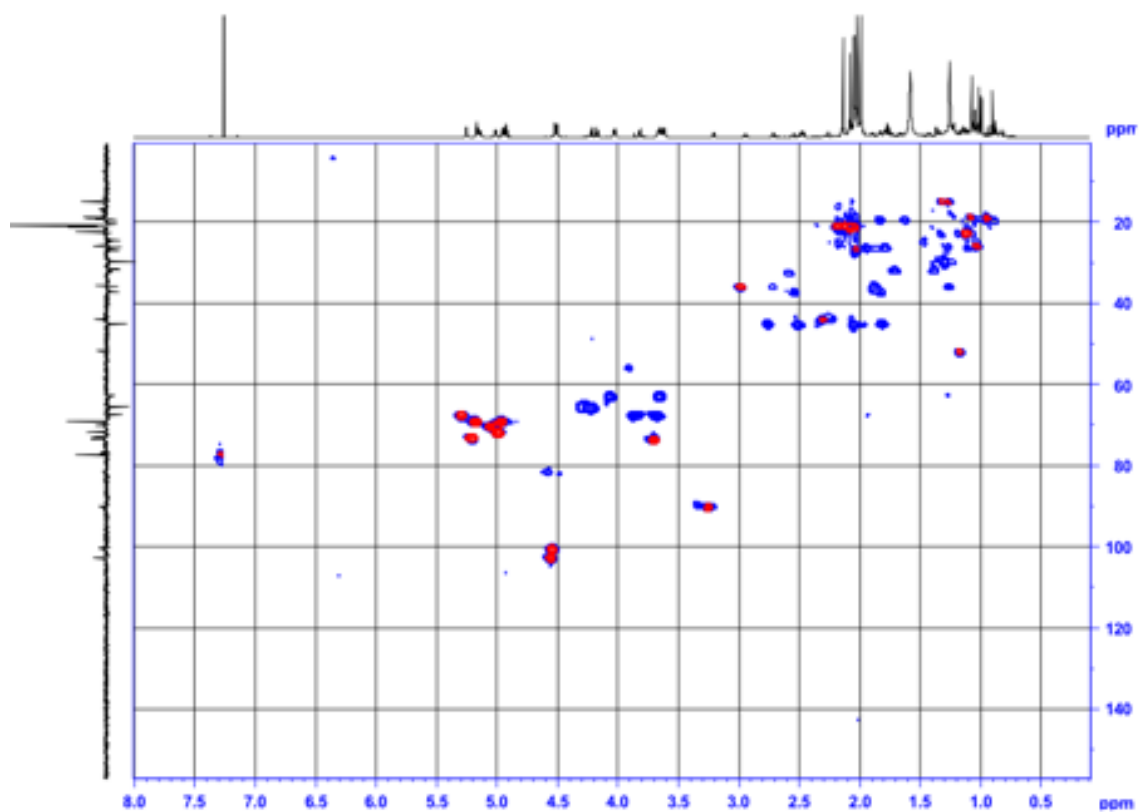

Spectrum S3.9.6: HSQCDEPT spectrum for compound 9Ac in CDCl<sub>3</sub>

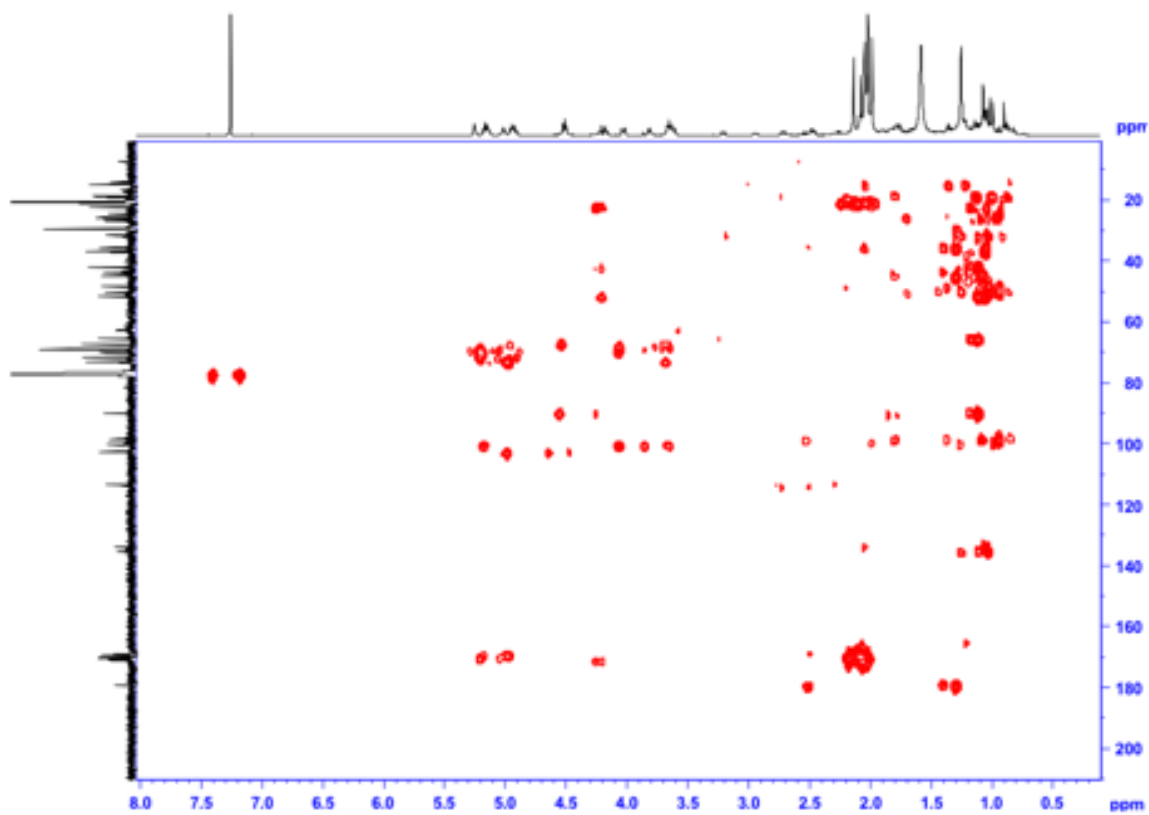

Spectrum S3.9.7: HMBC spectrum for compound 9Ac in CDCl<sub>3</sub>

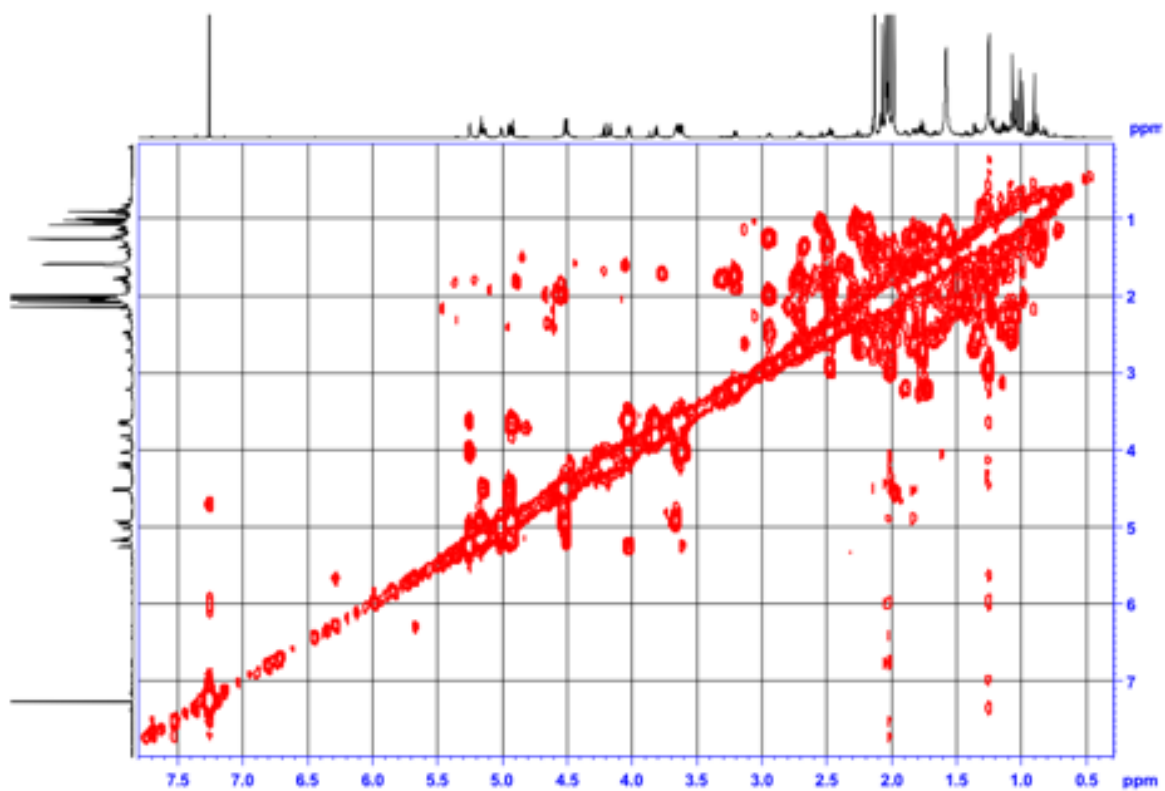

Spectrum S3.9.8: COSY spectrum for compound 9Ac in CDCl<sub>3</sub>

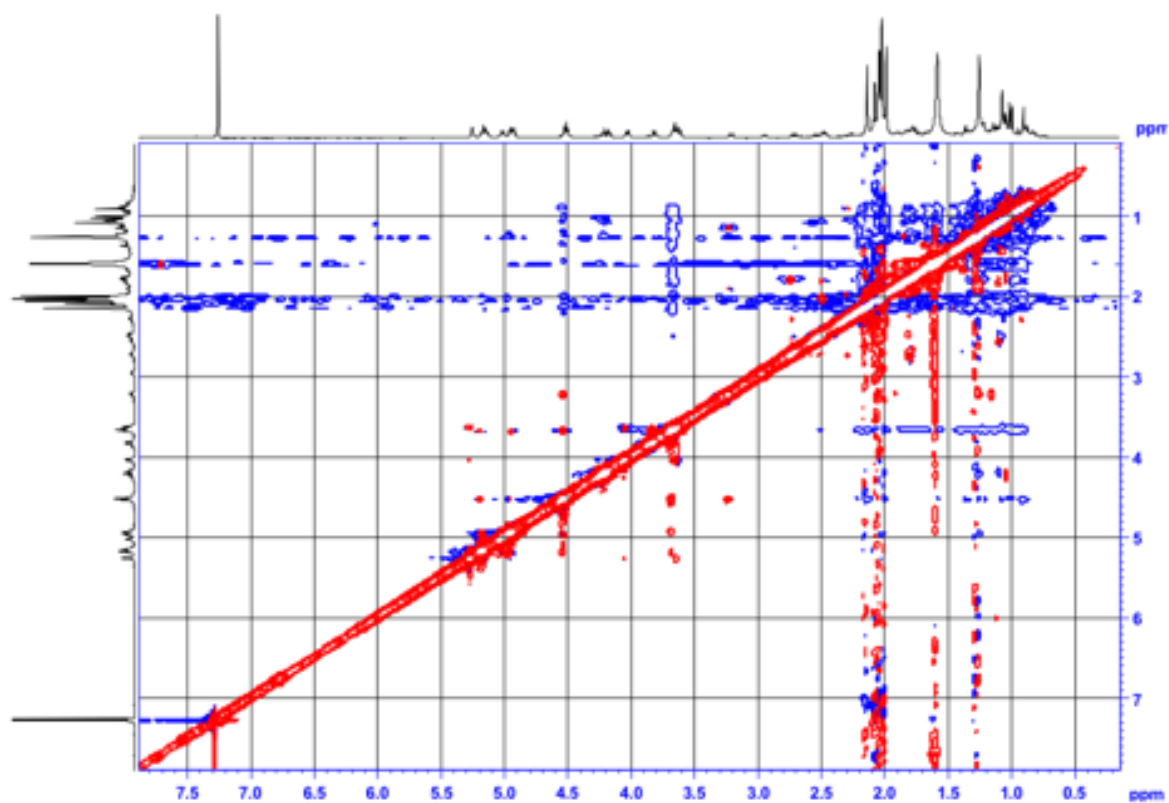

Spectrum S3.9.9: NOESY spectrum for compound 9Ac in CDCl<sub>3</sub>

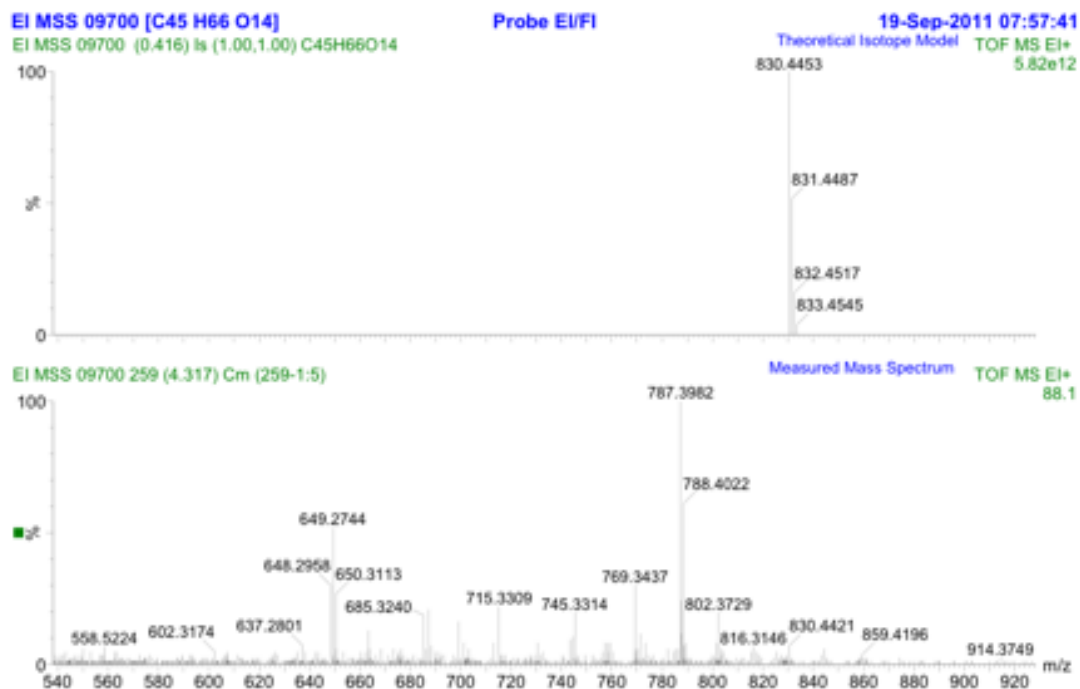

Spectrum S3.10.1: Mass spectrum for compound 10Ac

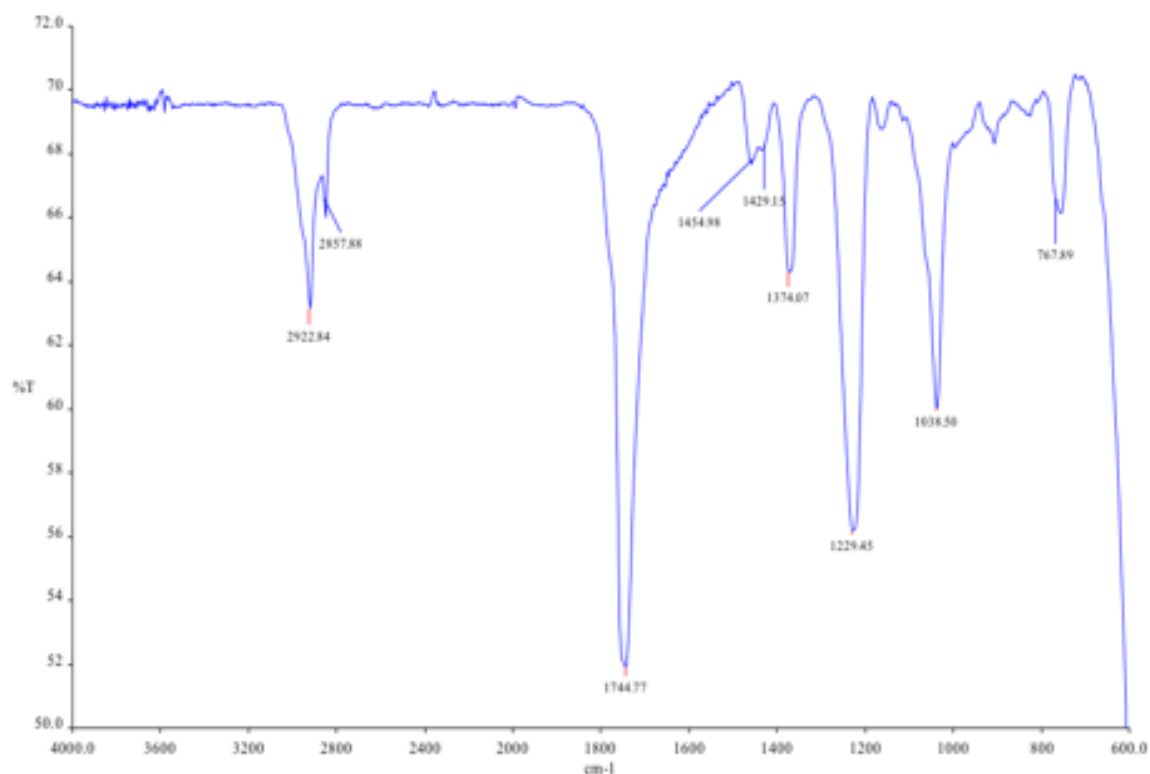

Spectrum S3.10.2: FTIR spectrum for compound 10Ac

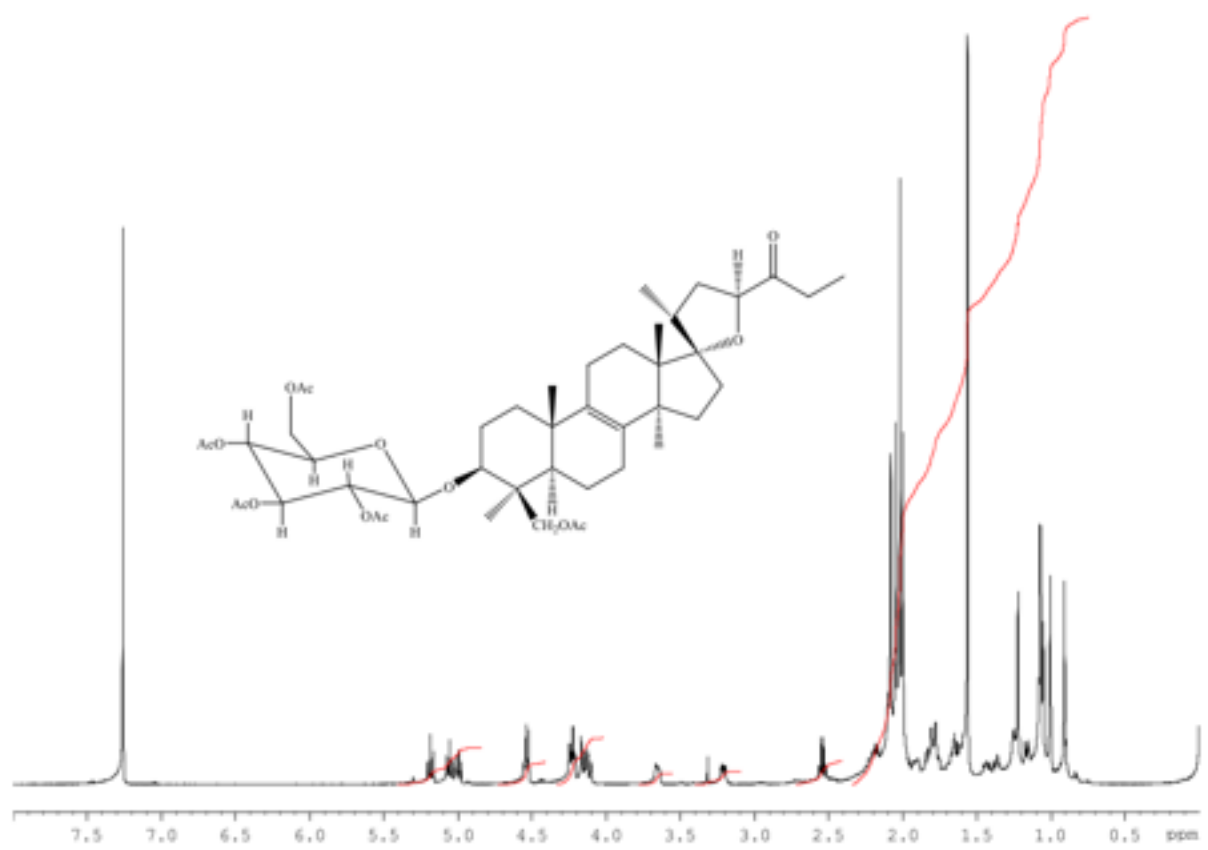

Spectrum S3.10.3: <sup>1</sup>H NMR spectrum for compound 10Ac in CDCl<sub>3</sub>

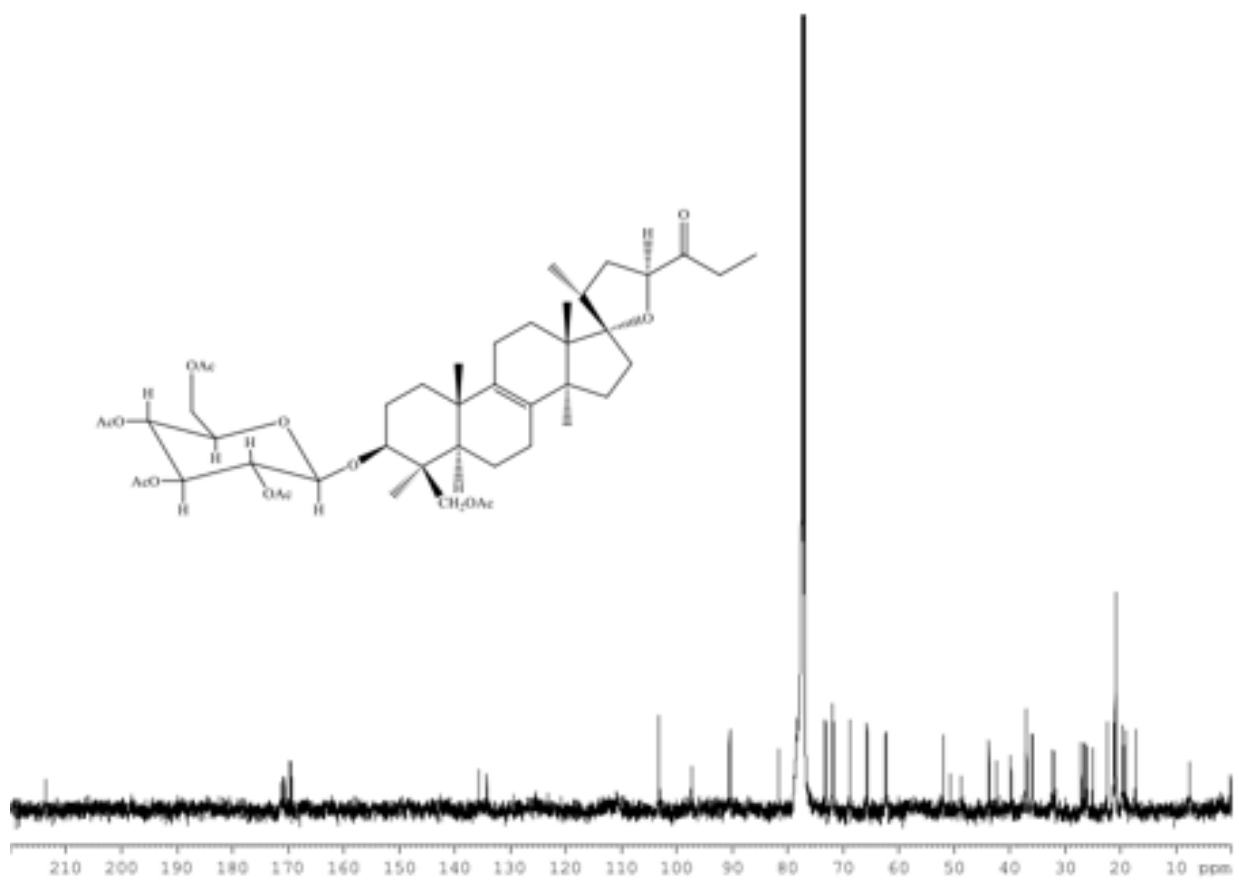

Spectrum S3.10.4: <sup>13</sup>C NMR spectrum for compound 10Ac in CDCl<sub>3</sub>

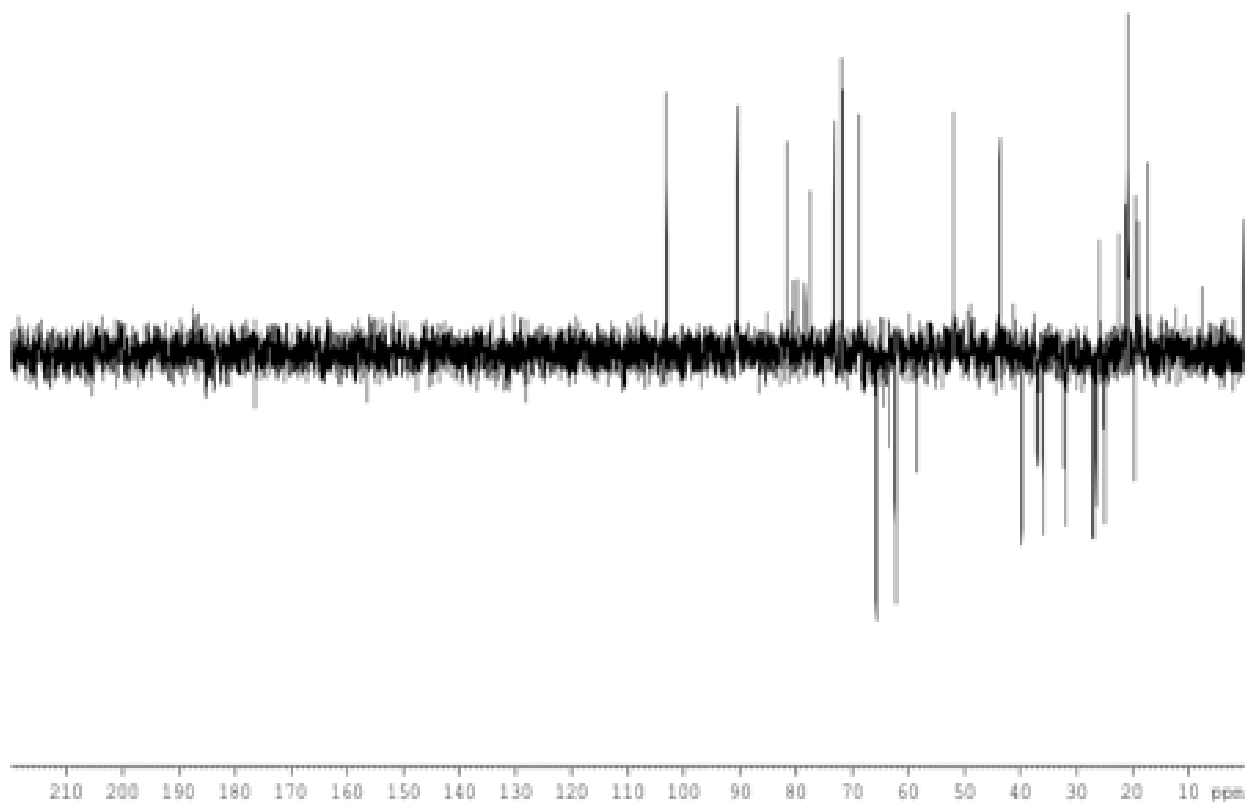

Spectrum S3.10.5: DEPT spectrum for compound 10Ac in CDCl<sub>3</sub>

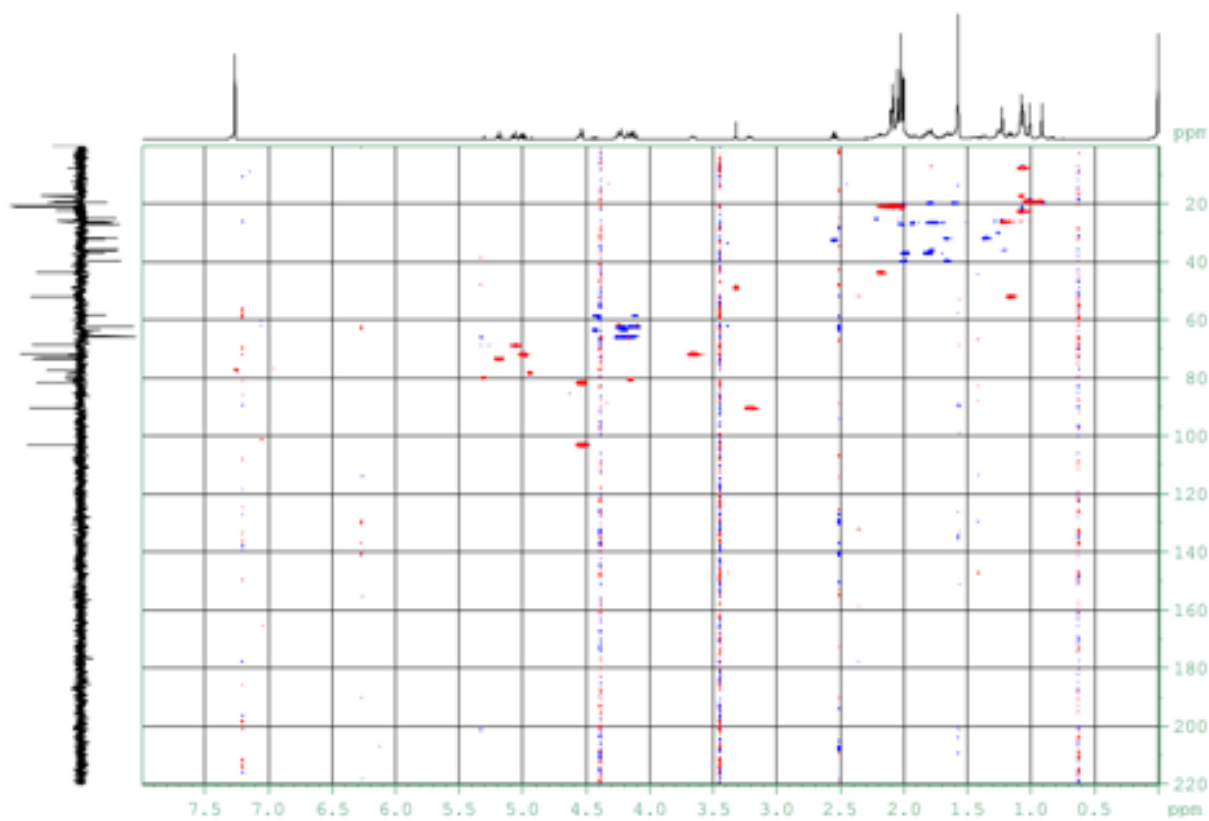

Spectrum S3.10.6: HSQCDEPT spectrum for compound 10Ac in CDCl<sub>3</sub>

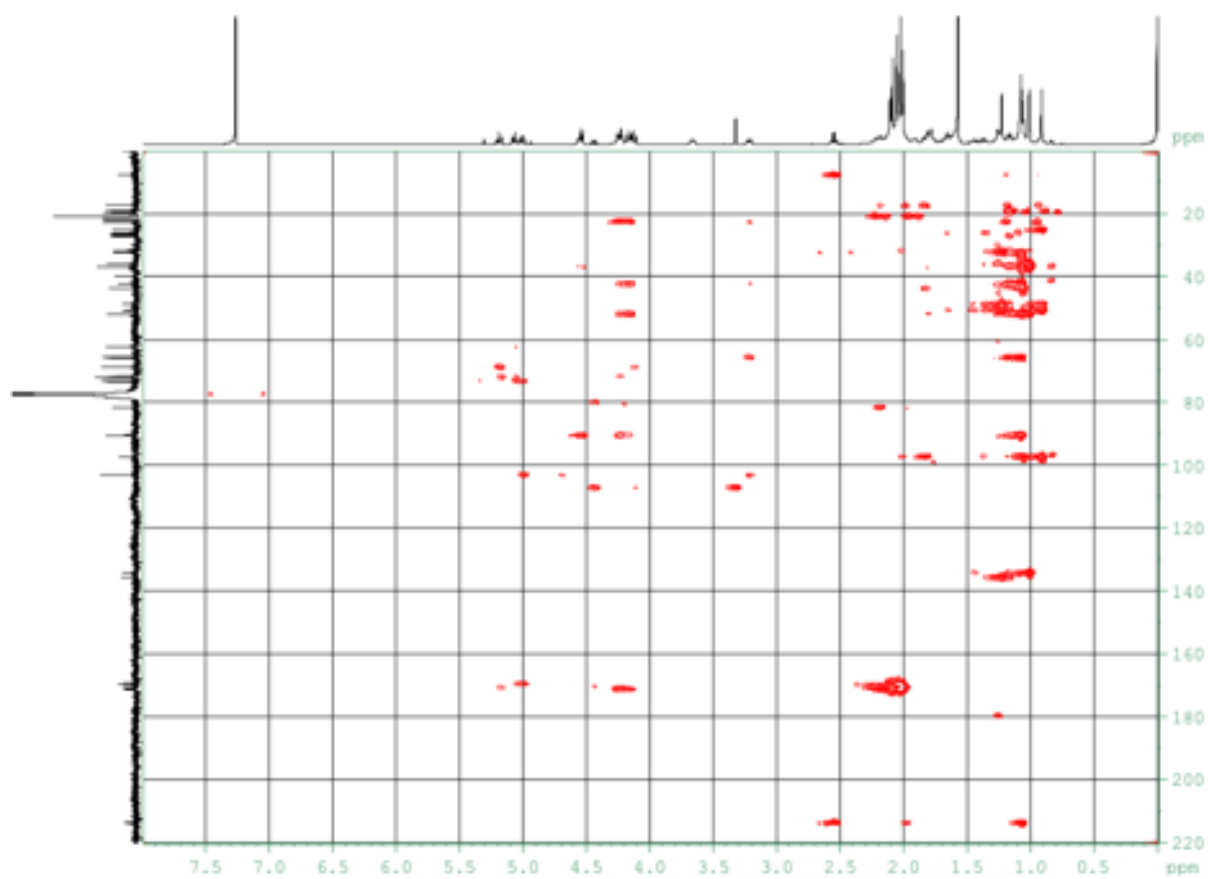

Spectrum S3.10.7: HMBC spectrum for compound 10Ac in CDCl<sub>3</sub>

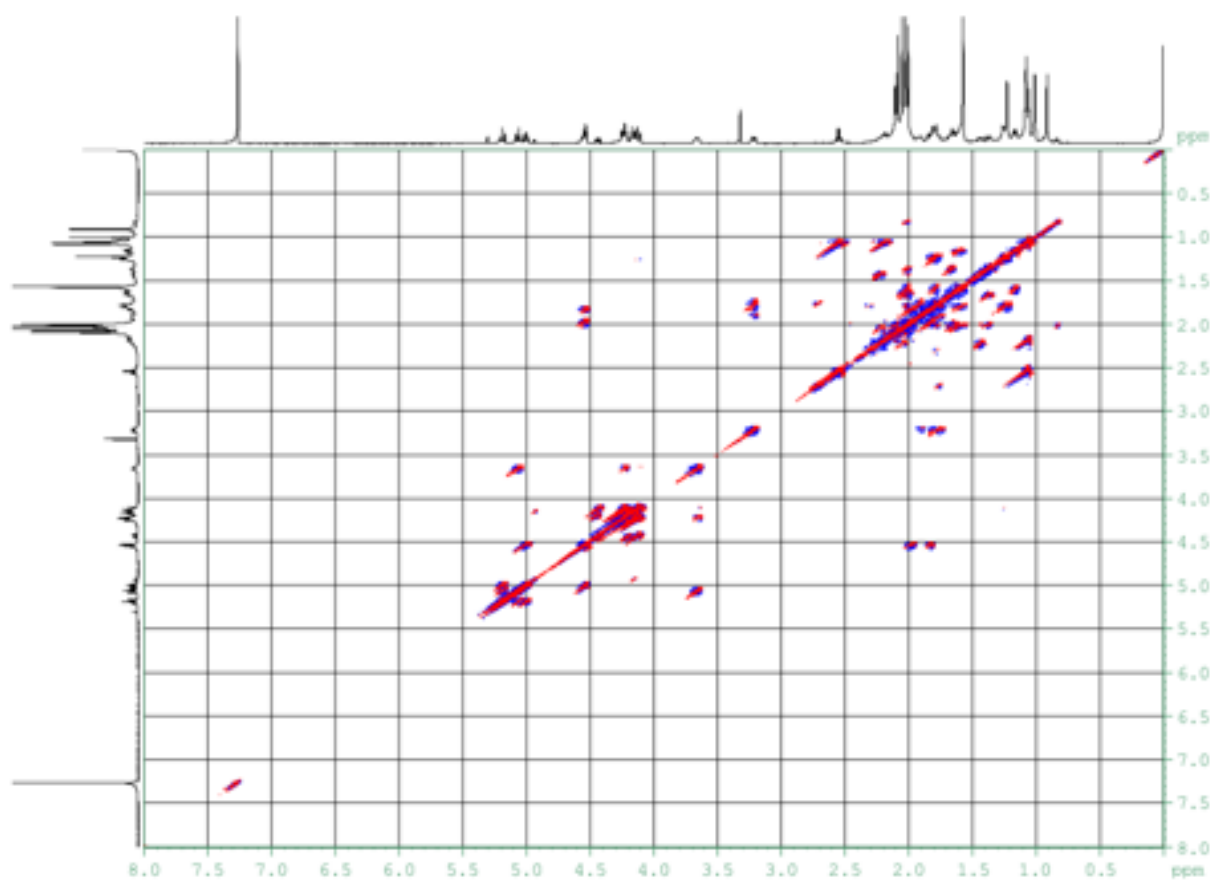

Spectrum S3.10.8: COSY spectrum for compound 10Ac in CDCl<sub>3</sub>



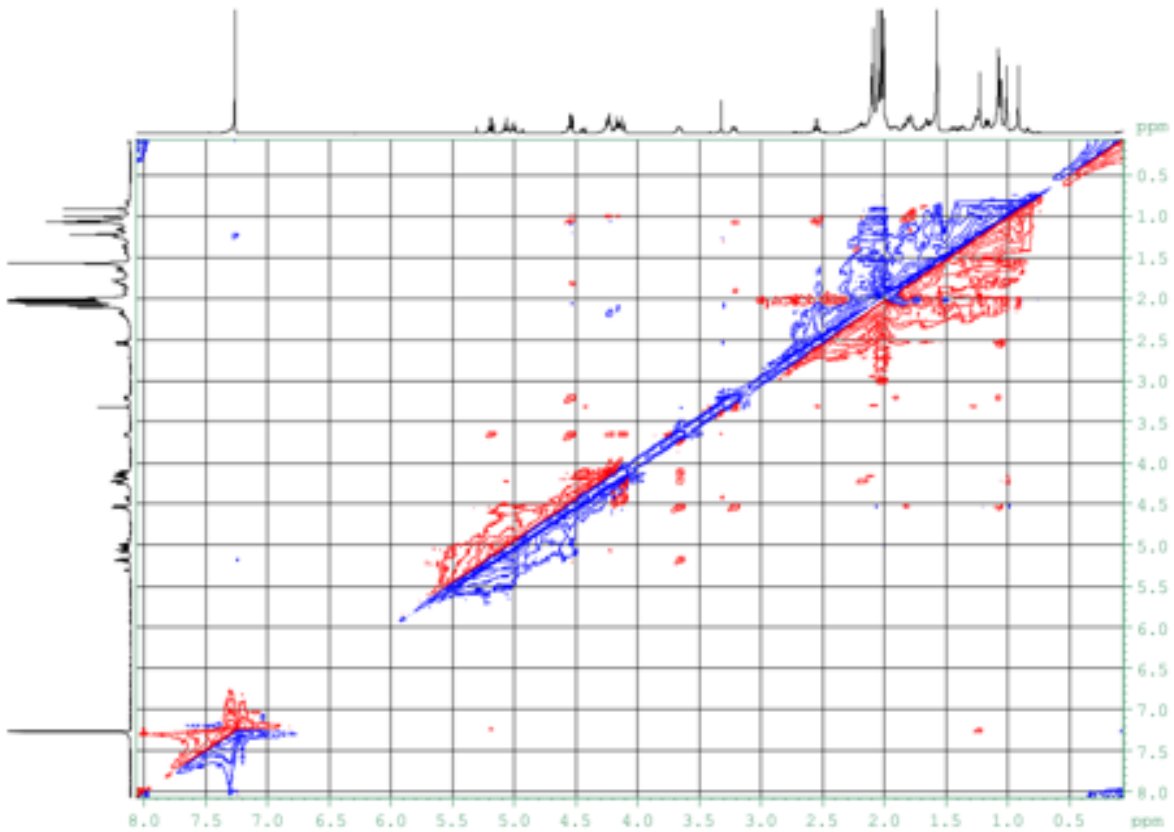

Spectrum S3.10.9: NOESY spectrum for compound 10Ac in CDCl<sub>3</sub>

### Mass Spectrum SmartFormula Report

| Analysis Info         |                                              | Acquisition Date     |             |
|-----------------------|----------------------------------------------|----------------------|-------------|
| Analysis Name         | UltrahighDataJun 12\MSS 10980b_83_01_44081.d | 25/06/2012           | 17:05:15    |
| Method                | 2.5min_col_sample_pos_NoI_Mid_mass.m         | Operator             | Mass Spec   |
| Sample Name           | MSS 10980b                                   | Instrument / Sent    | micrOTOF 92 |
| Comment               |                                              |                      |             |
| Acquisition Parameter |                                              |                      |             |
| Source Type           | ESI                                          | Ion Polarity         | Positive    |
| Focus                 | Not active                                   | Set Nebulizer        | 2.0 Bar     |
| Scan Begin            | 100 m/z                                      | Set Dry Heater       | 180 °C      |
| Scan End              | 1500 m/z                                     | Set Capillary        | 4500 V      |
|                       |                                              | Set End Plate Offset | -500 V      |
|                       |                                              | Set Dry Gas          | 10.0 l/min  |
|                       |                                              | Set Divert Valve     | Source      |

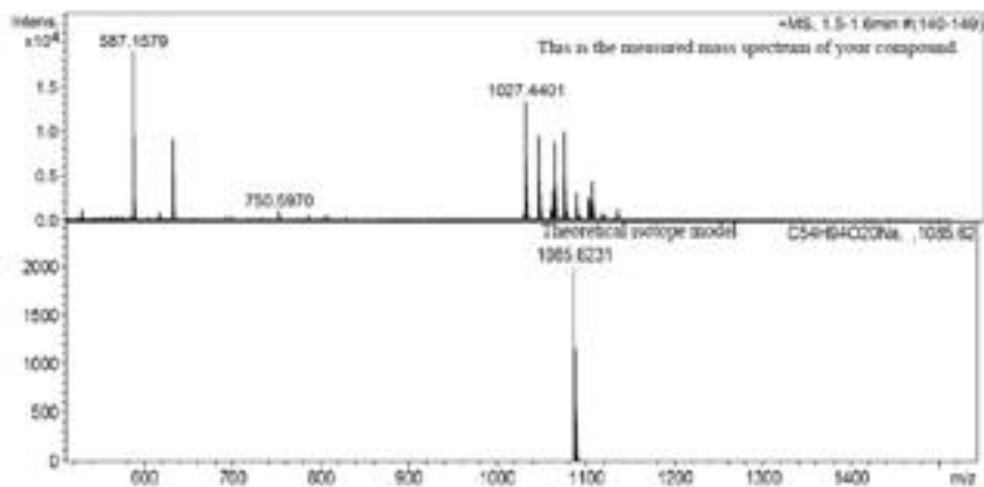

Spectrum S.3.11.1: Mass spectrum for compound 11Ac

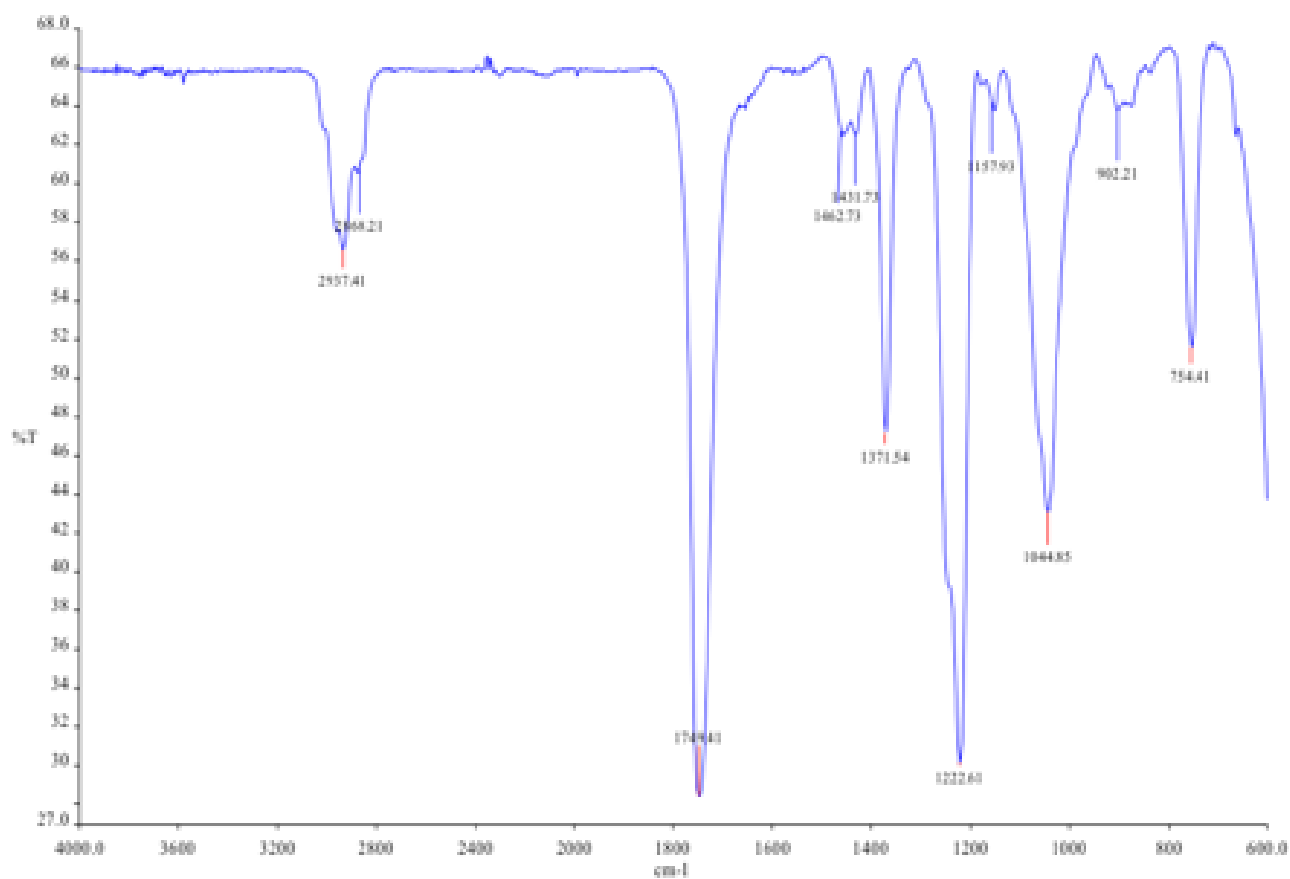

Spectrum S3.11.2: FTIR spectrum for compound 11Ac

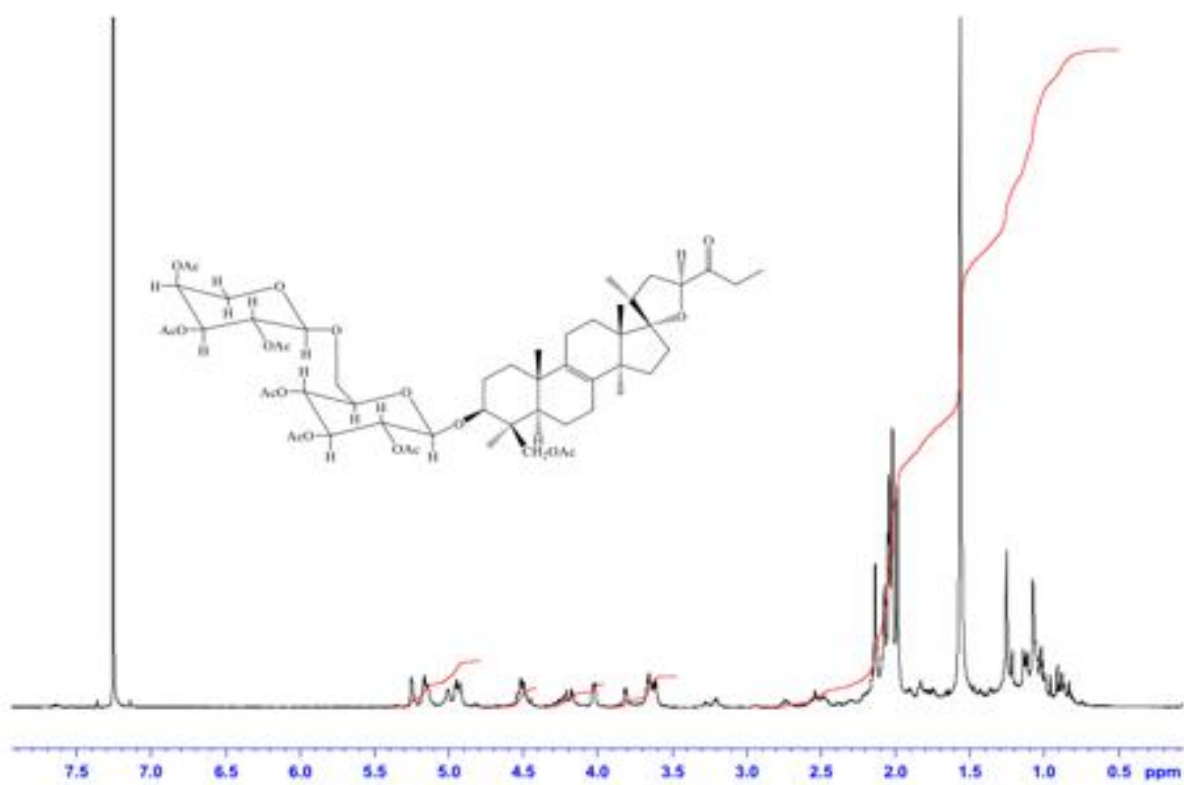

Spectrum S3.11.3: <sup>1</sup>H NMR spectrum for compound 11Ac in CDCl<sub>3</sub>

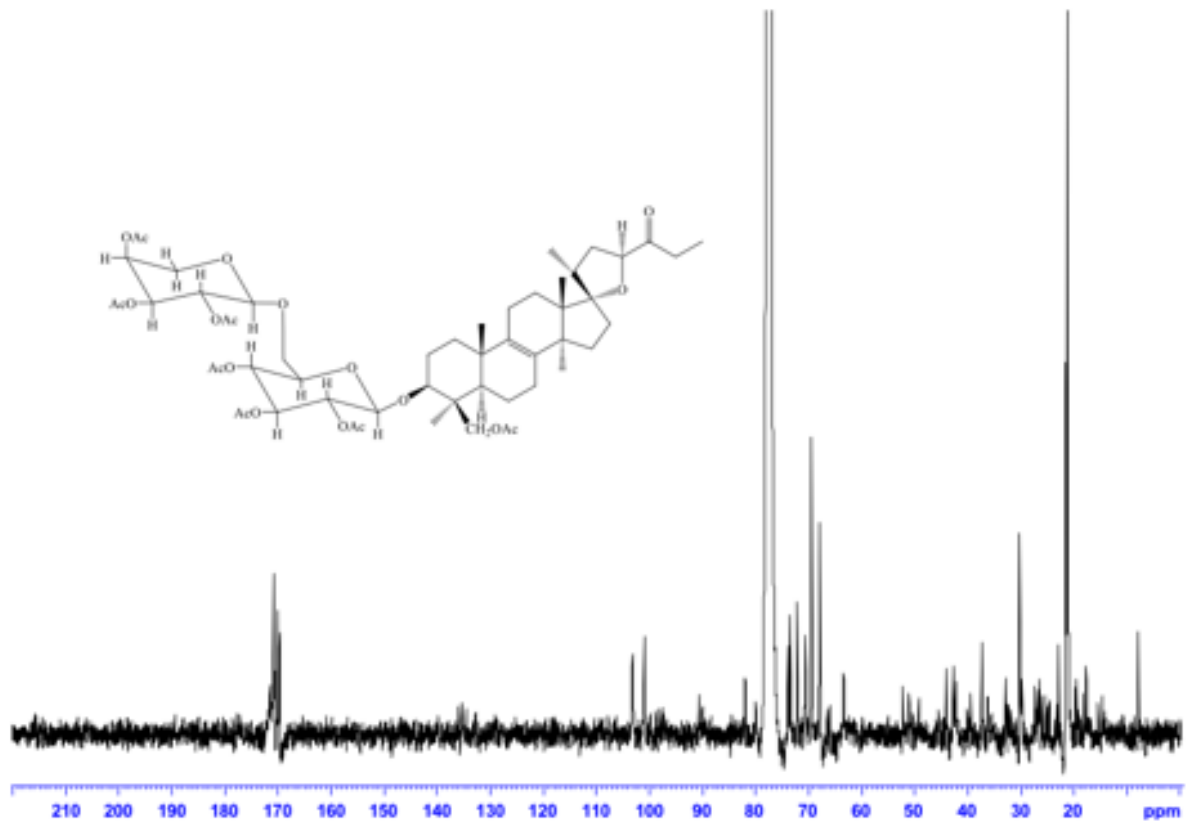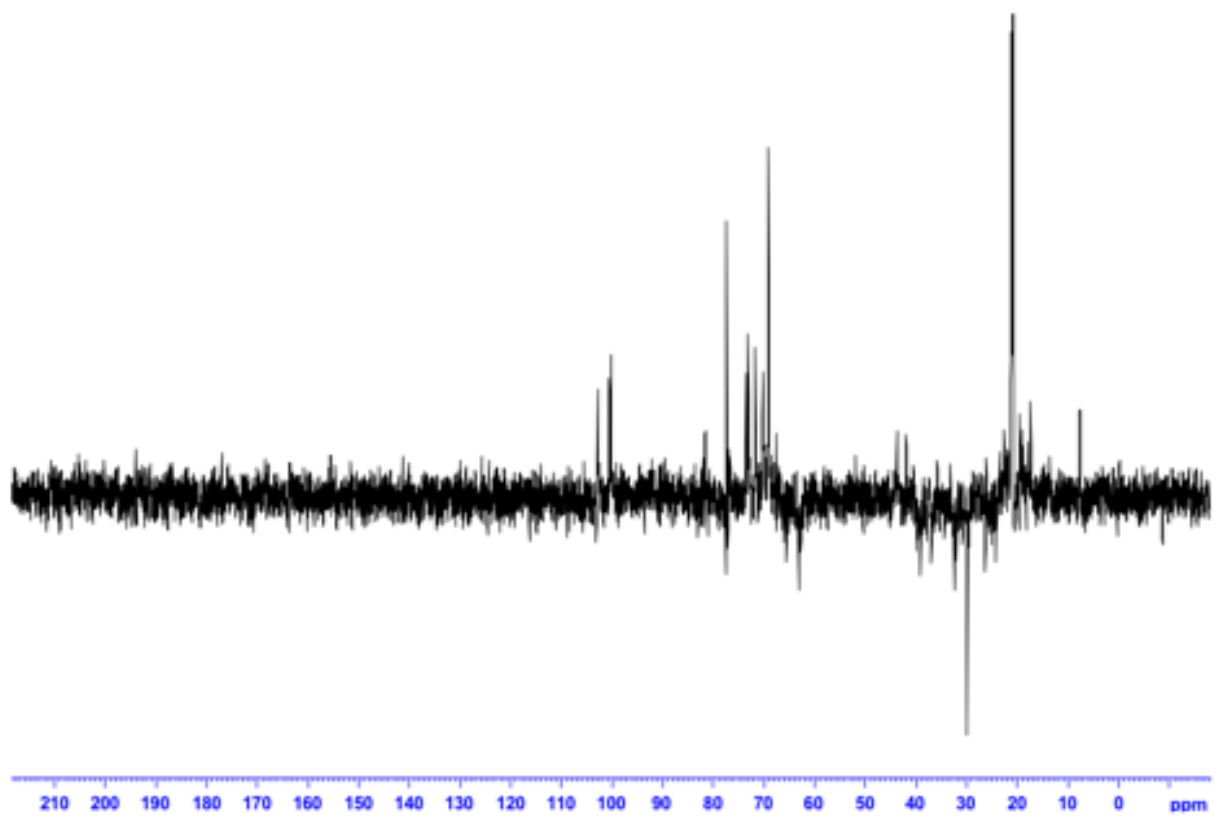

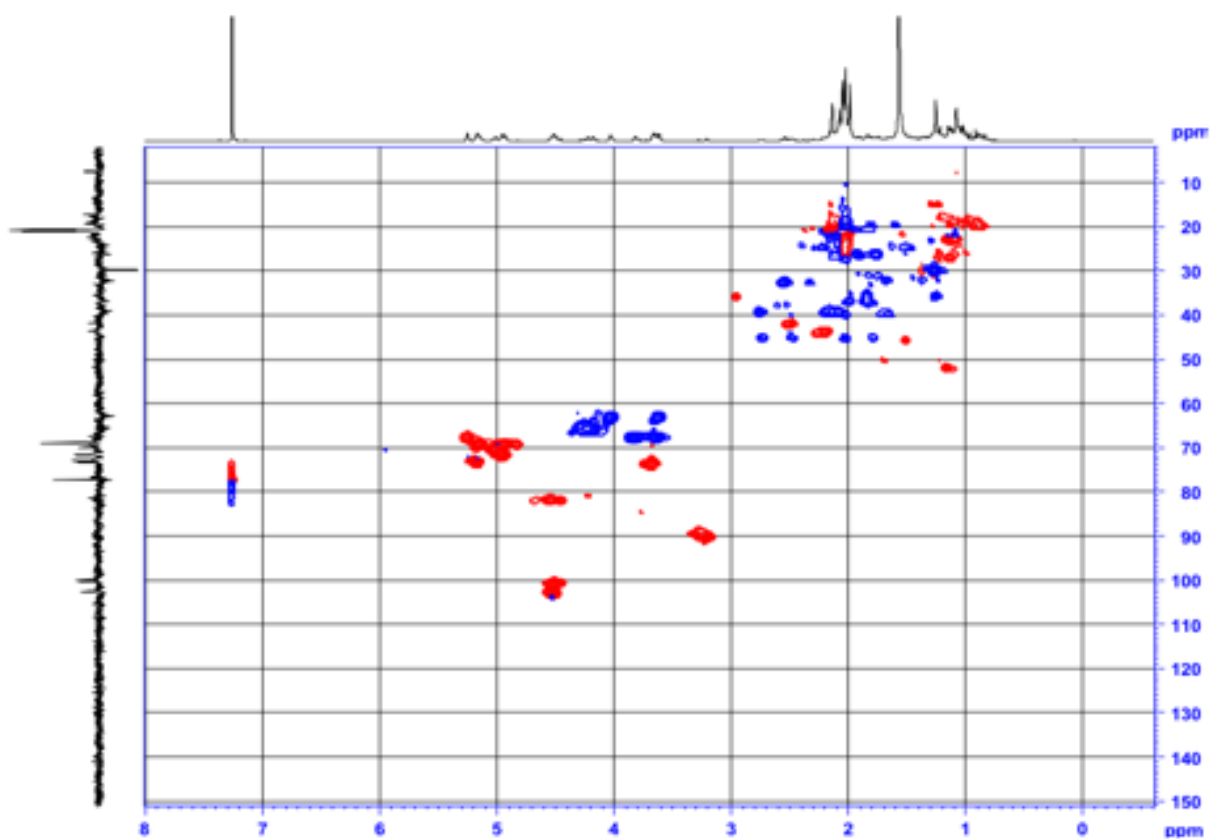

Spectrum S.3.11.6: HSQCDEPT spectrum for compound 11Ac in CDCl<sub>3</sub>

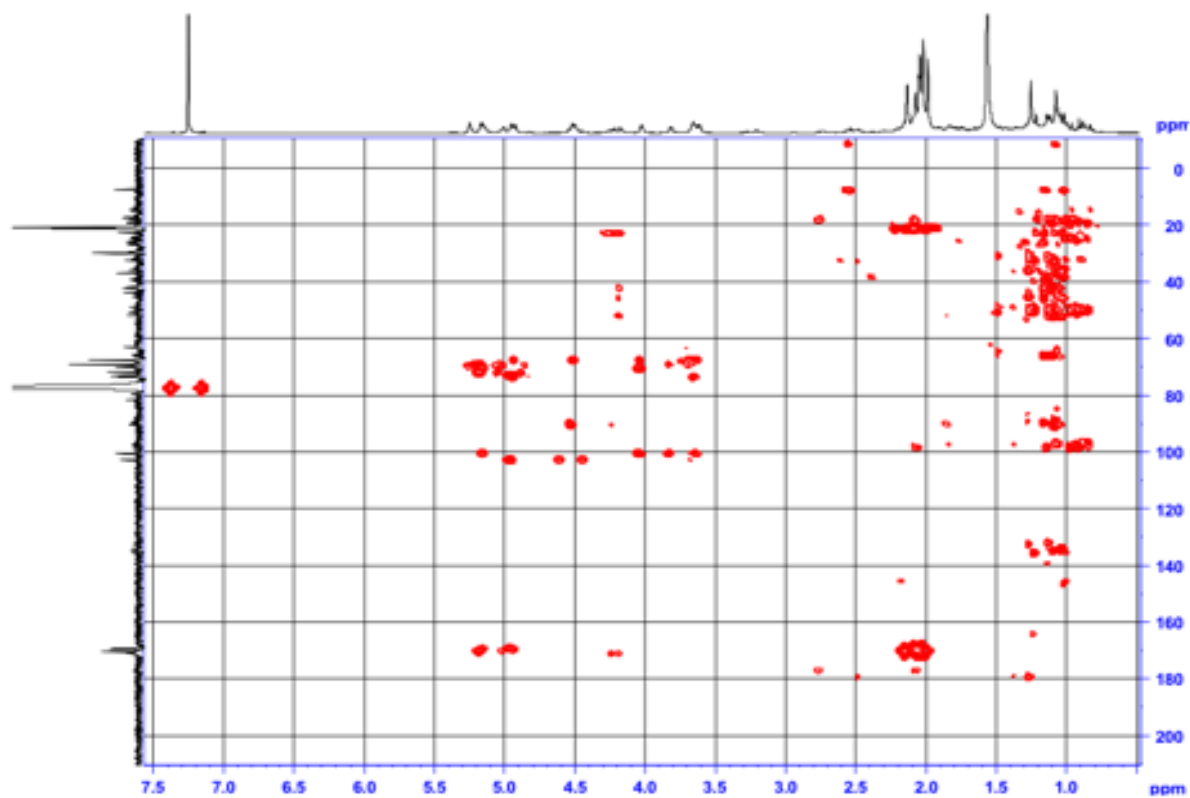

Spectrum S.3.11.7: HMBC spectrum for compound 11Ac in CDCl<sub>3</sub>

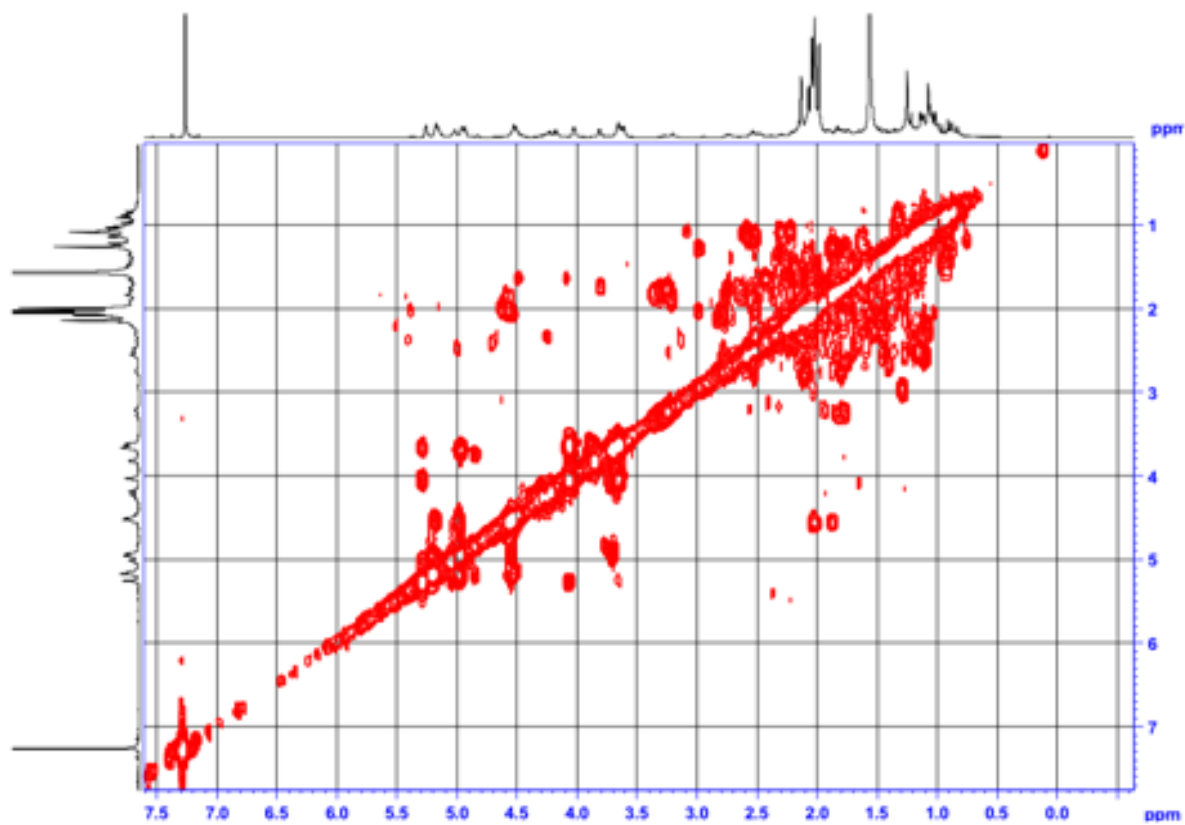

Spectrum S.3.11.8: COSY spectrum for compound 11Ac in  $\text{CDCl}_3$ ,

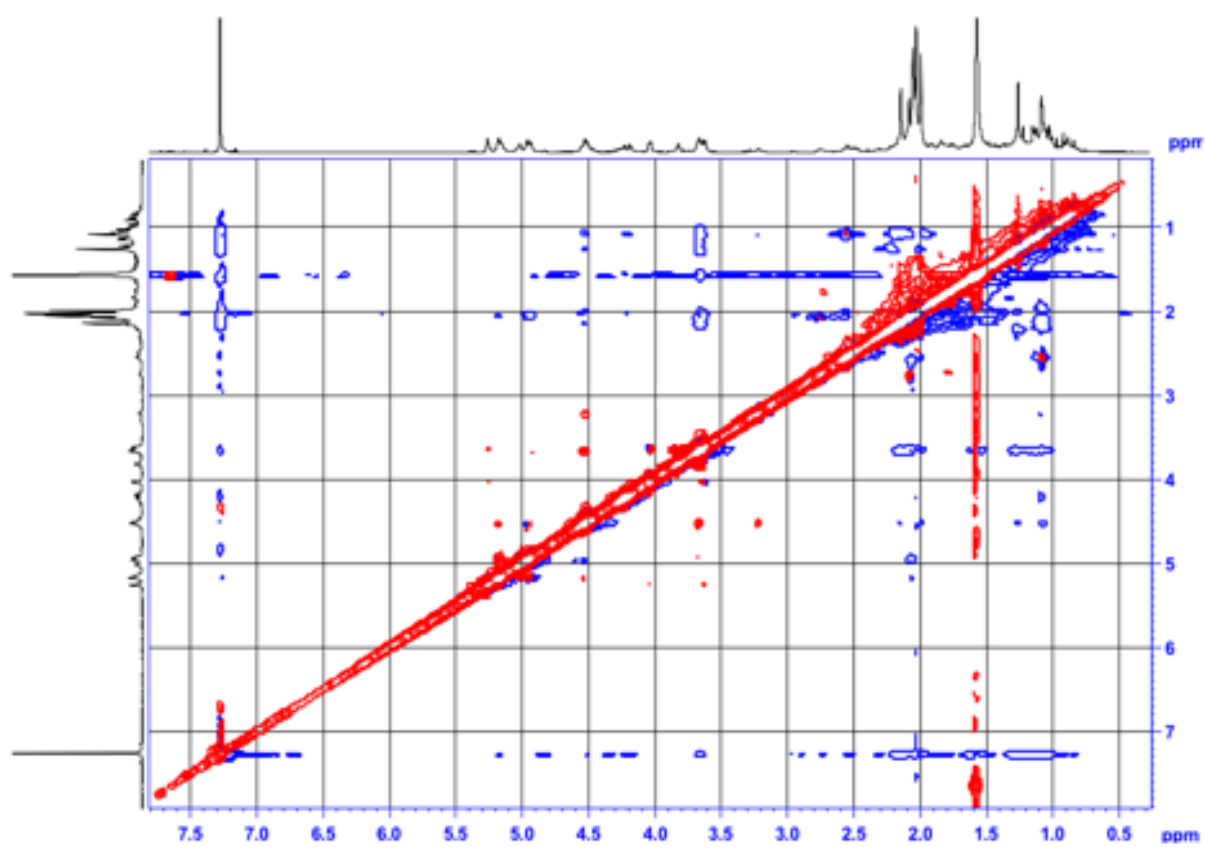

Spectrum S.3.11.9: NOESY spectrum for compound 11Ac in  $\text{CDCl}_3$ ,

## Mass Spectrum SmartFormula Report

### Analysis Info

Analysis Name: Z:\Sep 11\MSS09703\_19\_01\_32461.d  
 Method: 2.5min\_cal\_sample\_pos\_Naf\_11-10-10.m  
 Sample Name: MSS09703  
 Comment:

Acquisition Date: 10/09/2011 10:58 am

Operator: Mass Spec  
 Instrument / Ser#: micrOTOF 92

### Acquisition Parameter

|             |            |                      |          |                  |            |
|-------------|------------|----------------------|----------|------------------|------------|
| Source Type | ESI        | Ion Polarity         | Positive | Set Nebulizer    | 2.0 Bar    |
| Focus       | Not active |                      |          | Set Dry Heater   | 180 °C     |
| Scan Begin  | 100 m/z    | Set Capillary        | 4500 V   | Set Dry Gas      | 83.0 l/min |
| Scan End    | 1800 m/z   | Set End Plate Offset | -500 V   | Set Divert Valve | Source     |

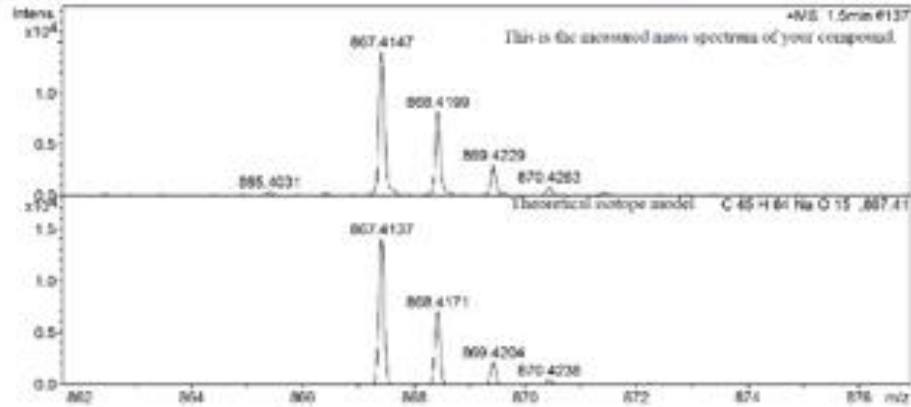

| Meas. m/z | # | Formula           | m/z      | err [ppm] | Mean err [ppm] | rdc  | e <sup>-</sup> | Conf | mSigma |
|-----------|---|-------------------|----------|-----------|----------------|------|----------------|------|--------|
| 867.4147  | 1 | C 45 H 64 Na O 15 | 867.4137 | +1.1      | -1.9           | 13.5 | even           |      | 50.49  |

Spectrum S.3.12.1: Mass spectrum for compound 12Ac

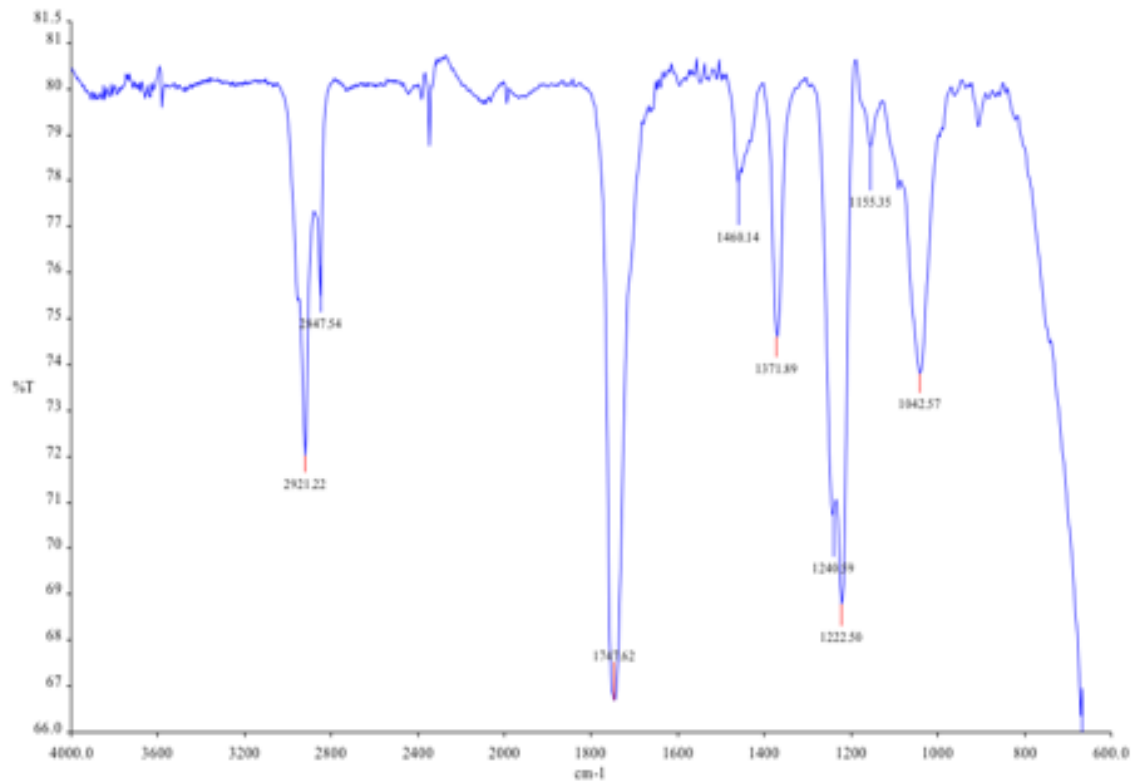

Spectrum S.3.12.2: FTIR spectrum for compound 12Ac

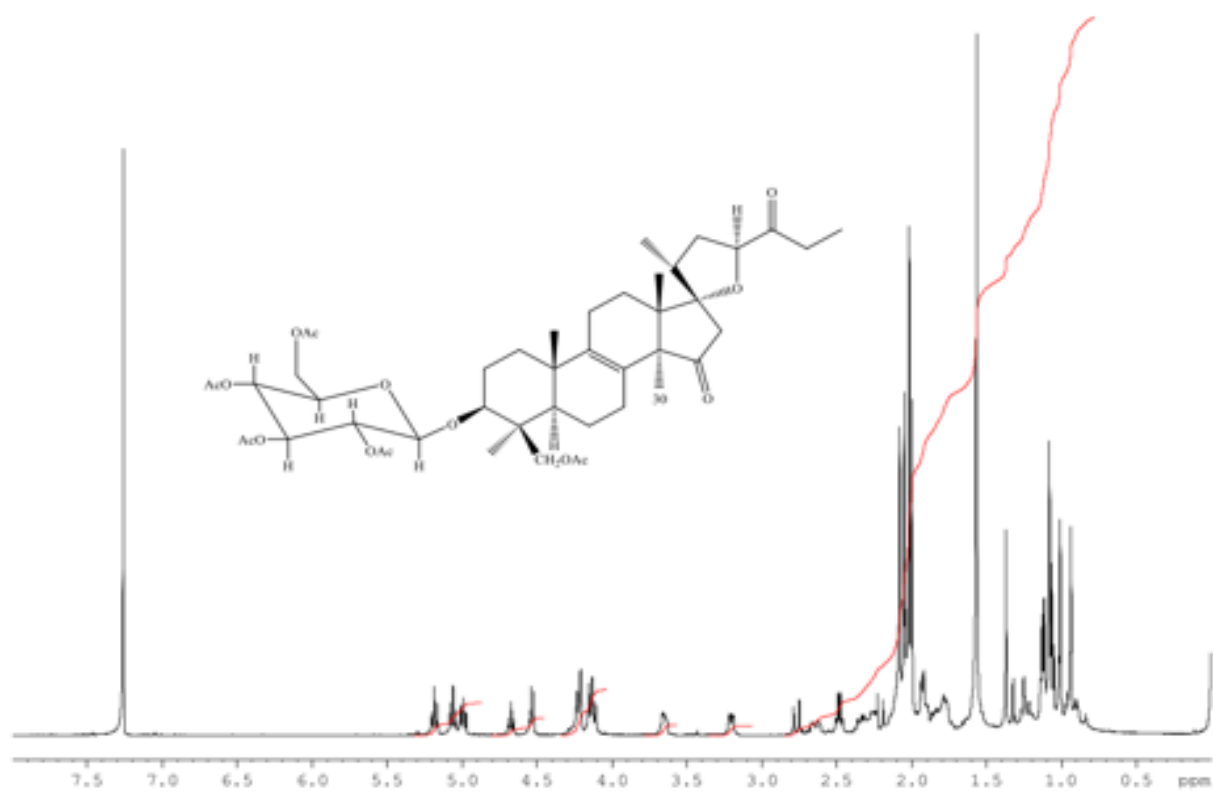

Spectrum S3.12.3: <sup>1</sup>H NMR spectrum for compound 12Ac in CDCl<sub>3</sub>.

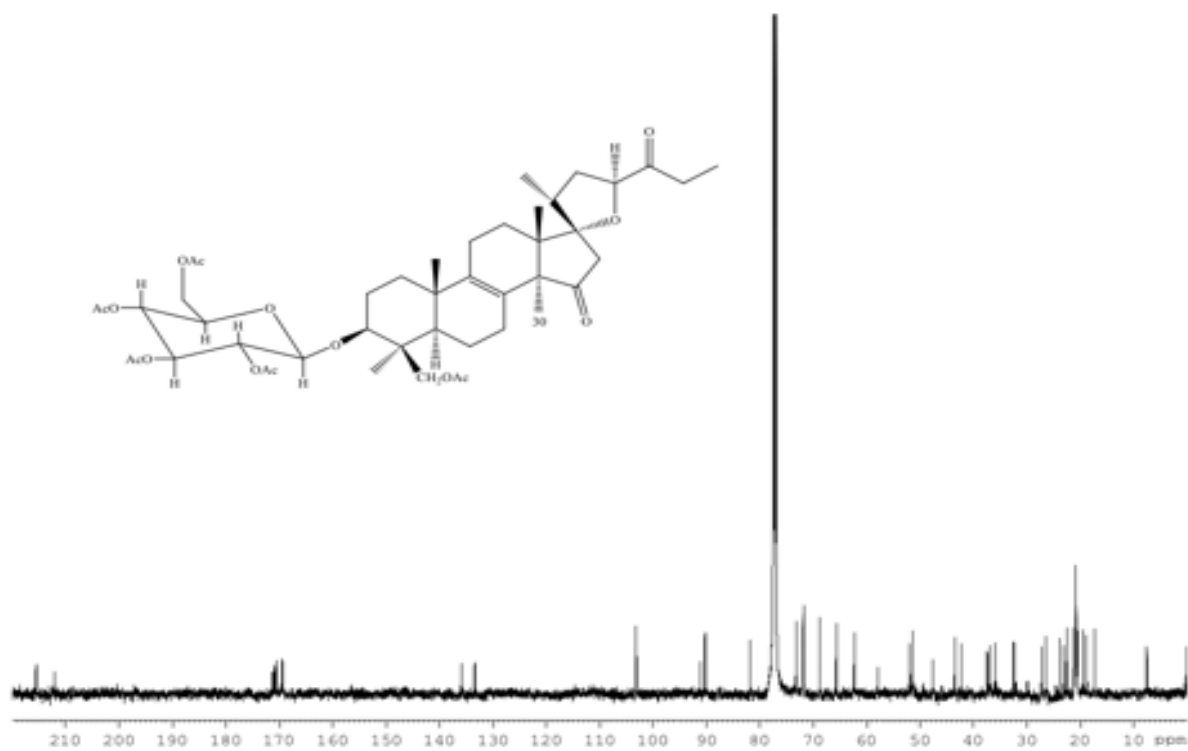

Spectrum S3.12.4: <sup>13</sup>C NMR spectrum for compound 12Ac in CDCl<sub>3</sub>

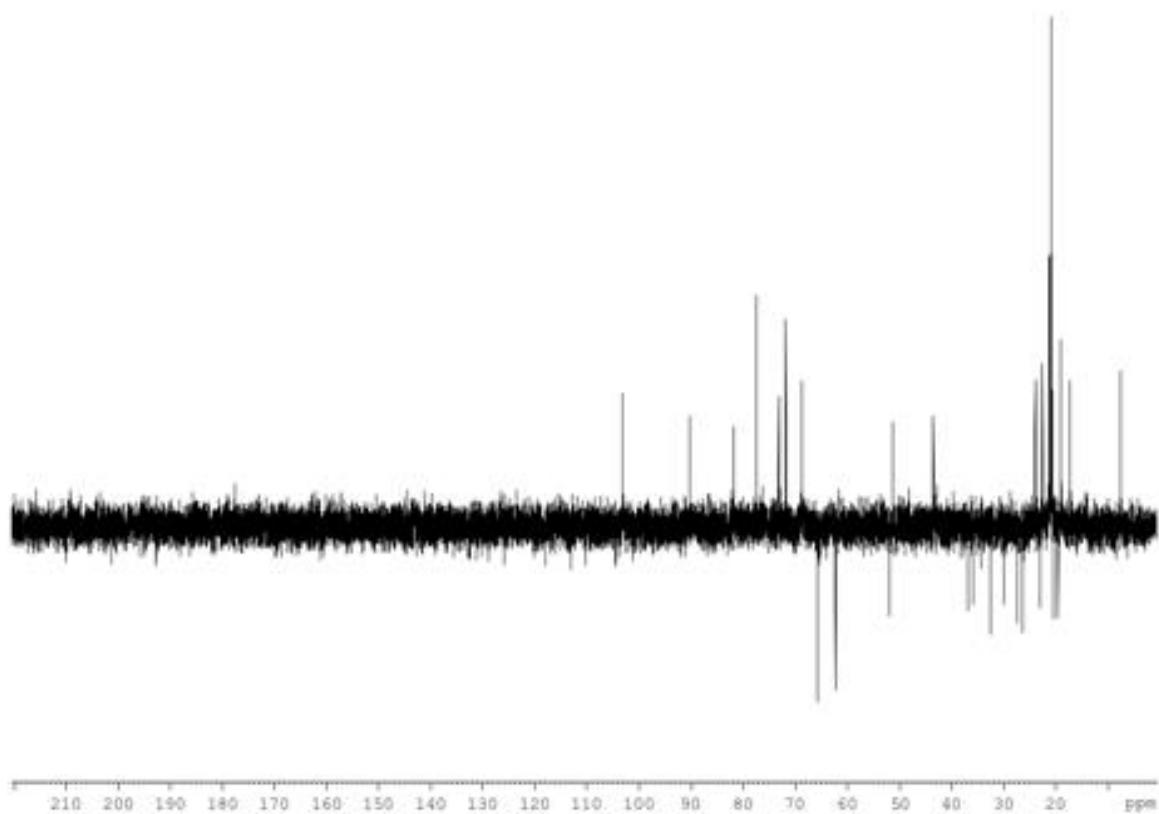

Spectrum S3.12.5: DEPT spectrum for compound 12Ac in CDCl<sub>3</sub>



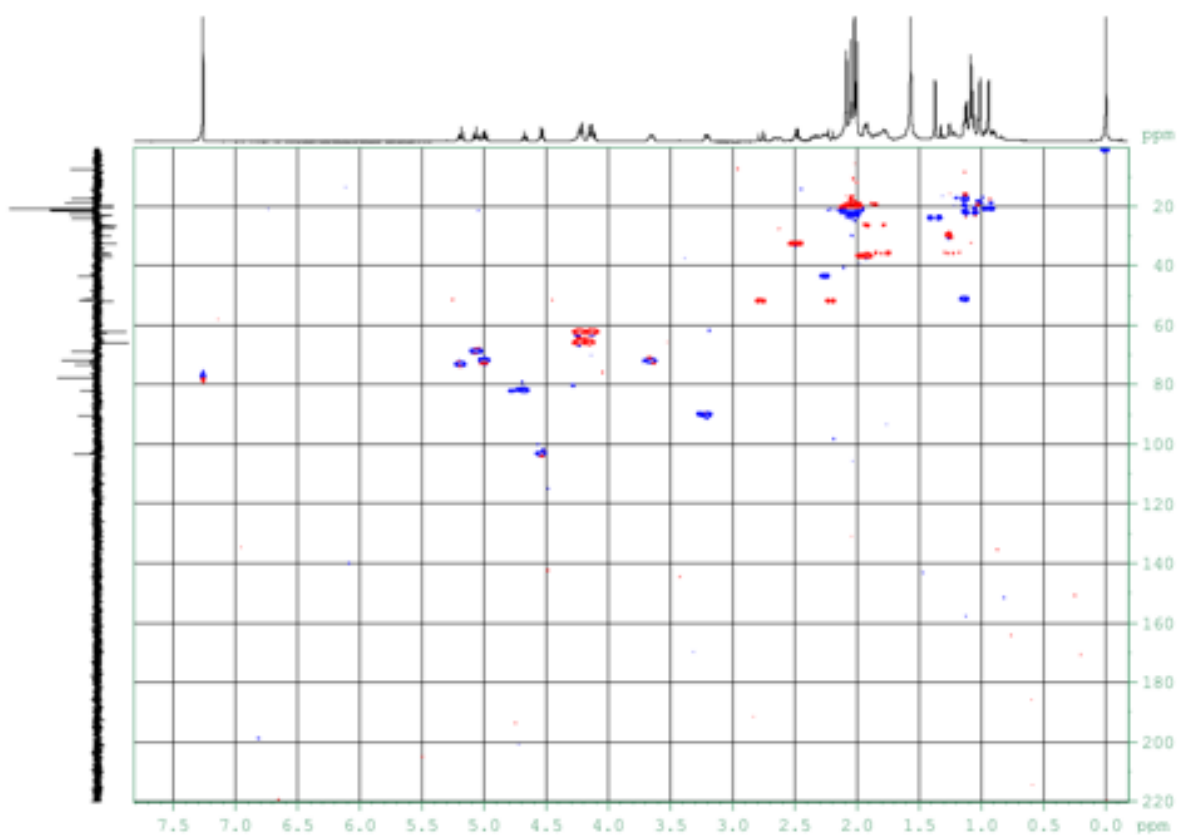

Spectrum S3.12.6: HSQCDEPT spectrum for compound 12Ac in CDCl<sub>3</sub>

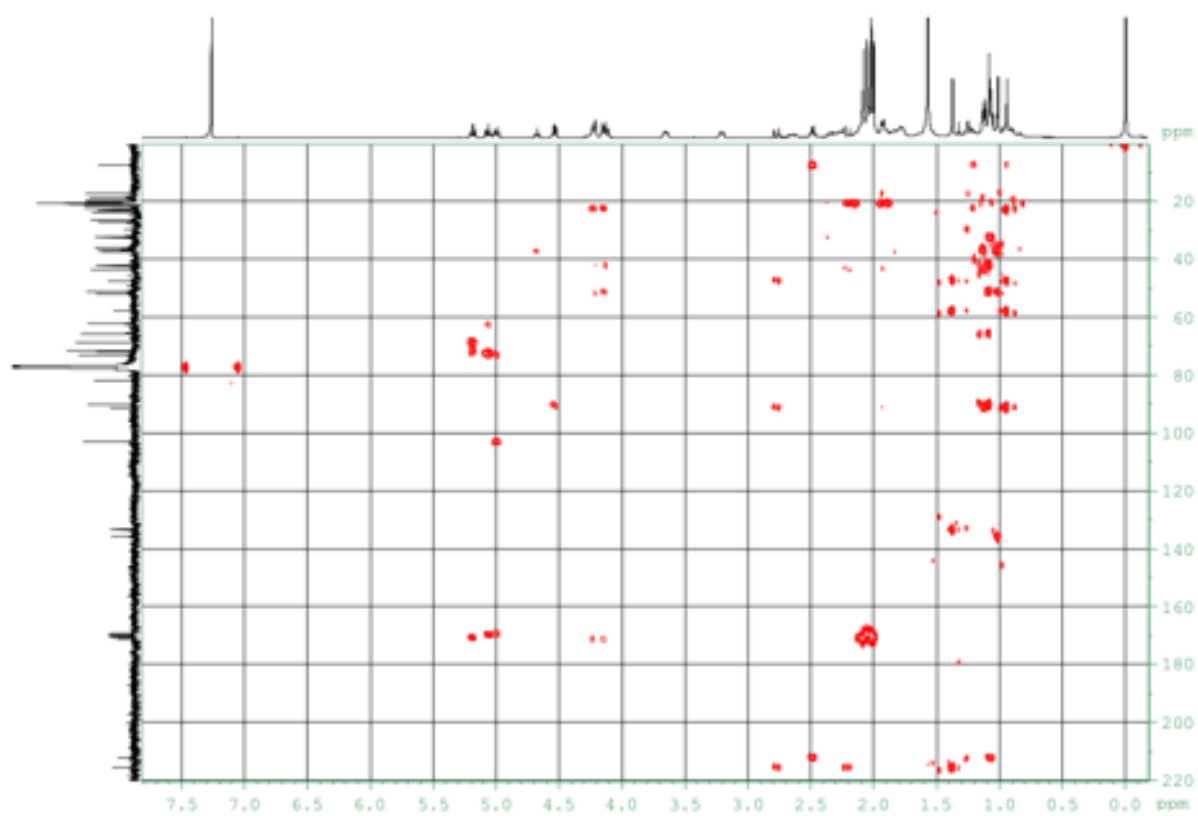

Spectrum S3.12.7: HMBC spectrum for compound 12Ac in CDCl<sub>3</sub>

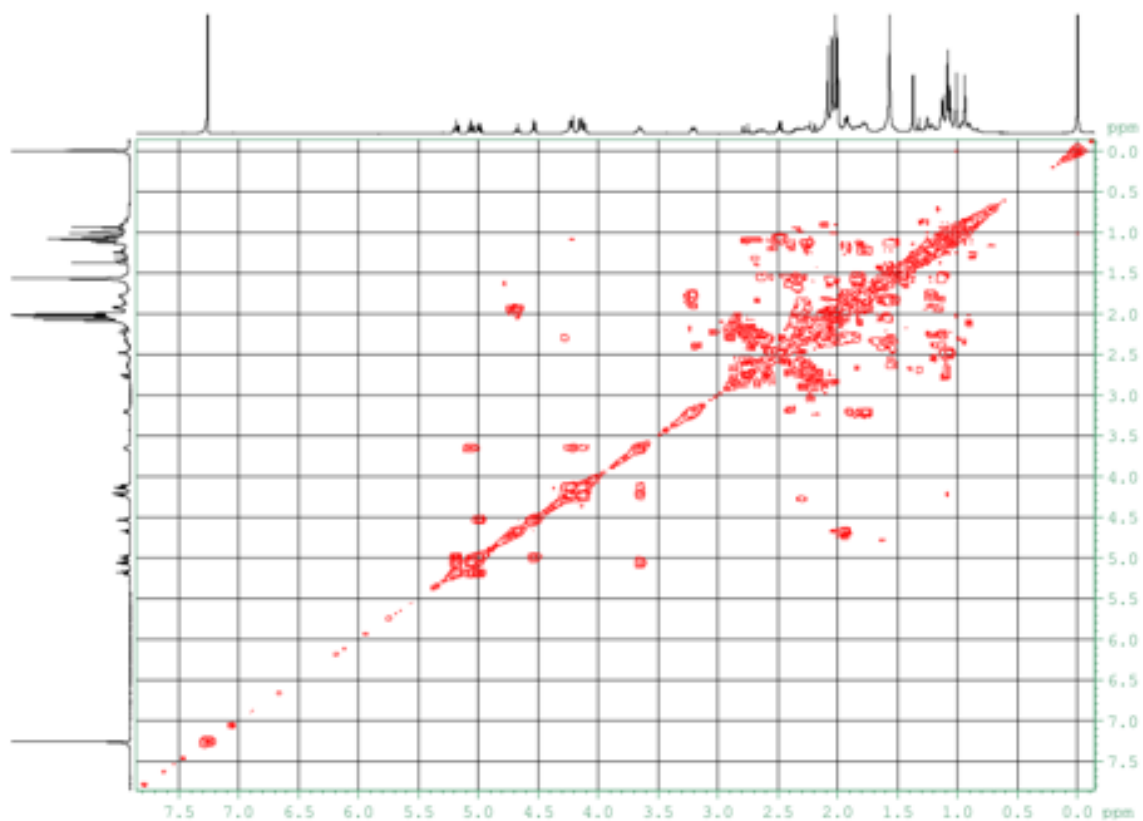

Spectrum S3.12.8: COSY spectrum for compound 12Ac in CDCl<sub>3</sub>

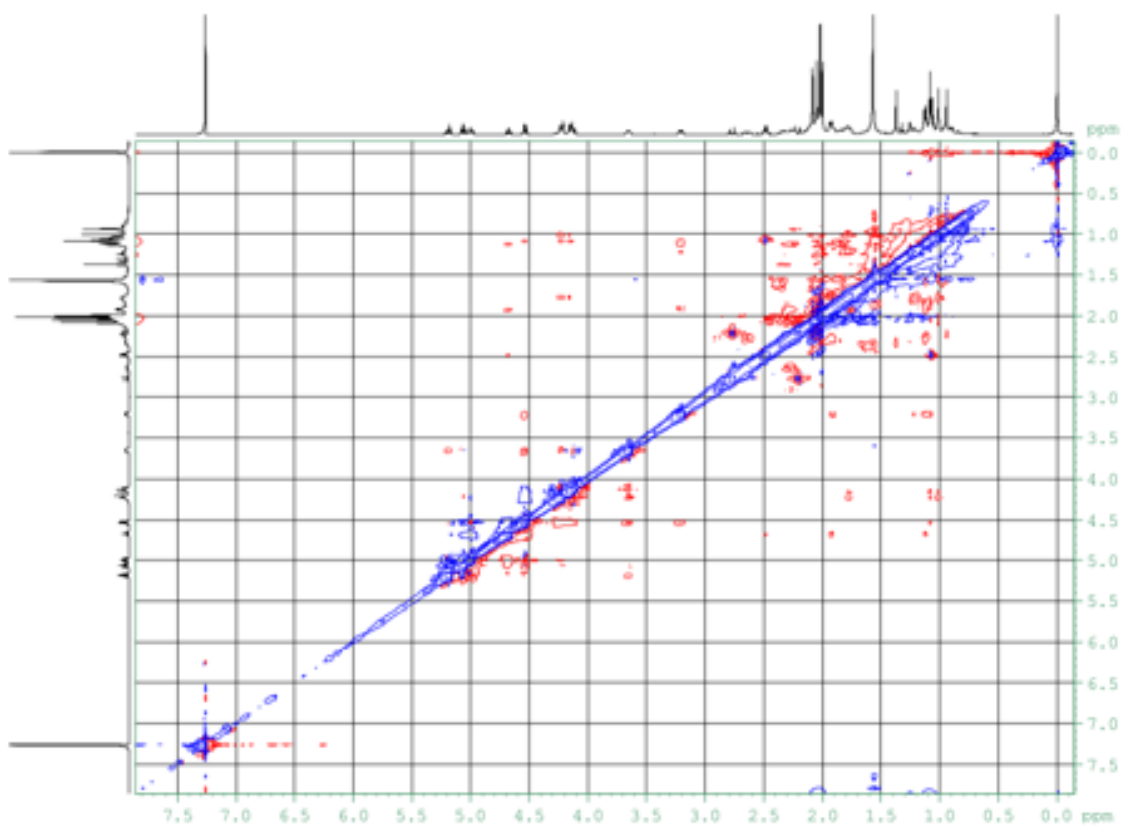

Spectrum S3.12.9: NOESY spectrum for compound 12Ac in CDCl<sub>3</sub>

## Mass Spectrum SmartFormula Report

|                      |                                           |                   |                     |
|----------------------|-------------------------------------------|-------------------|---------------------|
| <b>Analysis Info</b> |                                           | Acquisition Date  | 22/06/2012 14:13:50 |
| Analysis Name        | \\utofData\Jun 12\MSS 10962_55_01_43046.d | Operator          | Mass Spec           |
| Method               | 2.5min_cal_sample_pos_NaI_Mid_mass.m      | Instrument / Ser# | micrOTOF 92         |
| Sample Name          | MSS 10962                                 |                   |                     |
| Comment              |                                           |                   |                     |

|                              |            |                      |          |                  |            |
|------------------------------|------------|----------------------|----------|------------------|------------|
| <b>Acquisition Parameter</b> |            |                      |          |                  |            |
| Source Type                  | ESI        | Ion Polarity         | Positive | Set Nebulizer    | 2.0 Bar    |
| Focus                        | Not active |                      |          | Set Dry Heater   | 180 °C     |
| Scan Begin                   | 100 m/z    | Set Capillary        | 4500 V   | Set Dry Gas      | 10.0 l/min |
| Scan End                     | 1500 m/z   | Set End Plate Offset | -500 V   | Set Divert Valve | Source     |

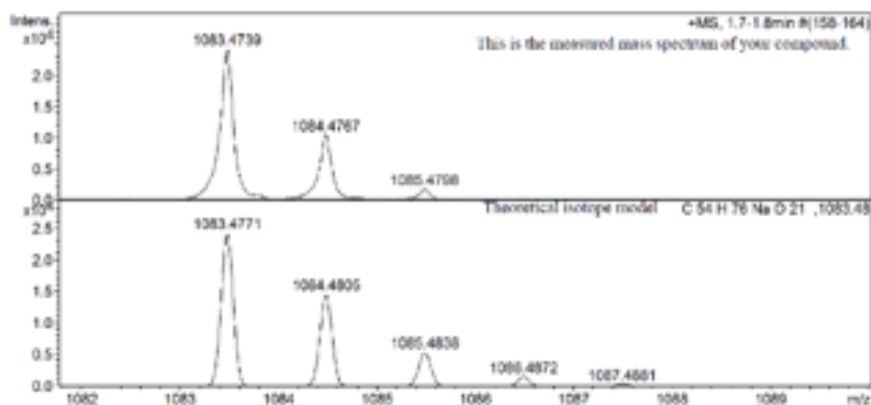

| Meas. m/z | # | Formula                                          | m/z       | err [ppm] | Mean err [ppm] | ndb  | e <sup>-</sup> | Conf   | mSigma |
|-----------|---|--------------------------------------------------|-----------|-----------|----------------|------|----------------|--------|--------|
| 1083.4739 | 1 | C <sub>54</sub> H <sub>76</sub> NaO <sub>2</sub> | 1083.4771 | 3.0       | 3.2            | 16.5 | even           | 100.74 |        |

**Spectrum S3.13.1: Mass spectrum for compound 13Ac**

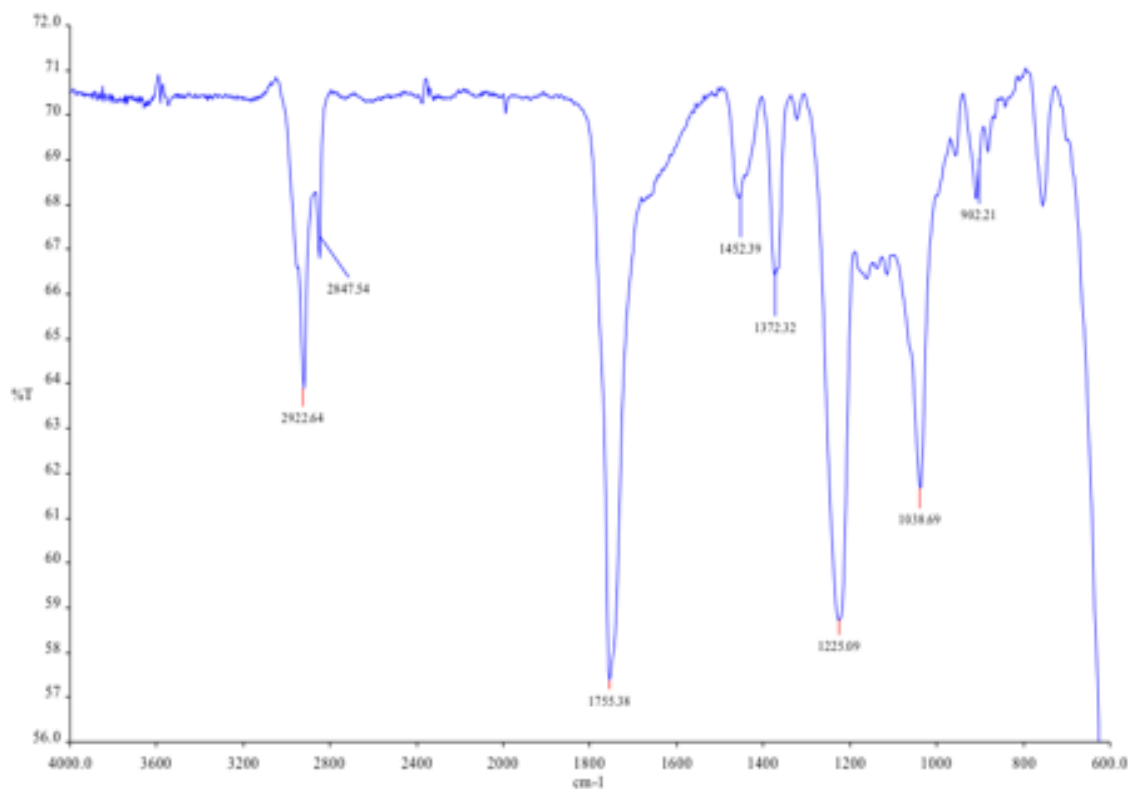

**Spectrum S3.13.2: FTIR spectrum for compound 13Ac**

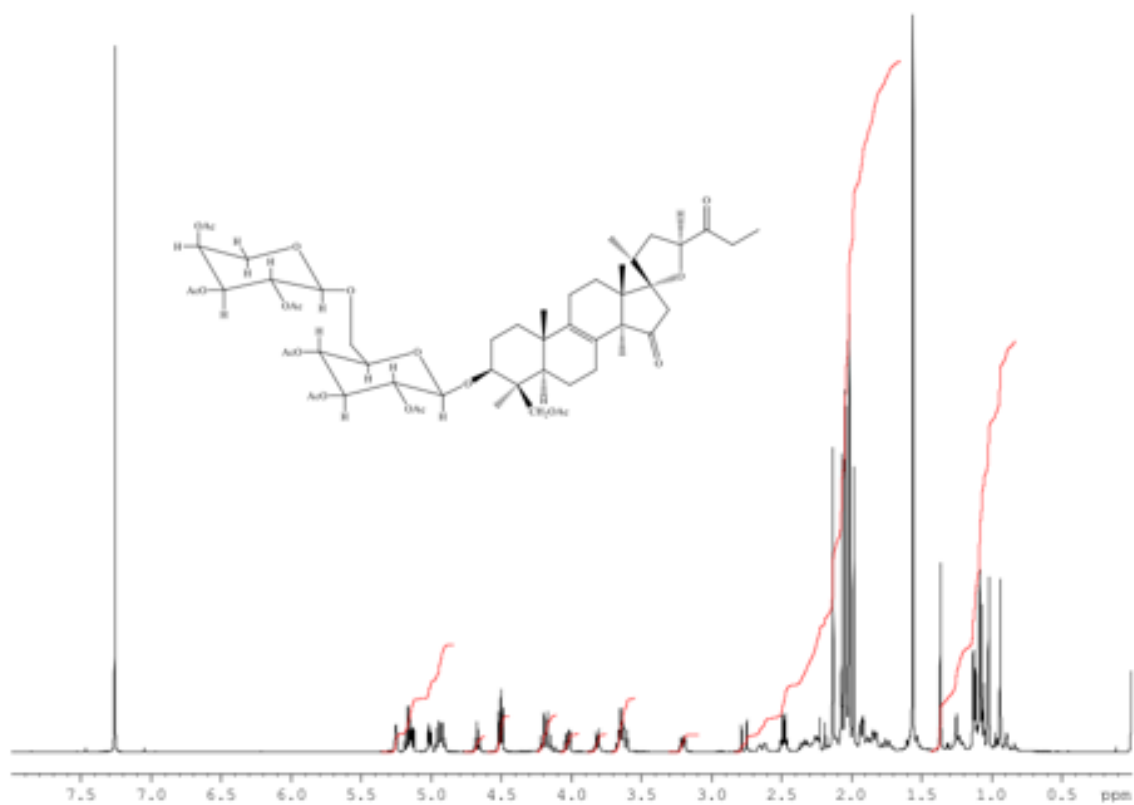

Spectrum S3.13.3: <sup>1</sup>H NMR spectrum for compound 13Ac in CDCl<sub>3</sub>

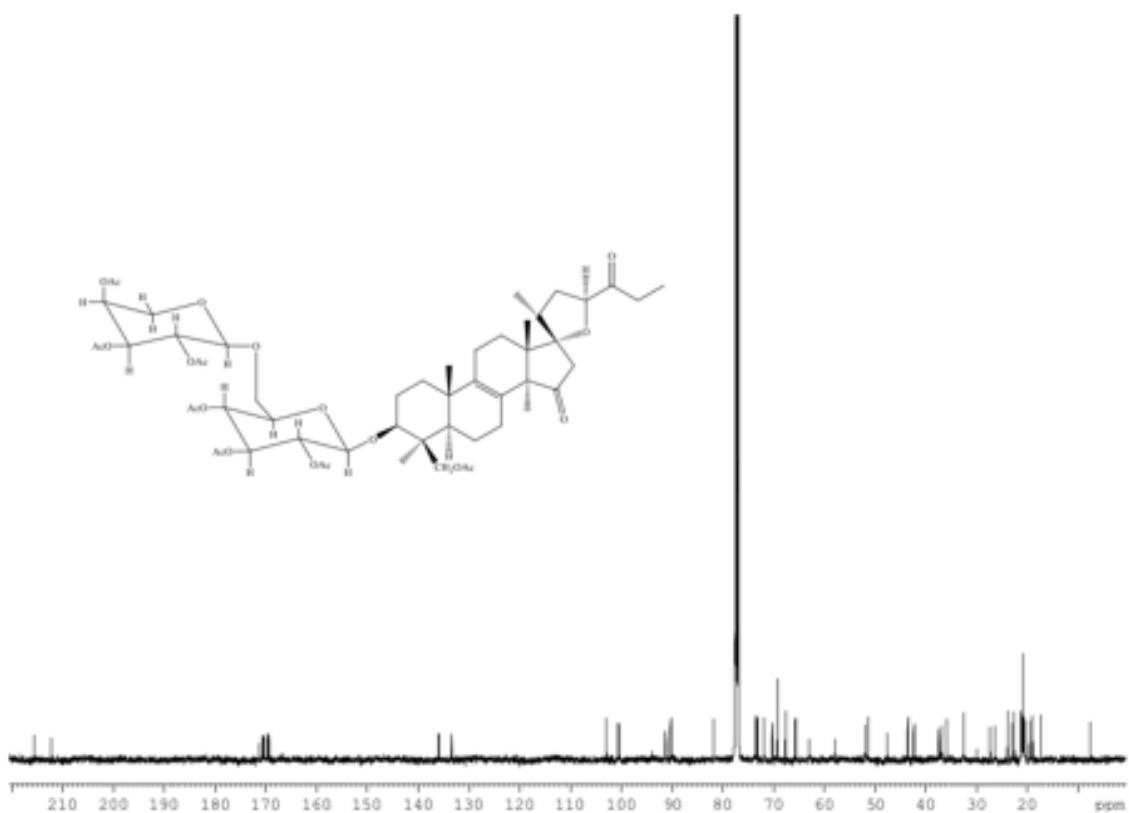

Spectrum S3.13.4: <sup>13</sup>C NMR spectrum for compound 13Ac in CDCl<sub>3</sub>

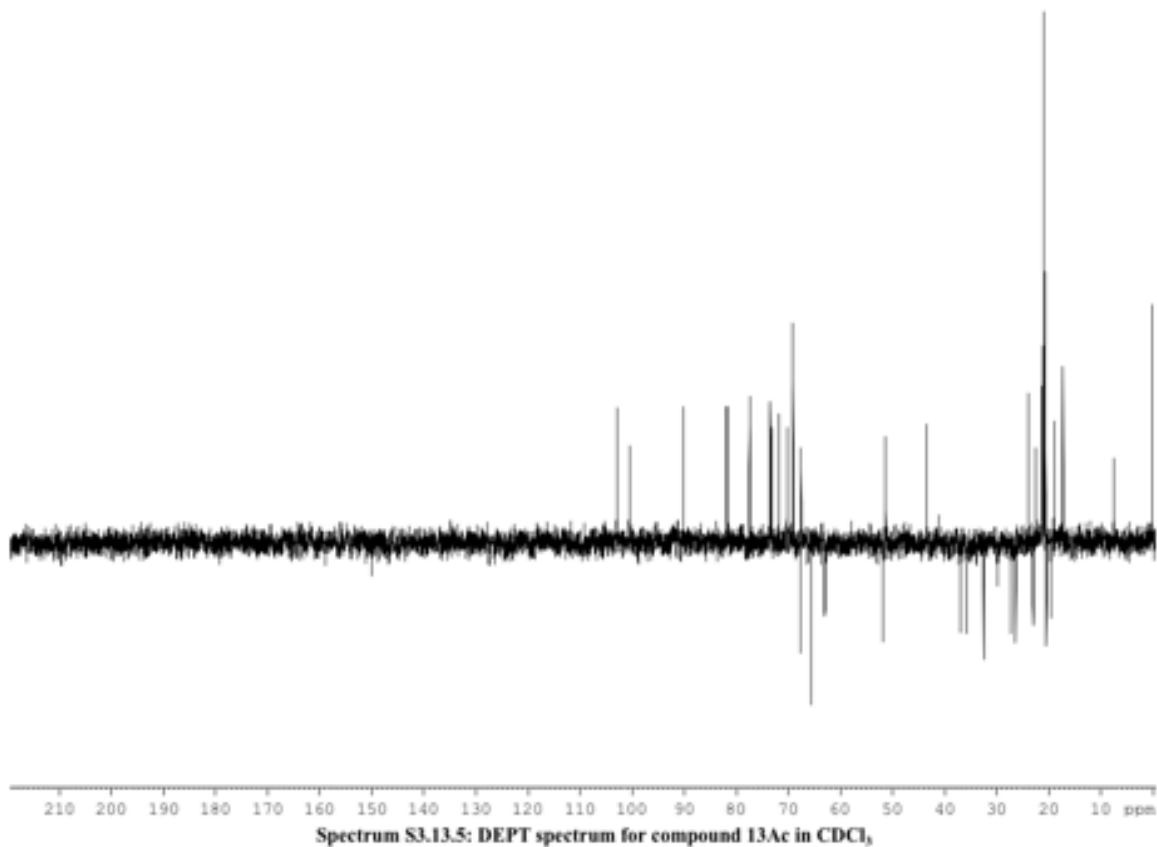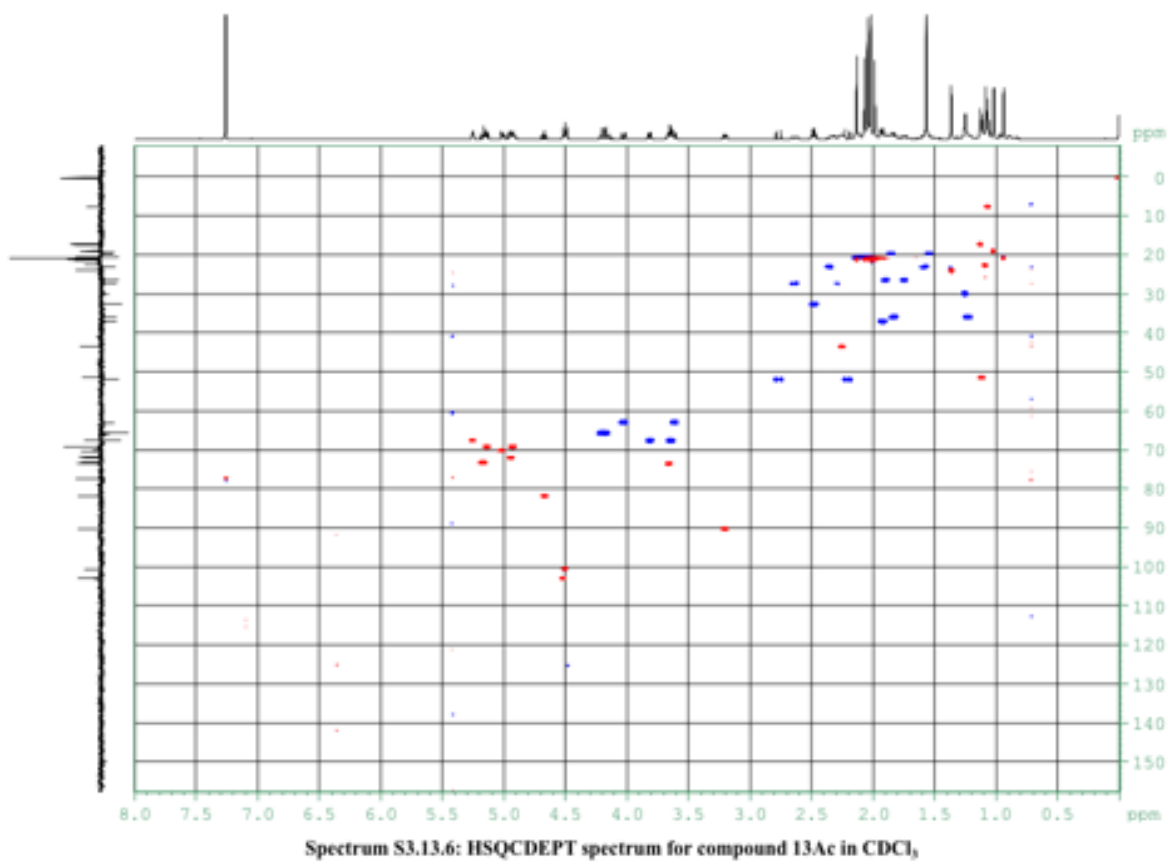

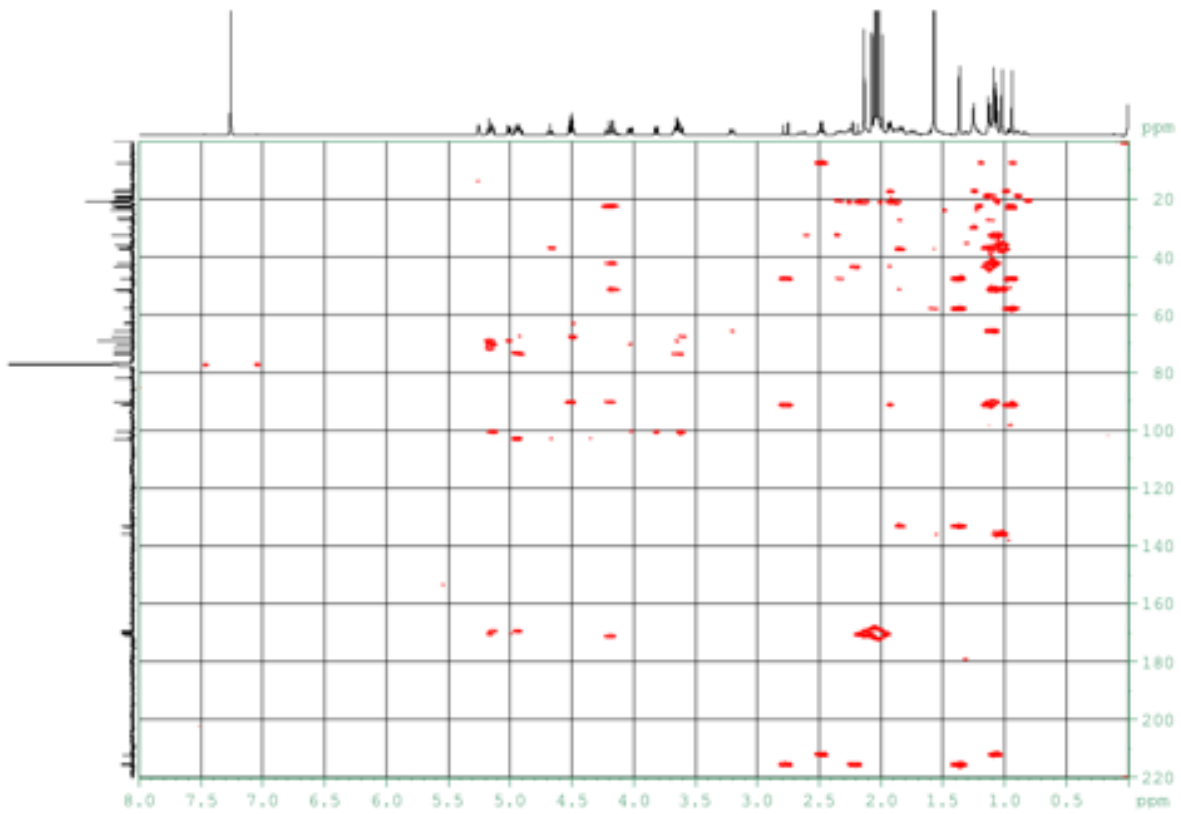

Spectrum S3.13.7: HMBC spectrum for compound 13Ac in CDCl<sub>3</sub>

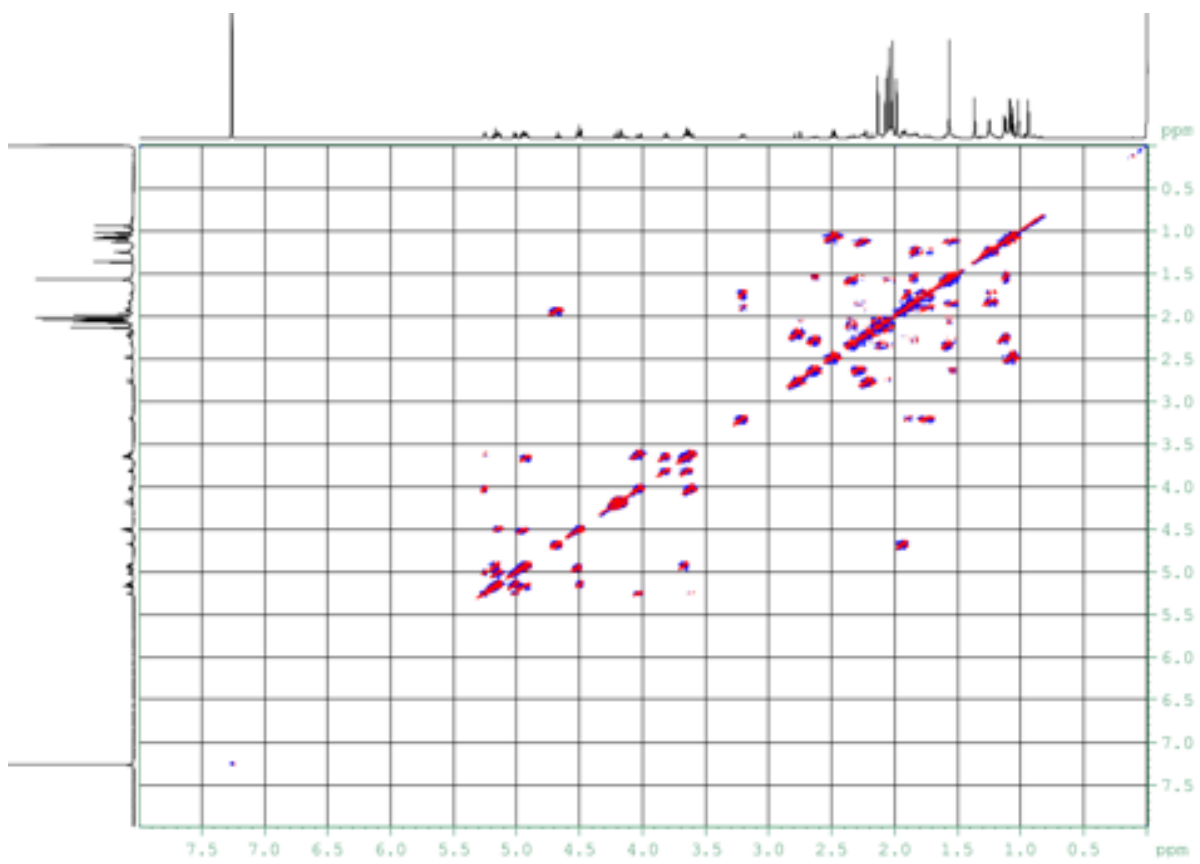

Spectrum S3.13.8: COSY spectrum for compound 13Ac in CDCl<sub>3</sub>

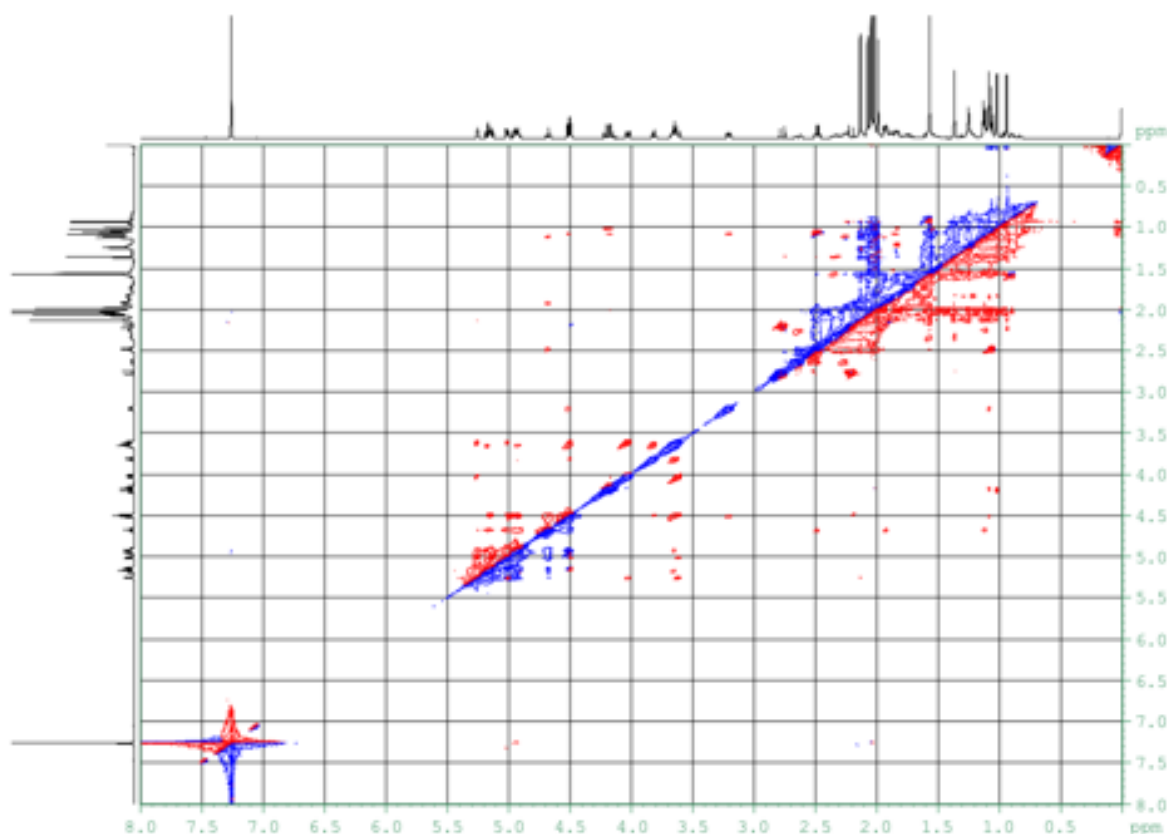

Spectrum S3.13.9: NOESY spectrum for compound 13Ac in CDCl<sub>3</sub>,

### Mass Spectrum SmartFormula Report

#### Analysis Info

Analysis Name: \\Ulf\ofData\Jun 12\MSS 10979b\_B2\_01\_44060.d  
 Method: 2.5min\_cal\_sample\_pos\_Naf\_Mid\_mass.m  
 Sample Name: MSS 10979b  
 Comment:

Acquisition Date: 25/06/2012 17:01:47

Operator: Mass Spec  
 Instrument / Ser#: microTOF 92

#### Acquisition Parameter

|             |            |                      |          |                  |            |
|-------------|------------|----------------------|----------|------------------|------------|
| Source Type | ESI        | Ion Polarity         | Positive | Set Nebulizer    | 2.0 Bar    |
| Focus       | Not active |                      |          | Set Dry Heater   | 180 °C     |
| Scan Begin  | 100 m/z    | Set Capillary        | 4500 V   | Set Dry Gas      | 10.0 l/min |
| Scan End    | 1500 m/z   | Set End Plate Offset | -800 V   | Set Divert Valve | Source     |

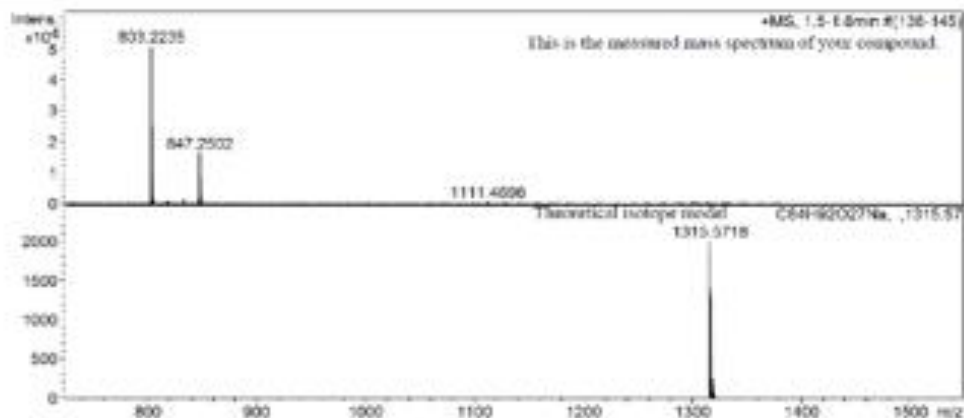

| Meas. m/z | # | Formula | m/z | err [ppm] | Mean err [ppm] | rdc | e <sup>-</sup> | Conf | rdsigma |
|-----------|---|---------|-----|-----------|----------------|-----|----------------|------|---------|
|-----------|---|---------|-----|-----------|----------------|-----|----------------|------|---------|

Spectrum S3.14.1: Mass spectrum for compound 14Ac

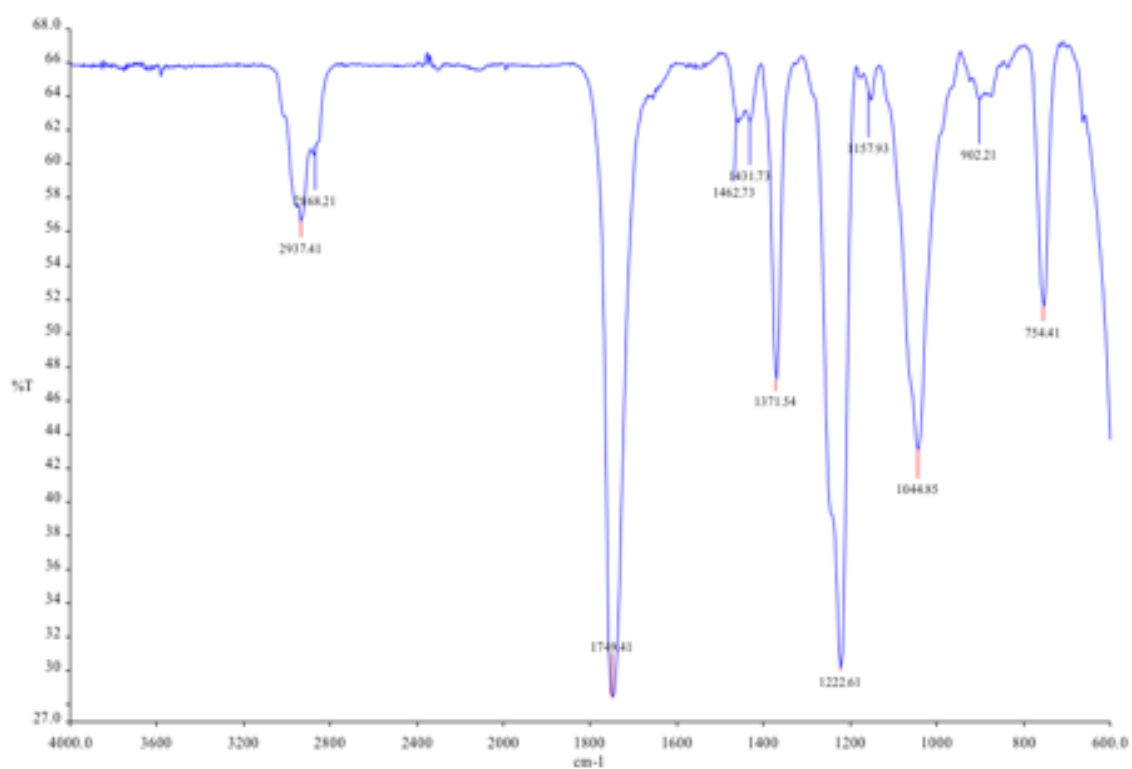

Spectrum S3.14.2: FTIR spectrum for compound 14Ac

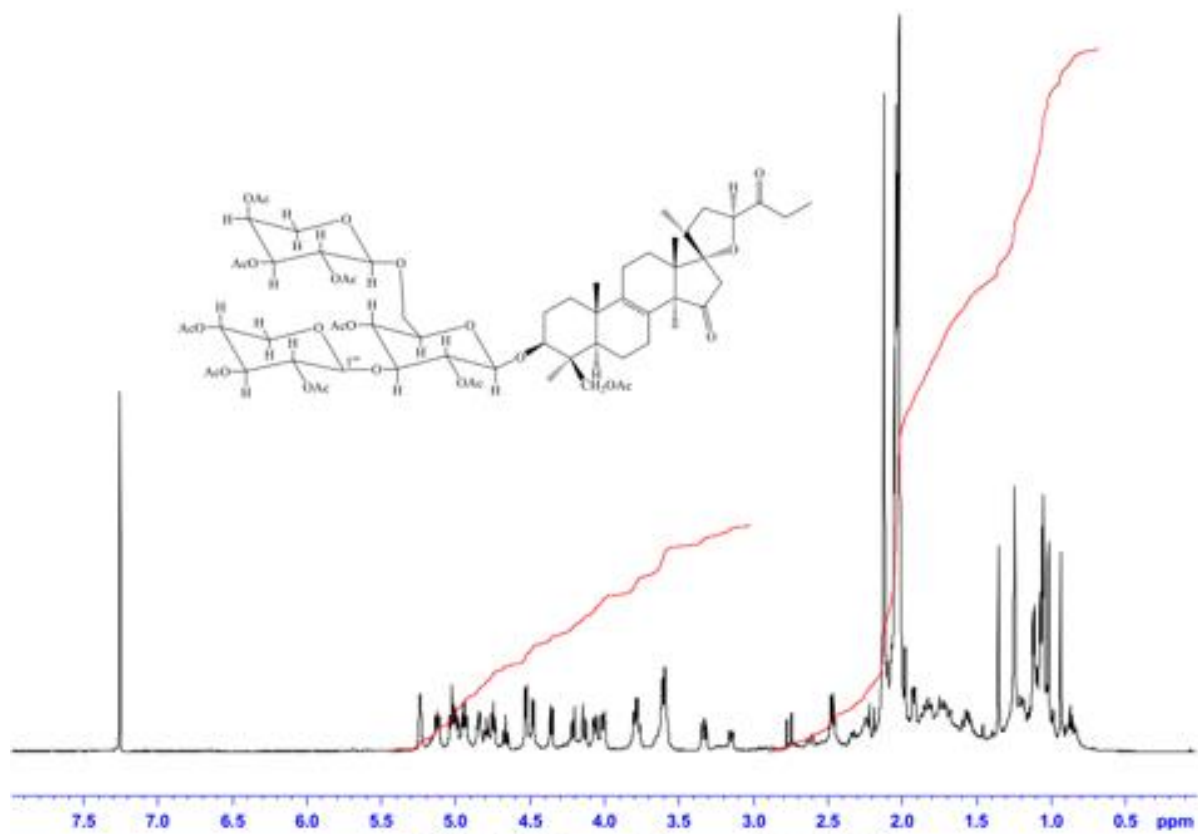

Spectrum S3.14.3: <sup>1</sup>H NMR spectrum for compound 14Ac in CDCl<sub>3</sub>



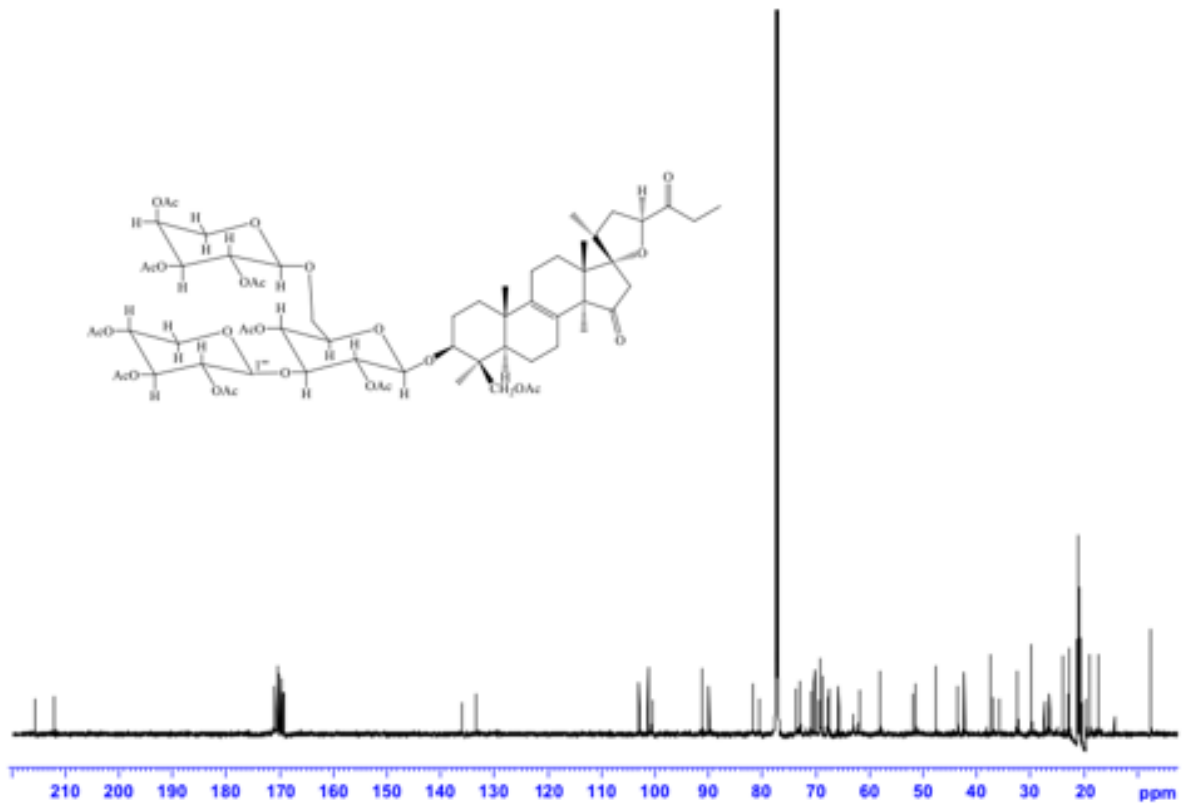

Spectrum S3.14.4:  $^{13}\text{C}$  NMR spectrum for compound 14Ac in  $\text{CDCl}_3$

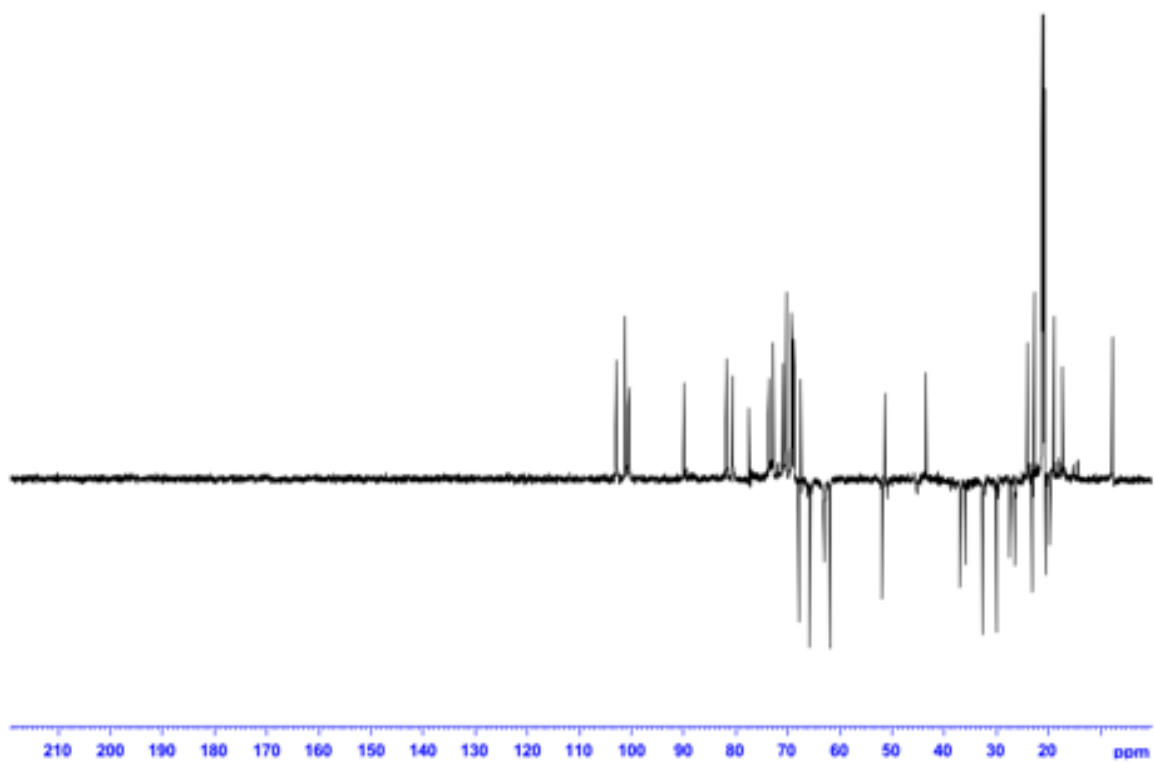

Spectrum S3.14.5: DEPT spectrum for compound 14Ac in  $\text{CDCl}_3$

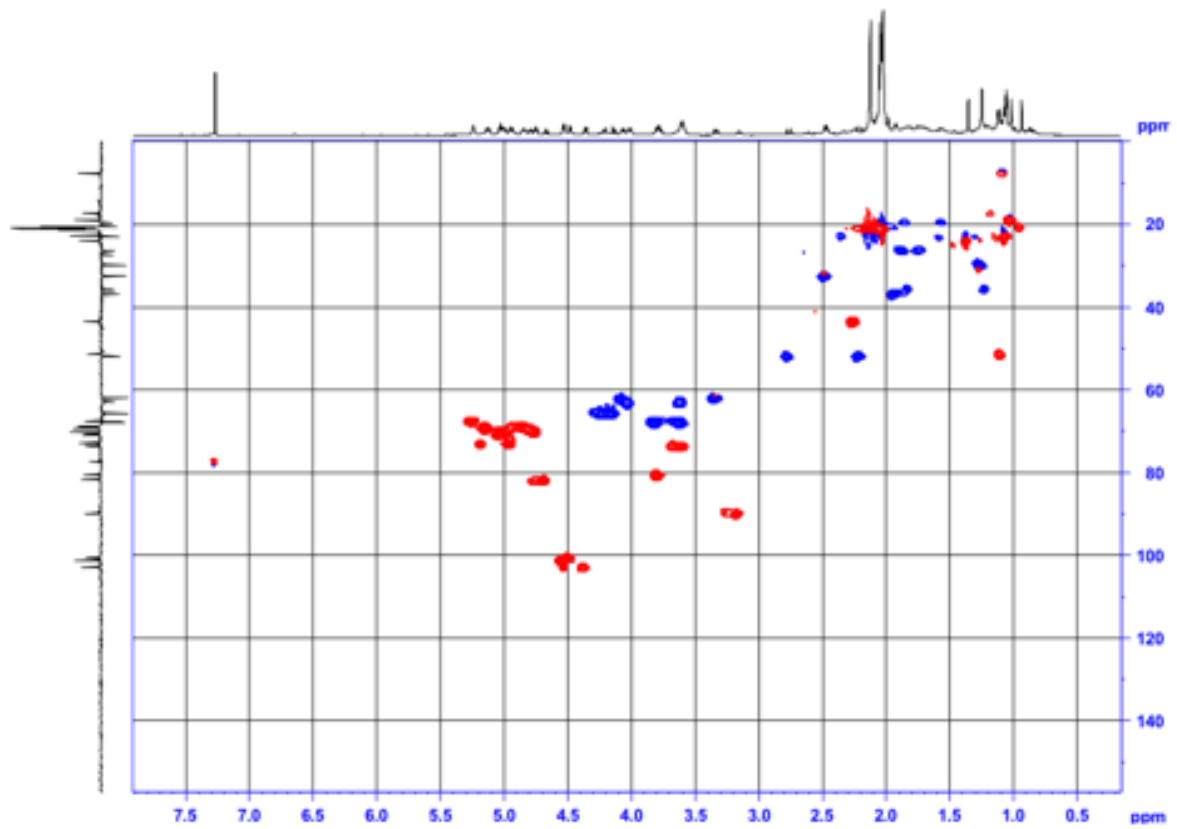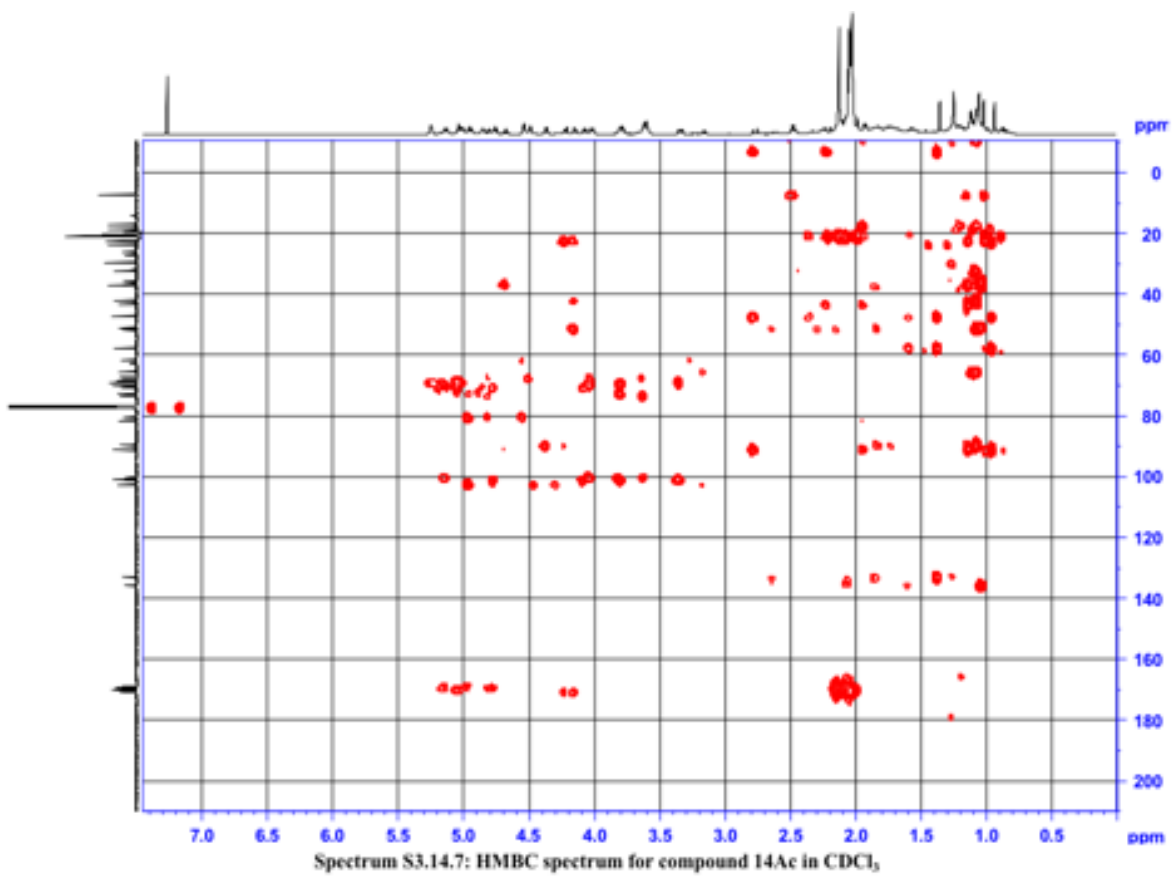

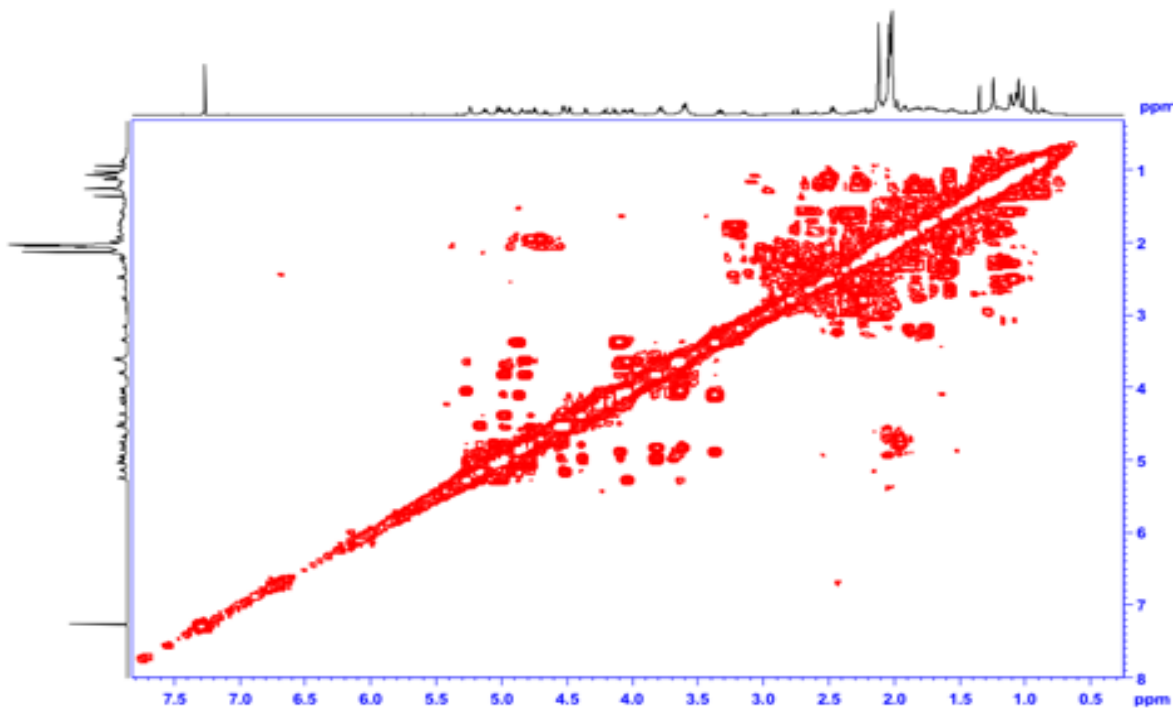

Spectrum S3.14.8: COSY spectrum for compound 14Ac in CDCl<sub>3</sub>

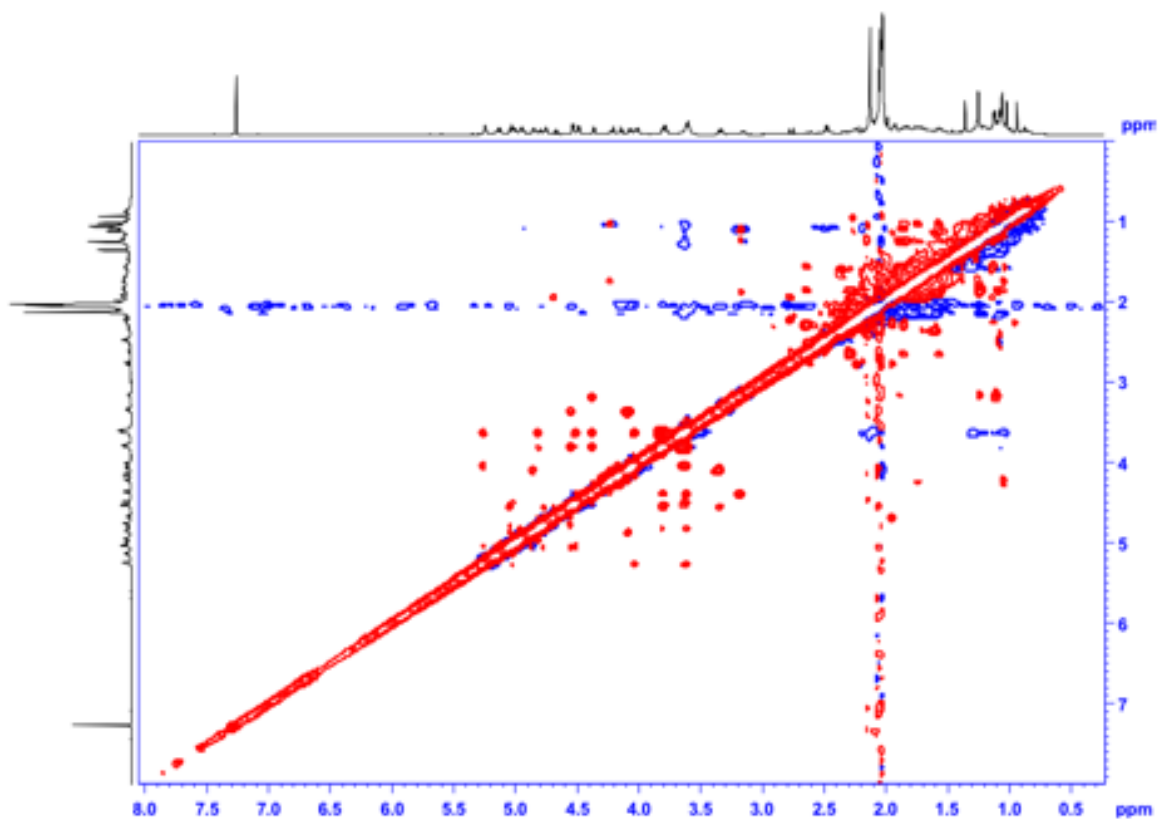

Spectrum S3.14.9: NOESY spectrum for compound 14Ac in CDCl<sub>3</sub>

## S.5 NCI 59 CELL SCREENING DATA FOR COMPOUNDS

The following compounds were submitted to the NCI-59 Panel:

5,7-dihydroxy-8-methoxy-3-(4'-methoxybenzyl)-4-chromanone (**EB1**), eucosterol (**EB4**), (2*S*)-17 $\alpha$ ,23-epoxy-3 $\beta$ ,28,29-trihydrox-27-norlanost-8-en-24-one (**EB5**), **2Ac**, **3**, **4** and **5**. Structures are provided in S.1

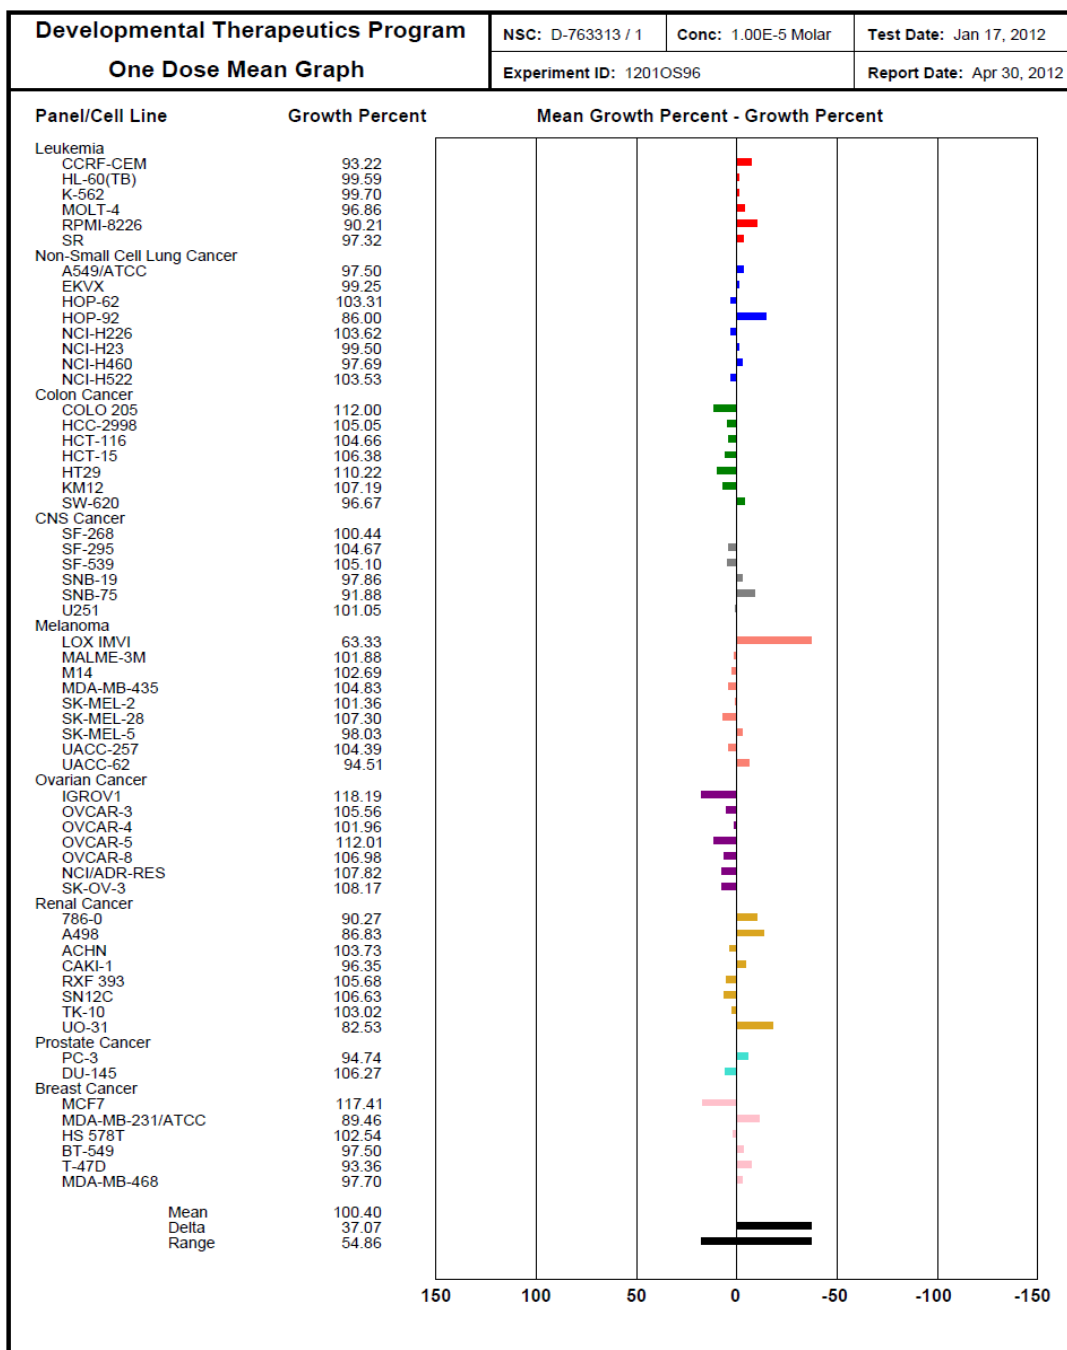

Figure S.4.1: Single dose screen report for compound EB1

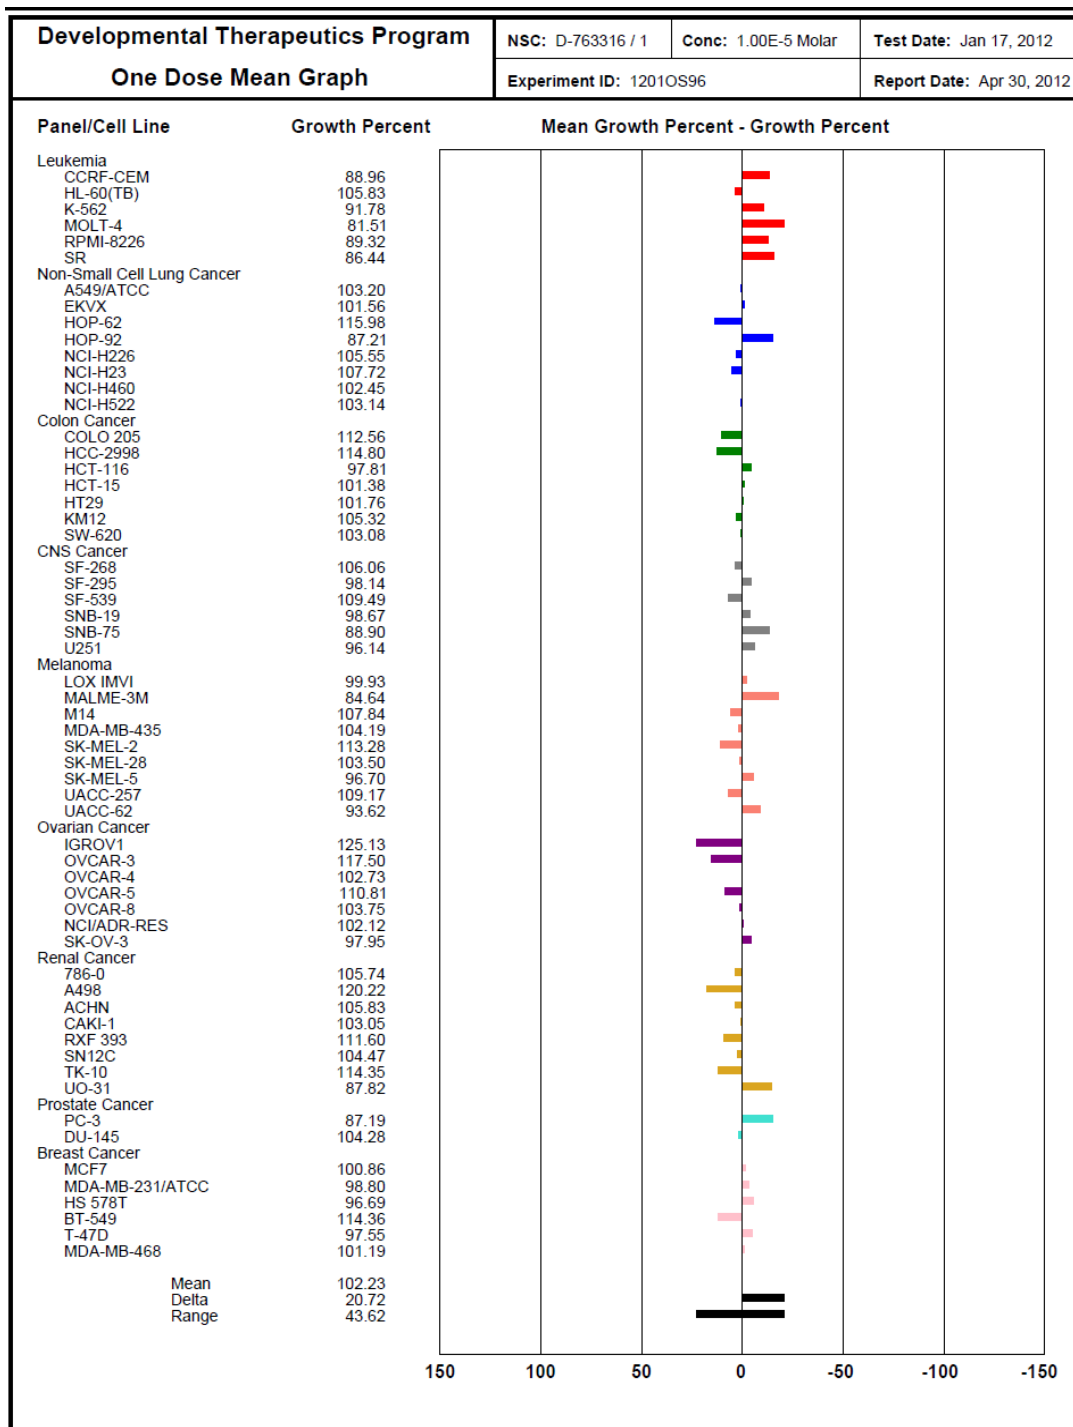

Figure S.4.2: Single dose screen report for compound EB4

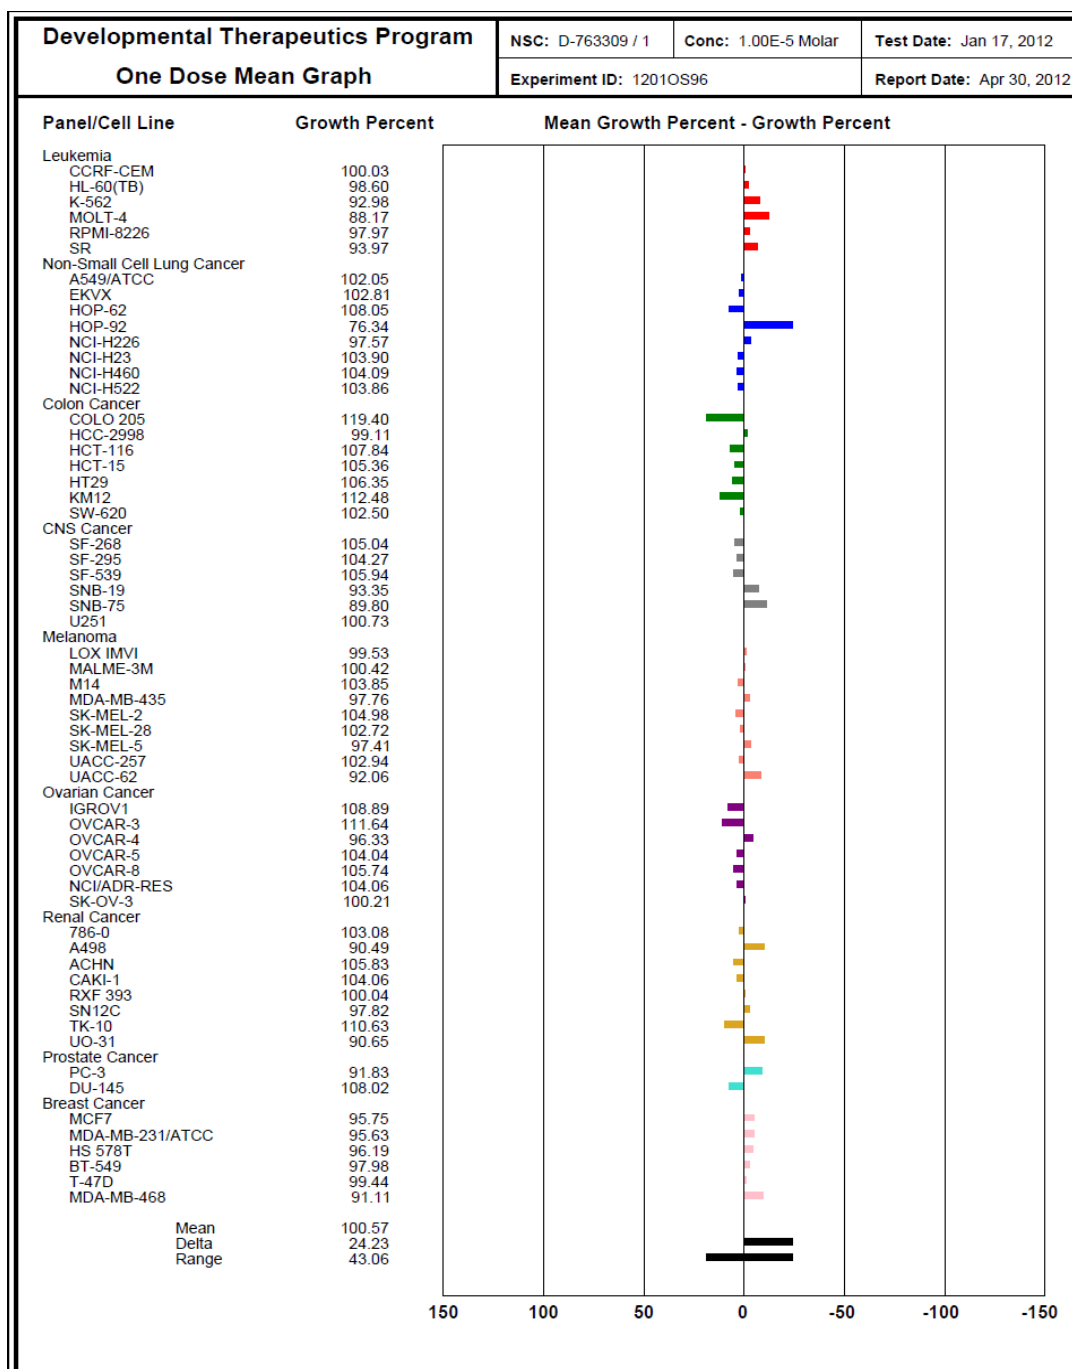

Figure S.4.3: Single dose screen report for compound EB5

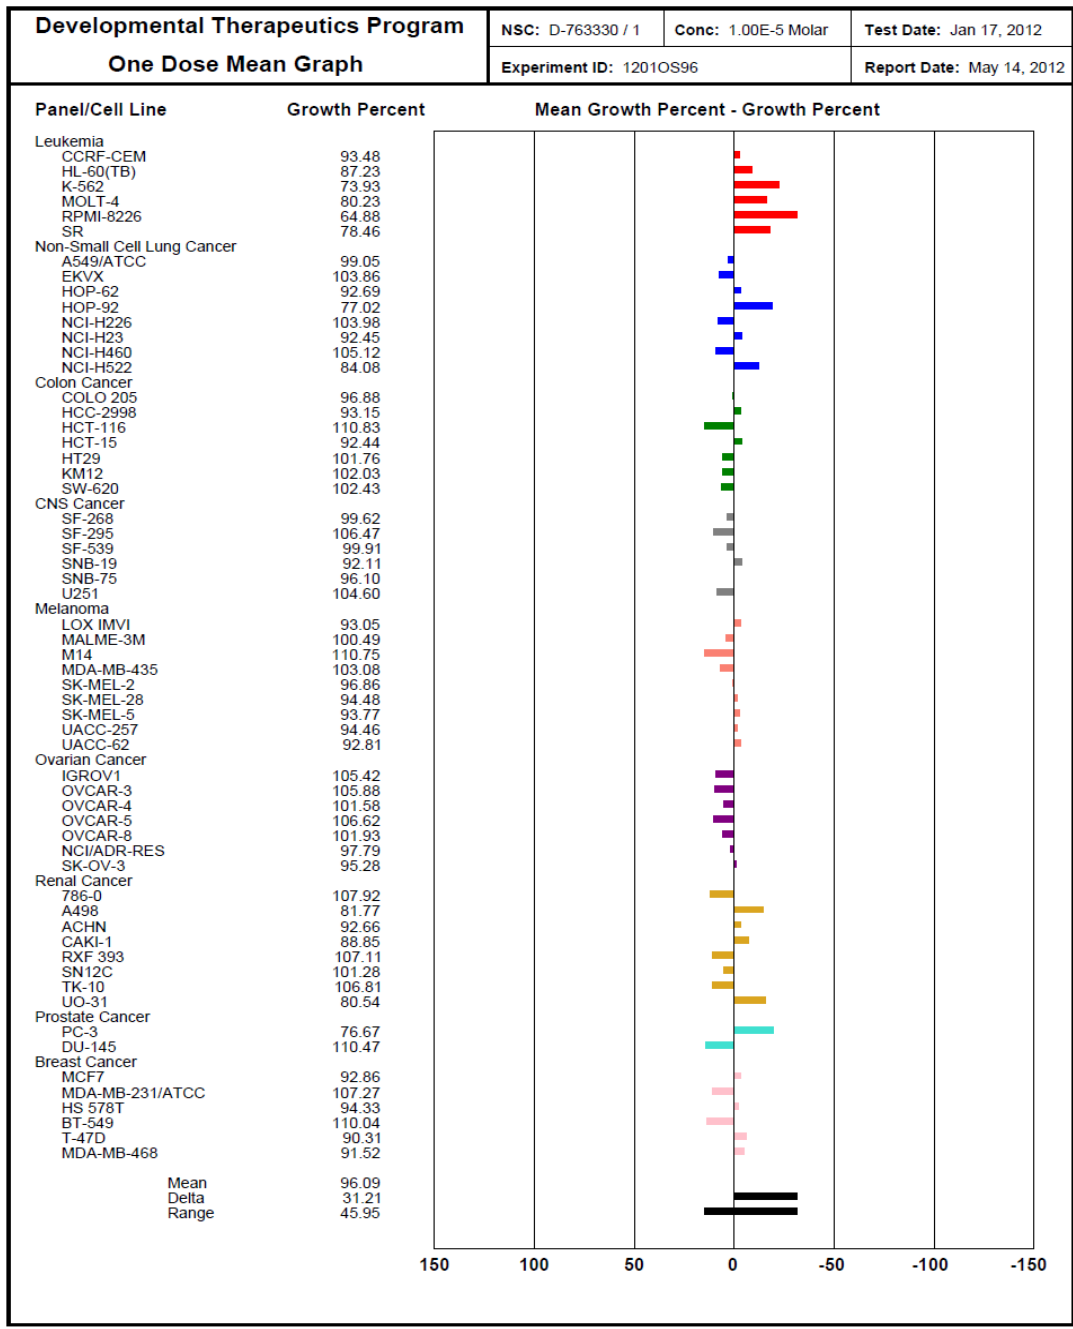

Figure S.4.4: Single dose screen report for compound 2Ac

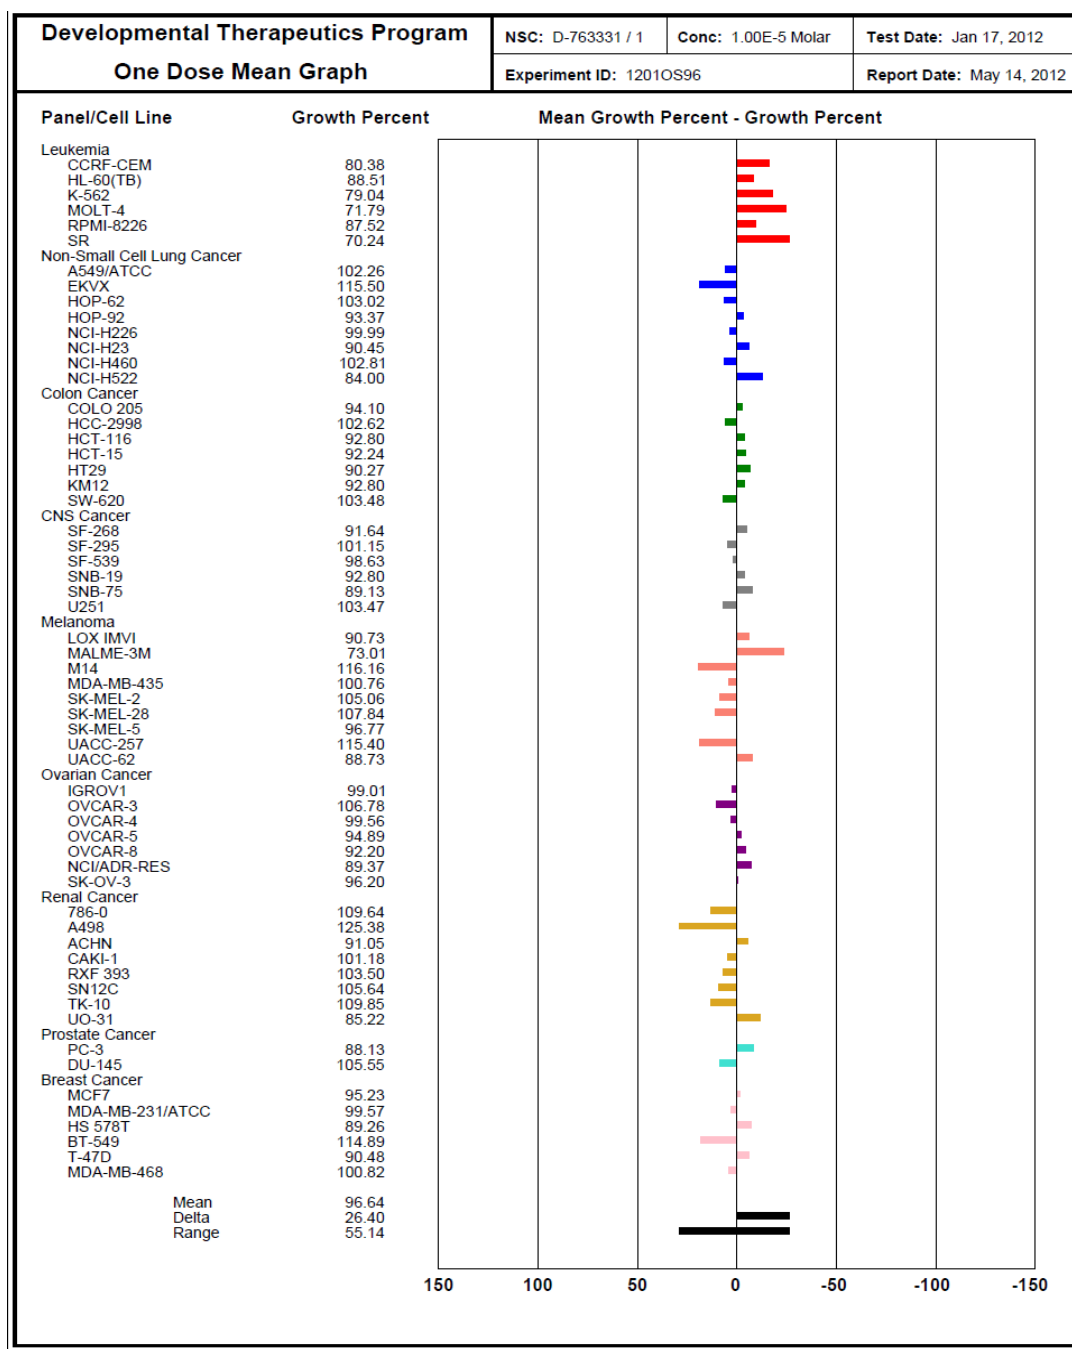

Figure S.4.5: Single dose screen report for compound 3



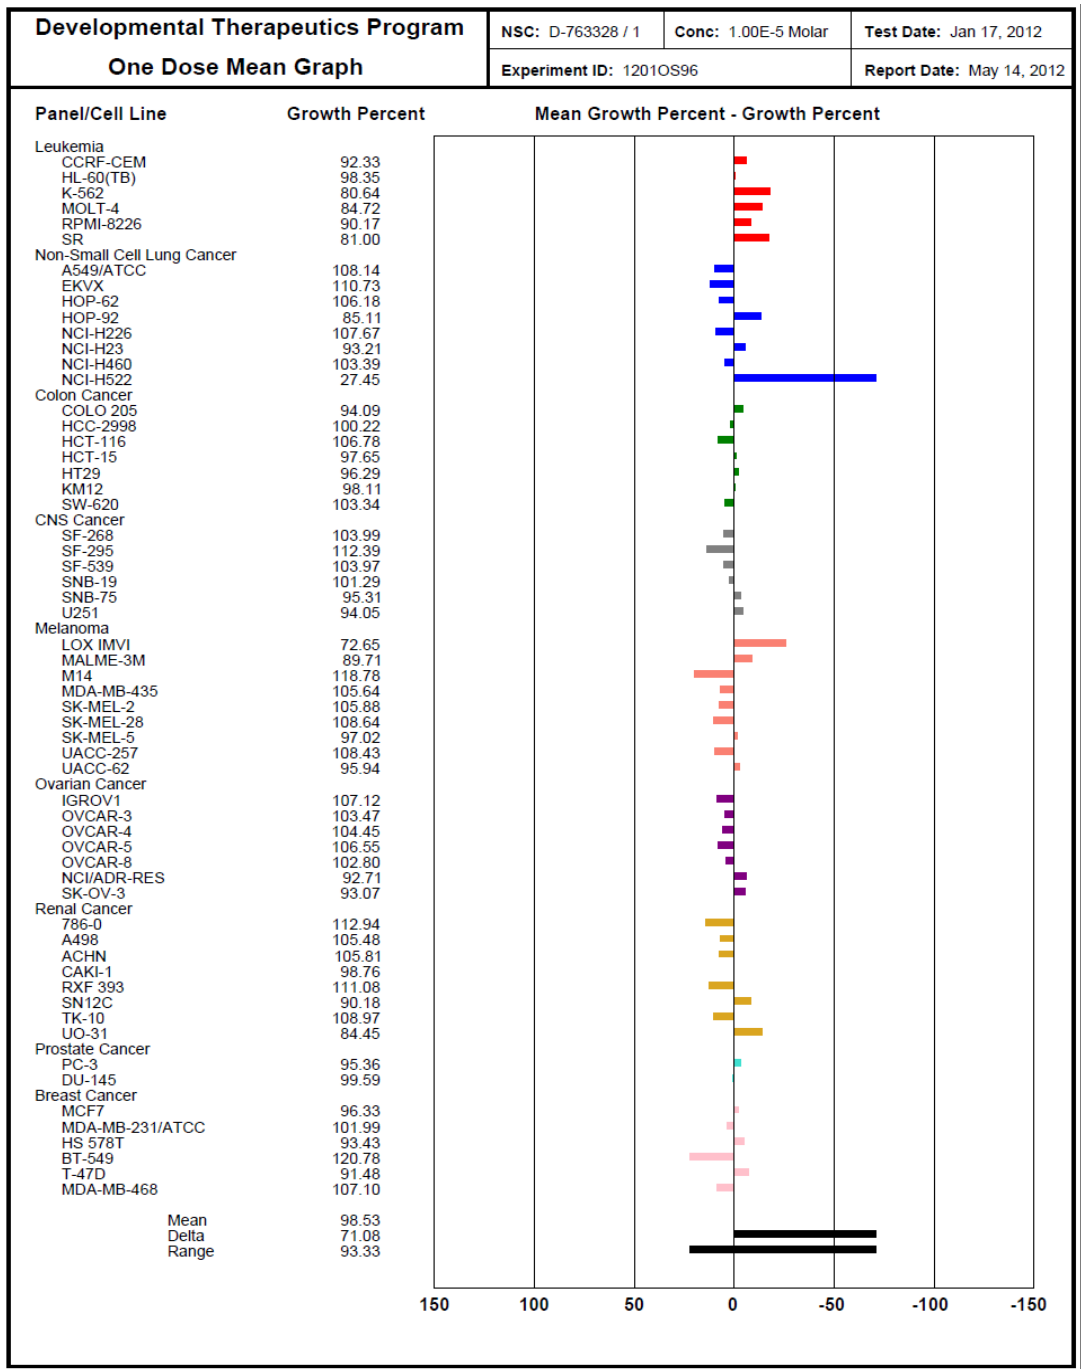

Figure S.4.6: Single dose screen report for compound 5
